# Supplementary material
Source: Research Square preprint supplement (doi:10.21203/rs.3.rs-9444283/v1)
Supplement: Supplementary file 1 [file 75f836a2b33d37efd753f10f.xlsx]

## Sheet: Table S2
Table S2 The list of strongly correlated genes
	cor	P
AAED1	0.12908874133487	0.0000471183849010787
ABCF2	0.119386540786744	0.000169017011854472
ABHD14A	0.111386446573743	0.000452102117388651
ABL2	0.112877098647026	0.000378150268207752
AC022400.2	-0.122863	0.000108085437540263
AC092667.2	0.100065662641571	0.00163697822875064
AC104024.1	0.101159649615971	0.00145334037241155
AC104699.1	0.127881249970304	0.0000555173267642014
AC137932.1	0.109789537568245	0.000546138224401891
AC159540.1	0.127412000765272	0.000059148475454474
ACACB	0.100084871691825	0.00163357775168762
ACAT1	0.148941268961211	0.00000257733743979735
ACBD6	0.103906147829906	0.00107263094475286
ACIN1	0.123425737356303	0.000100432308207919
ACP5	0.103603702078091	0.00110950786549906
ACSF3	0.11785841979866	0.000204947803509211
ACTB	0.126318642421032	0.0000684994417579786
ACTR2	0.165435027825929	0.000000169948334199426
ACTR3	0.182010154939147	0.00000000831330092489052
ACYP2	0.128955887323263	0.000047979871837586
ADAM10	0.126513453073761	0.0000667370524987203
ADAM28	0.14560593154311	0.00000431771703828656
ADAR	0.121955898591079	0.000121601534959421
ADCK2	0.105028591589098	0.00094544656185042
ADIPOR1	0.113326946687726	0.000358155051075649
ADNP	0.137477452324787	0.0000144841523717053
ADNP2	0.107910273870642	0.000680002015959942
ADPRH	0.110676284769955	0.000491885786483062
ADSS	0.111631001523163	0.000439110878559066
AFF4	0.160887766492178	0.000000369858181403263
AGO1	0.102370325093823	0.00127233876611626
AGPAT3	0.10560807417531	0.000885387593111467
AHI1	0.146689700211463	0.00000365577899604218
AHNAK	0.119975175275672	0.000156826512852675
AHSA2	0.102076536662771	0.00131424389700305
AIG1	0.113577458395327	0.000347452511054156
AIM2	0.116642919733961	0.000238519076048923
AIMP1	0.110072568342723	0.00052824508667759
AIP	0.145135306515645	0.00000463957388115777
AKAP11	0.122015882888577	0.000120661073541306
AKAP13	0.209593796880104	0.000000000028571877633973
AKAP9	0.220623419508775	0.000000000002340226243976
AKNA	0.150935784953319	0.00000188287646768458
AKR1B1	0.119159038215028	0.000173962716742078
AKT2	0.16151930546055	0.000000332421006207002
AL592183.1	0.147344174314394	0.0000033043322281893
AL592284.1	0.107912689767255	0.000679811886634835
ALDH2	0.106751291104584	0.000777124674864098
ALKBH2	0.121351716431014	0.000131466817578551
ALPL	0.149733277957655	0.00000227634796452397
AMD1	0.156919914764669	0.000000716359835354559
ANAPC16	0.177596296691687	0.0000000191006649499341
ANAPC4	0.115494373807116	0.000274915598663386
ANKLE2	0.103654365907979	0.00110324996245938
ANKRD11	0.199300092015922	0.000000000261443600708939
ANKRD12	0.21129623198903	0.0000000000195905059730622
ANKRD13A	0.105775049543236	0.000868748978008229
ANKRD28	0.100537084827866	0.00155537621303241
ANKRD36C	0.105799181634088	0.000866368368724315
ANKRD44	0.141433361306342	0.0000081038758254463
ANKRD49	0.151834093731288	0.00000163243428356495
ANKRD54	0.104673657774176	0.000984071005582511
ANKS1A	0.105943828423637	0.000852225227430932
ANP32B	0.129919559027965	0.0000420542802332283
ANTXR2	0.12991596117444	0.0000420750544290838
ANXA7	0.123072801139122	0.000105172750554083
AP001046.5	0.11497736415094	0.000292941229203681
AP1G1	0.111299754078431	0.000456792741295912
AP3S1	0.132619246949965	0.0000289265138063917
APOBEC3F	0.100975081062489	0.00148292883454235
APOL1	0.102430272543846	0.00126394079529458
APRT	0.151614582933458	0.00000169050201606878
ARCN1	0.107962828159342	0.000675877152186703
ARF5	0.182143342062581	0.00000000810461650359082
ARFGAP2	0.114034224904635	0.000328703105005954
ARFGEF1	0.113422775787335	0.000354025126130008
ARGLU1	0.198104981277948	0.00000000033553586730311
ARHGAP1	0.184010579674547	0.00000000566339950465526
ARHGAP15	0.107849706941836	0.000684784749046851
ARHGAP24	0.192236017962798	0.00000000111713655701048
ARHGAP25	0.117637049956234	0.000210711429552254
ARHGAP5	0.151259835382202	0.000001788556260539
ARHGDIA	0.196978773179019	0.000000000423872119817343
ARHGEF1	0.159304206205475	0.000000482459110846642
ARHGEF2	0.102475716789236	0.00125760864450435
ARID2	0.118933902904981	0.000178990492378517
ARID4B	0.132021250183029	0.000031446002503945
ARID5A	0.17401599621476	0.000000036942053790088
ARID5B	0.195851734864403	0.000000000534818714441983
ARIH1	0.120955086536835	0.000138347399917377
ARIH2	0.103643778083241	0.00110455505112123
ARL1	0.106785289265888	0.000774101402372596
ARL4A	0.110762605036396	0.000486881722235681
ARL6IP4	0.140478763235942	0.00000933634570382053
ARMC8	0.12512870145559	0.0000802561861816338
ARPC4	0.104589350692333	0.00099345736352154
ARPC5L	0.146346528891206	0.00000385408504583563
ARPP19	0.101275511827521	0.00143504491475938
ARRDC2	0.104843834848908	0.000965373573131703
ARSG	0.121206233471509	0.000133952333200914
ASAH1	0.135723711972098	0.0000186430202258343
ASH1L	0.207503976925992	0.0000000000452087429108198
ASXL1	0.100292621798895	0.00159721330168016
ATAD2	0.101799243476857	0.00135495919003986
ATF2	0.130736327148391	0.0000375815741589627
ATF4	0.235963858069655	0.0000000000000573964940513891
ATF6B	0.139327066367261	0.0000110617939648363
ATF7IP2	0.138183294875357	0.0000130735712760682
ATG12	0.136254274314743	0.0000172779774125332
ATG16L2	0.135705998296521	0.0000186903183371348
ATG2A	0.112882149161107	0.000377920107733292
ATG5	0.114698747551048	0.000303107831851629
ATL2	0.106321947660503	0.000816257486173398
ATM	0.190053524269438	0.0000000017307520388872
ATN1	0.116452930584627	0.000244210283348489
ATP1A1	0.1064061642654	0.000808440466287335
ATP1B3	0.12019206093044	0.000152546942481752
ATP2A3	0.103887101583489	0.00107491941365036
ATP2B1	0.110395284276504	0.000508509264891955
ATP5A1	0.13151373001078	0.000033746284269302
ATP5D	0.112416480043354	0.000399700186904738
ATP5E	0.15601926236116	0.00000083045746660271
ATP5G1	0.122711572983514	0.000110242361831362
ATP5G2	0.219003687199517	0.00000000000340829702723664
ATP5G3	0.102735773646003	0.00122193168257166
ATP5H	0.101597102118419	0.00138536854431765
ATP5I	0.21219880267335	0.000000000016017306328079
ATP5J2	0.110661725522434	0.000492734504089478
ATP5L	0.137059324224878	0.0000153868962041956
ATP5O	0.17653495356769	0.0000000232585705628603
ATP6V0E1	0.155060601949981	0.00000097104601657323
ATP6V1F	0.11980134586179	0.000160337683129324
ATP6V1H	0.102405430704465	0.00126741464134878
ATPIF1	0.118569739725487	0.000187412849808807
ATRX	0.187706602908526	0.00000000275552665178756
ATXN1	0.100991046314967	0.00148034769206636
ATXN7L3B	0.1251424125428	0.0000801104782448761
B2M	0.117092395786698	0.000225545693681943
B3GALT6	0.100527268499779	0.00155703655977236
B4GALT1	0.118616818615437	0.000186303449416089
BACH1	0.111301448191547	0.000456700646060959
BAG5	0.100617708099659	0.00154180095262594
BANK1	0.180920671075416	0.0000000102278091032087
BAP1	0.101860855928416	0.00134581344279159
BASP1	0.104752455328047	0.000975372246874715
BAX	0.12985099821707	0.0000424518305680909
BAZ1A	0.103792951354149	0.00108629825774785
BAZ1B	0.100230585355471	0.00160799343534533
BBC3	0.124191748186741	0.0000908275767675439
BBX	0.168065060814918	0.000000107331364920515
BCL10	0.152266389370068	0.0000015236258008564
BCL2	0.270027414756011	0.00000000000000000572860705022899
BCL2A1	0.142466881435873	0.00000694505286674237
BCL3	0.113859826876147	0.000335747370147124
BCLAF1	0.117434577228367	0.000216115805729325
BDP1	0.173268897790884	0.0000000423213180281768
BECN1	0.105994060535535	0.000847363903455612
BHLHE41	0.158156248049285	0.000000584025673657391
BIRC6	0.135211829310643	0.0000200567722378873
BLM	0.121331541161588	0.000131808893109838
BOD1L1	0.124973337012862	0.0000819248173135965
BOLA2B	0.105442264874785	0.000902201466195676
BPTF	0.116403377972111	0.000245715430115274
BRCA2	0.110206677465378	0.00051995858859211
BRD2	0.172773600965704	0.0000000462976167076327
BRD4	0.108969607348421	0.000601206703404098
BRD9	0.175212207324126	0.000000029679811565605
BRE	0.115540547612324	0.00027335727513846
BRPF3	0.115472675752757	0.000275650755608399
BRWD1	0.10306841133415	0.00117765790850898
BTF3	0.157658687898377	0.000000634177764921637
BTG1	0.180143141858338	0.0000000118490698219938
BTG2	0.141643897511781	0.00000785378109898637
BTG3	0.108893237101497	0.000606590350602608
BTK	0.104269050616379	0.00102987769051775
C10orf118	0.114658585172758	0.000304600257383816
C11orf1	0.102784604703843	0.00121533758753344
C11orf31	0.11947765229215	0.000167073613008839
C11orf58	0.173475770092098	0.0000000407602641838652
C14orf166	0.101397518252631	0.00141600857038598
C14orf2	0.23170174243551	0.000000000000165190845953886
C17orf62	0.128159888024155	0.0000534620322129272
C19orf24	0.102109301195806	0.00130950824309854
C19orf43	0.12709987077299	0.0000616869479303739
C1D	0.149932734452088	0.00000220603656478112
C1orf172	0.113127881651704	0.000366878299284232
C1orf43	0.117026780405472	0.000227397437324642
C1orf86	0.118935000725013	0.000178965647928495
C1QBP	0.105616378979584	0.000884553121576778
C21orf2	0.100302589835438	0.00159548735348573
C22orf46	0.128838761234194	0.0000487517189688364
C2orf49	0.143033660812257	0.00000637859049020245
C5orf28	0.11103115150157	0.000471615340465072
C6orf48	0.236464277429632	0.0000000000000506276055821017
C6orf62	0.156132748898644	0.000000815172598832521
C7orf50	0.110703564420843	0.00049029920832973
C7orf55	0.102623347302352	0.00123723924346184
C7orf55-LUC7L2	0.110532424962045	0.000500332007297313
C8orf33	0.146500136460042	0.00000376408034531828
C8orf59	0.199817729493742	0.000000000234549216979606
CACUL1	0.102037893679308	0.00131984947676546
CALM1	0.145201911469503	0.00000459266817095366
CALM2	0.156490683413968	0.000000768716393510727
CALR	0.16705246636287	0.000000128215956794502
CAMTA1	0.120840518645893	0.000140397066261919
CANX	0.124916634145096	0.0000825419266944713
CAPN7	0.152528977779188	0.00000146096849183459
CAPNS1	0.128108110465891	0.0000538384259724932
CARD8	0.106051408274414	0.000841845348571614
CASP6	0.120461824995971	0.000147377102843822
CAST	0.132967632824561	0.0000275482917846192
CBFB	0.111014293325327	0.000472560425836307
CBWD6	0.107896771018402	0.000681065589861126
CBX3	0.16199780197642	0.000000306516341955622
CBY1	0.108074020746456	0.000667226345569002
CCAR2	0.113813829175695	0.000337628670384267
CCBL2	0.13735375778078	0.000014745818426462
CCDC107	0.13115448975678	0.0000354700055834715
CCDC141	0.124331314373631	0.0000891736794149855
CCDC174	0.130819728270109	0.0000371511403591843
CCDC50	0.110236072502277	0.000518158529775971
CCDC59	0.127348915408571	0.0000596534309703133
CCDC82	0.110254732190946	0.000517018880607688
CCL4	0.102322763169591	0.00127903822076103
CCND2	0.114783987922787	0.000299962944023874
CCND3	0.125663697895319	0.0000747523804849651
CCNH	0.120918264493142	0.000139003072089587
CCNI	0.109350088405731	0.000575040554394544
CCNL1	0.186779030712431	0.00000000330614058867233
CCT8	0.115211817359003	0.000284634162990936
CCZ1B	0.110180922570692	0.000521540517939037
CD180	-0.121131	0.000135254742351187
CD19	0.100706567760754	0.00152696513353144
CD27	0.187405449995469	0.00000000292371589709042
CD44	0.237005496881711	0.0000000000000441880740261525
CD46	0.112012893495186	0.000419518065596994
CD47	0.166096253739583	0.000000151506686142142
CD48	0.20980490785033	0.0000000000272703584677409
CD52	-0.110247	0.000517517744364171
CD55	0.14749300780263	0.000003229051147971
CD63	0.113770176141851	0.000339423177604008
CD69	0.177431231954282	0.0000000196963226476264
CD70	0.119874340499171	0.000158854366849129
CD81	0.157997418905113	0.000000599604973706638
CD83	0.138295892198269	0.0000128610260580215
CD96	-0.113155	0.000365697047745842
CD97	0.224549748153065	0.000000000000929258298707214
CD99	0.103048216815382	0.0011803030019534
CDC123	0.139996481935735	0.000010025091718034
CDC26	0.148687425227164	0.00000268162664068507
CDC42	0.260764263198991	0.0000000000000000804114806141417
CDC42SE1	0.10716772901623	0.00074083602532975
CDC42SE2	0.250759585695167	0.00000000000000124241092475046
CDIPT	0.102562148625687	0.00124564596489269
CDK11A	0.112316091833437	0.000404546414196675
CDK11B	0.112231369038124	0.000408678983232241
CDK12	0.116815461656668	0.000233458394159691
CDS2	0.134978350888788	0.0000207349306804365
CDV3	0.175195462892609	0.0000000297711969578201
CEBPZ	0.125438939246806	0.0000770197139592921
CELF2	0.180886558846233	0.0000000102941855737085
CENPC	0.113753303799868	0.00034011915723907
CEP57	0.106437636989734	0.00080553700132248
CEPT1	0.121651330252138	0.00012648410610319
CFLAR	0.280239178012698	0.000000000000000000275837145097468
CHCHD10	0.185650448546532	0.00000000412138762269403
CHCHD2	0.223410443440834	0.00000000000121704820152424
CHD2	0.225758937163631	0.000000000000696755691649353
CHD4	0.107648724948534	0.000700880116243348
CHD6	0.152790550112923	0.00000140101728602032
CHD9	0.134725067650367	0.0000214952439785295
CHERP	0.103871815359605	0.00107675936456859
CHIC2	0.121125264152482	0.000135354740868544
CHMP4A	0.112473590724051	0.00039696740002934
CHMP4B	0.103513488271348	0.00112073210616579
CHMP7	0.108718422762739	0.000619082795794279
CHPT1	0.172948173972848	0.0000000448565237283503
CHSY1	0.100089019223663	0.00163284438850352
CHURC1	0.153450541293587	0.00000126006604856316
CIR1	0.114372405686219	0.000315435195579772
CIRBP	0.194391305077004	0.000000000721368632910275
CISD2	0.106591002243872	0.000791526288127961
CKLF	0.10543965837511	0.000902468121475878
CLECL1	0.130604958694688	0.0000382691677995158
CLIP1	0.167849177986307	0.000000111487912268322
CLNK	0.115581676036612	0.000271976193059569
CLSTN1	0.142441262404926	0.00000697176027377312
CLTA	0.111144587785839	0.000465301631360695
CMIP	0.104166387280449	0.00104180981941499
CMPK1	0.154903551162603	0.000000996157499816976
CMSS1	0.186577816165063	0.00000000343899032320947
CMTM6	0.148923474634174	0.00000258451952729442
CMTM7	0.148262525540298	0.00000286530108749948
CNBP	0.11742490758215	0.000216377130222984
CNOT6L	0.182833773824717	0.00000000710174671241985
CNPY3	0.106758135559026	0.000776515156119035
CNR1	0.144012996085377	0.00000550231339226015
CNTRL	0.120377410994079	0.000148976860331273
COBLL1	0.118126828702703	0.000198157792707151
COIL	0.144978119342189	0.00000475209447231186
COL4A3	0.13315176230071	0.0000268452863820259
COL4A3BP	0.111138737572395	0.000465625311026886
COMMD2	0.102217567743674	0.00129397142669592
COMMD3	0.102989609549751	0.00118801049339284
COMMD6	0.241774026843549	0.0000000000000131339281597424
COPA	0.148048364374026	0.000002962387645762
COQ10B	0.138570663799018	0.0000123560830823125
COQ7	0.123832877349871	0.0000952141222672646
COTL1	0.123709704362182	0.0000967651880243111
COX16	0.15169135239125	0.00000166997216289424
COX17	0.162270404016001	0.000000292640286897414
COX20	0.111944984128504	0.000422941439053503
COX4I1	0.162275219630828	0.000000292400691029786
COX5B	0.104339781683601	0.00102173052554936
COX6A1	0.195582396211583	0.00000000056525984266328
COX6B1	0.140884215014919	0.00000879247471469702
COX6C	0.184382826793643	0.00000000527051699215967
COX7A2	0.269451043024464	0.00000000000000000677253492012925
COX7B	0.108965082352504	0.000601524447027479
COX7C	0.315903810437054	0.00000000000000000000000246448795405238
COX8A	0.17343600302133	0.000000041055951703553
CR1	0.129879816826927	0.0000422842938914963
CREB1	0.120226763207192	0.000151872472125808
CREBBP	0.165988511985878	0.000000154373831038682
CREBRF	0.180252270279845	0.0000000116073291047285
CREBZF	0.156029613927079	0.000000829051928429852
CREM	0.105586339933005	0.000887574912358498
CRIP1	0.293966224478744	0.00000000000000000000381096473975506
CRLS1	0.12283919994639	0.000108425459638094
CRNKL1	0.110028085485735	0.000531020674641587
CROCCP2	0.132522973905679	0.0000293187627762984
CRTC2	0.10131086326573	0.00142950502571738
CSNK1A1	0.14089466770044	0.00000877886139211911
CSNK1D	0.145825349570037	0.0000041750667549497
CSNK2A1	0.157450611734447	0.000000656357915140541
CTA-250D10.23	0.256071330694072	0.000000000000000294752568026224
CTC-444N24.11	0.135421412692675	0.0000194660277512402
CTNNB1	0.126696795366889	0.0000651176224275821
CTSB	0.135841512439065	0.000018331359610401
CTSS	0.121941833349393	0.00012182305280096
CUL3	0.102077184692507	0.00131415008062666
CUX1	0.107596897408916	0.000705087212643032
CWF19L2	0.188209578574977	0.00000000249537667557089
CXCR4	0.319048900354931	0.000000000000000000000000816603903378029
CYB5R3	0.11014542245903	0.000523728364891603
CYB5R4	0.137769417159304	0.0000138839455165235
CYBA	0.134293611789711	0.0000228517739049541
CYCS	0.181536867753232	0.00000000909791891761074
CYLD	0.121237711684184	0.000133410822361734
CYSTM1	0.158215428376904	0.000000578321005069018
CYTH1	0.16393014158307	0.000000220350644579078
CYTIP	0.174208747214746	0.0000000356654601395197
DAP3	0.113248936632264	0.000361550202215954
DAPP1	0.125230578579819	0.0000791794845691637
DARS	0.119004509561251	0.000177399188897833
DAZAP1	0.108918474434915	0.000604806332925895
DBNL	0.115890518433497	0.000261812071856949
DCAF13	0.110773089459888	0.000486277169687649
DCAF5	0.10049569085614	0.00156238870343302
DDIT3	0.120277032489271	0.000150900412374611
DDIT4	0.232890059718553	0.000000000000123280369989275
DDX17	0.105013812551543	0.000947026451259777
DDX18	0.174643597691743	0.000000032940390922209
DDX21	0.168719093585652	0.0000000956326613206126
DDX24	0.12756739285193	0.0000579218504982557
DDX27	0.156069611258302	0.000000823642546079446
DDX39B	0.109951057725168	0.000535859075933623
DDX3X	0.213517848118755	0.0000000000119143858103477
DDX3Y	-0.124564	0.0000864825234480666
DDX5	0.234416365359197	0.0000000000000844545012000394
DDX50	0.151481009281874	0.0000017268012010737
DEK	0.170488666684846	0.0000000698272585978647
DENND3	0.106266986690175	0.000821396684245894
DENND4A	0.112929763144785	0.000375756675134642
DERL1	0.10914121412232	0.000589271031301078
DERL2	0.106494245339888	0.000800338994219589
DERL3	0.104973366836756	0.000951362620354732
DEXI	0.109057587232198	0.000595059701333226
DGUOK	0.129622250135126	0.0000438041369473535
DHRS12	0.125546399983312	0.0000759276834244687
DHRS4	0.105014759098966	0.000946925191538335
DHX36	0.112736914959239	0.000384591126639897
DHX9	0.11969524523872	0.000162516963582925
DIDO1	0.109261663280519	0.000581025452616084
DMWD	0.123715995918059	0.0000966853872097214
DNAJA1	0.13057291355022	0.0000384386947176318
DNAJB14	0.152739105539536	0.00000141261836811547
DNAJB4	0.116687049830144	0.000237215041420888
DNAJB6	0.110041362709374	0.000530190801001537
DNAJC11	0.113971199469495	0.000331232730910186
DNAJC14	0.117235276860501	0.000221562203833984
DNAJC15	0.11792656104853	0.000203203644204981
DNAJC24	0.126892097387955	0.000063433438468696
DNAJC4	0.106239258635694	0.000824000792811952
DNPEP	0.110156578590917	0.000523039901789319
DOCK2	0.161965855715486	0.000000308183408360843
DOCK8	0.12513911718324	0.0000801454752711393
DRAM2	0.125898142278985	0.0000724545818993324
DUS1L	0.113839522269902	0.000336576615410515
DUSP1	0.142617156092153	0.00000679035088410632
DUSP2	0.177057824863723	0.0000000211110092905638
DUSP22	0.11931957643441	0.000170458869750174
DUT	0.108304461591724	0.000649624290113347
DYNC1H1	0.100689928105026	0.00152973322489628
DYNC1I2	0.11150246471154	0.000445894989223015
DYNC1LI2	0.121337392854576	0.000131709590418511
DYNLL2	0.127647099800337	0.0000573020371688917
DYNLRB1	0.121040404847732	0.000136839339740207
E2F4	0.122824485977223	0.000108633480408222
EAF2	-0.161516	0.000000332587034002326
EAPP	0.108176037012052	0.000659379985743684
EBF1	0.133481121144192	0.0000256300793290054
EBNA1BP2	0.118294848361172	0.000194015370406962
EBP	0.167843985804921	0.000000111589771968681
EDEM1	0.148824327292333	0.00000262488954402342
EDF1	0.136195482466304	0.0000174244173470458
EEF1B2	0.11889626706164	0.00017984417925247
EEF1G	0.191797859479842	0.00000000122026858698227
EEF2	0.181921250894012	0.0000000084554935826063
EHD1	0.109915653600606	0.000538096671286944
EHMT1	0.208910311359537	0.0000000000332158964773138
EID1	0.118261172383385	0.000194839064135849
EIF1	0.111339430720208	0.000454640379499741
EIF1AX	0.233207447855896	0.00000000000011398036578072
EIF1AY	-0.120506	0.000146537319323104
EIF1B	0.123976588200127	0.0000934340658536089
EIF2A	0.147774169630026	0.0000030912962091788
EIF2B1	0.13634076412738	0.0000170646735562684
EIF2S2	0.123231841046908	0.000103011096061497
EIF2S3	0.22080660096461	0.00000000000224239128441908
EIF3B	0.113889926859651	0.000334521590583614
EIF3E	0.239704496752575	0.0000000000000223088082647367
EIF3G	0.152980650705192	0.00000135893687658116
EIF3I	0.125659287116479	0.000074796263066801
EIF3J	0.17504038948671	0.0000000306305883895409
EIF3K	0.110818282780113	0.000483679225519873
EIF3M	0.116009048956768	0.00025800647660986
EIF4A1	0.208668094221902	0.0000000000350325307812441
EIF4A2	0.156299907010615	0.000000793150748883481
EIF4B	0.13468174316483	0.0000216279223003988
EIF4E	0.156623790333184	0.000000752098802273259
EIF4E2	0.100263994066795	0.00160217968983739
EIF4G2	0.152764272931306	0.00000140693148237407
EIF5	0.213044107300227	0.0000000000132533610090824
EIF5B	0.162803668807955	0.000000267226517266653
ELF1	0.156978058319487	0.000000709537087343161
ELMO1	0.165851147222602	0.000000158105332640808
ELOF1	0.1046156185894	0.000990523979150182
EMB	0.140115651232283	0.00000985053349524435
EMC1	0.118970260971494	0.000178169403195682
EMC2	0.100489487915328	0.00156344203505994
EMILIN2	0.10154179632559	0.00139379733977714
EML4	0.136196055905961	0.0000174229833261487
EMP3	0.121236316284716	0.000133434783338945
ENO1	0.191584875066892	0.00000000127369104906366
ENTPD1	0.154747459215765	0.00000102173346551521
EP300	0.154002522813402	0.00000115273798447764
EPB41	0.109374821917636	0.000573376797406589
EPB41L4A-AS1	0.17498298956567	0.0000000309547433829282
EPC1	0.103556524510203	0.00111536460308779
EPM2AIP1	0.104125755219729	0.00104656749391691
EPS15	0.14668813820453	0.00000365665908767207
EPT1	0.126489317820452	0.0000669530477258095
ERAP2	0.108973083930962	0.000600962684962496
ERCC1	0.187075025046482	0.00000000311973826086223
ERCC5	0.126474214706365	0.0000670885468450499
ERF	0.140075284343006	0.00000990933536964359
ERGIC1	0.130147908518121	0.0000407554769166904
ERH	0.136896537679872	0.0000157526360214735
ERICH1	0.127481793395097	0.0000585945426485471
ERP29	0.13162900538039	0.0000332102136016549
ESCO1	0.149404202274972	0.00000239707201808572
ETF1	0.142683196627628	0.00000672341074314133
ETNK1	0.151380483148655	0.00000175461161973186
ETV6	0.190054209394241	0.00000000173051559170902
ETV7	-0.100507	0.00156046681046268
EXOC1	0.132471069723849	0.0000295323271115591
EZR	0.216417374459706	0.00000000000617457239212238
FADS3	0.138352461851175	0.0000127554883069151
FAM102A	0.135470075644483	0.0000193312499425145
FAM107B	0.128352635303959	0.0000520826366083067
FAM126B	0.11270972542788	0.000385852166441975
FAM134B	0.13054963995583	0.0000385622638329453
FAM13B	0.136710473196179	0.0000161808082599599
FAM162A	0.115621050494134	0.000270660129372678
FAM172A	0.120696212992369	0.00014301940203011
FAM177A1	0.125146868680105	0.0000800631765902686
FAM208A	0.100990402943271	0.00148045162760503
FAM214A	0.124427307043282	0.0000880526728688784
FAM219B	0.107295975654376	0.000729981061665006
FAM3C	-0.104833	0.000966555738518482
FAM49A	0.13235449996699	0.0000300173573688558
FAM49B	0.114301349042437	0.000318180725242571
FAM53B	0.109951015186594	0.000535861759235303
FAM65A	0.135494056122725	0.0000192651600188216
FAM76B	0.100816287069227	0.00150882779606176
FAR1	0.136584106956134	0.0000164778937650743
FAU	0.111255430660786	0.000459208404535992
FBLN7	0.103410265008072	0.00113370349942465
FBXO3	0.11668899443226	0.000237157732789048
FBXW11	0.134952273164421	0.0000208120148391069
FBXW4	0.139637977781332	0.0000105681878577596
FBXW7	0.128944676676387	0.0000480532450382398
FCRL5	-0.104857	0.000963929181248596
FGD2	0.114582962964404	0.000307429027888027
FIBP	0.109589006120984	0.000559155254213919
FKBP11	0.118567495284067	0.000187465893948671
FKBP5	0.114917653227234	0.000295092824296742
FKBPL	0.104238315167921	0.00103343663185153
FN3KRP	0.111837482000404	0.00042841401413776
FNBP1	0.210206151552418	0.0000000000249544496476244
FNBP4	0.186812876513358	0.00000000328428999887966
FOSB	0.144047213443711	0.00000547388059804411
FTH1	0.147042952956738	0.00000346186707273558
FUBP1	0.139791641054019	0.0000103320549680106
FUS	0.14821358230784	0.0000028872162740738
FXR1	0.153764612993351	0.00000119787433598875
FZR1	0.101003015931569	0.0014784152459413
G3BP2	0.183827543375952	0.00000000586687293827749
GADD45B	0.103615784517286	0.0011080124960664
GADD45GIP1	0.117711362036572	0.000208759889738697
GALK1	0.101886324482196	0.00134204953083209
GAPDH	0.15690786120103	0.000000717782115320928
GAPVD1	0.102945629655442	0.00119382479212955
GARS	0.105083620836754	0.00093958531025434
GART	0.104875525868819	0.000961928161394885
GBAS	0.107726711828252	0.00069459341353639
GCC2	0.185551395658548	0.00000000420161749975689
GDI1	0.108423497115007	0.000640701683610215
GFER	0.113303632756212	0.000359166587395996
GGA2	0.138197963873376	0.0000130456928631733
GID8	0.11724504278589	0.000221292354220248
GINM1	0.130553969606226	0.000038539247465297
GIT2	0.126895256090533	0.0000634065408226446
GLO1	0.133811104257533	0.0000244650777169934
GLS	0.157885533375267	0.000000610818960267561
GLTSCR2	0.176521057306023	0.00000002331844056407
GMIP	0.102913370378781	0.00119810625965252
GNAS	0.107498766808181	0.00071311720728491
GNB1	0.15719601133417	0.000000684513906575518
GNG5	0.120255909224397	0.000151308159482294
GNL3	0.109335464461581	0.000576026378179277
GNPAT	0.101508404853468	0.00139890915011741
GNPTAB	0.128529251024701	0.000050848313103594
GOLGB1	0.147287447400093	0.00000333346512162247
GPATCH2	0.110920582151969	0.000477846199859482
GPBP1	0.105169331008535	0.00093052309630081
GPBP1L1	0.132351905774409	0.0000300282369446753
GPD2	0.121189678386866	0.00013423795470064
GPR183	0.213201225648205	0.0000000000127937412413159
GPS2	0.100716852965534	0.00152525644188521
GPX4	0.13704727079958	0.000015413697657539
GRAMD4	0.129534258555419	0.0000443351082647962
GRASP	0.131149563137163	0.0000354942150090526
GRB2	0.124117147127626	0.0000917234421244676
GRN	0.138196732160505	0.0000130480315523182
GSPT1	0.106724563061969	0.000779509135090479
GSTK1	0.121653285881876	0.000126452174797976
GTDC1	0.107731502699266	0.000694208921569199
GTF3C3	0.102846507954933	0.00120702541115348
GUK1	0.109000115572622	0.000599068494186517
GYPC	0.154366073021412	0.00000108690655523499
H2AFZ	0.123712373435873	0.0000967313264561268
HADHA	0.109681011325998	0.000553147537336847
HADHB	0.157423002762162	0.000000659356434836225
HAUS4	0.102293873830643	0.00128312335809927
HBA1	-0.160277	0.000000409934146850771
HBA2	-0.238783	0.0000000000000281964257064553
HBB	-0.327785	0.0000000000000000000000000354223020443948
HCLS1	0.11142971061417	0.000449778077974267
HCST	0.106218153721969	0.000825988005776315
HECA	0.127690467019275	0.0000569674472103056
HELLS	0.114405954349386	0.00031414663221469
HELQ	0.107832939172024	0.000686114341543074
HERPUD1	0.212204902894989	0.0000000000159954717836332
HERPUD2	0.114229539388556	0.00032097802962811
HGSNAT	0.129864594800399	0.0000423727087794546
HIF1A	0.147400774515108	0.00000327550749351011
HINT1	0.11801585004364	0.000200939251470456
HIP1R	0.11129880682732	0.000456844243223341
HIPK2	0.172871654522411	0.0000000454827622053018
HIST1H2AG	0.110293812577459	0.000514639582826009
HIST1H2AH	0.123837515347671	0.0000951561783705917
HIST1H2BC	0.114847899436098	0.000297625014391738
HIST1H2BD	0.115785916671519	0.000265214049348358
HIST1H2BI	0.117465481907477	0.000215282582115081
HIST1H3D	0.149296767058606	0.00000243779743379149
HIST1H4B	0.104907031578407	0.000958514171368786
HIST1H4C	0.247768438891574	0.00000000000000275258751848703
HIST1H4E	0.110822829122972	0.000483418595143959
HIST2H2BE	0.115531369843918	0.000273666356632727
HIVEP1	0.150842690071404	0.00000191084385320461
HLA-A	0.141856301433549	0.00000760894356160202
HLA-B	0.123516616192475	0.0000992446910019335
HLA-DQB1	0.115667614314952	0.000269111458407534
HLA-DRB1	0.287382502791235	0.0000000000000000000306035315759838
HLA-F	0.190025393830645	0.00000000174048747605514
HMG20A	0.131420904374541	0.0000341839102400797
HMGB1	0.243623681369617	0.00000000000000814571648570265
HMGB2	0.178255250128295	0.0000000168920588482096
HMGN1	0.148812942812636	0.00000262956347543141
HMGN2	0.155403261282005	0.000000918351617743977
HMGXB4	0.114960953211208	0.000293531106445952
HNRNPA0	0.103733969237061	0.00109348330438506
HNRNPA1	0.320746204749955	0.000000000000000000000000447445509640365
HNRNPA2B1	0.217177740124451	0.00000000000518887072005101
HNRNPA3	0.145481589252986	0.00000440061344639105
HNRNPAB	0.126431169828678	0.0000674761512803774
HNRNPC	0.145144331211924	0.00000463319162099726
HNRNPD	0.133792034779206	0.0000245310095144624
HNRNPDL	0.100862898311498	0.00150118278924489
HNRNPF	0.141995277461635	0.00000745270849086922
HNRNPH1	0.215046752424201	0.00000000000843441420321161
HNRNPK	0.203829155495156	0.000000000100134172261672
HNRNPL	0.162308748887947	0.000000290737713270078
HNRNPM	0.160545100661376	0.000000391838830252828
HNRNPR	0.17822567133496	0.0000000169856561079963
HNRNPU	0.155138488689878	0.000000958819205294823
HNRNPU-AS1	0.113820661431158	0.000337348610620228
HNRNPUL1	0.158812024439503	0.000000523728752633678
HPS1	0.125317145008306	0.0000782753255803726
HPS4	0.121945236465442	0.000121769421264756
HSCB	0.101241462183722	0.00144039947653571
HSD17B7	0.111294415595803	0.000457083064626967
HSH2D	0.1415393397143	0.00000797704937976877
HSP90AB1	0.185052743701385	0.0000000046291253167961
HSPA9	0.102307969810994	0.00128112859633677
HSPD1	0.174142193044969	0.0000000361013440566181
HSPE1	0.228508228782863	0.000000000000359803719682222
HTATSF1	0.111684530211487	0.000436314136337403
IARS	0.123485751930117	0.0000996465370538803
ID3	0.121285622048238	0.000132590584992509
IDI1	0.156666154216832	0.00000074688280669616
IDS	0.174123591008389	0.0000000362240941386148
IER5	0.13120734818592	0.0000352112423067504
IFI16	0.120965767527132	0.000138157753687939
IFITM1	0.154171765869323	0.00000112162858461131
IFITM2	0.158935785069347	0.000000513042519357094
IFNGR1	0.102557205175387	0.00124632732902448
IFT57	0.155507010055945	0.000000902946829320236
IGBP1	0.114036492312878	0.000328612436252013
IGLL5	-0.104777	0.000972723378367253
IK	0.16664753320734	0.000000137622758102136
IKBKB	0.103460876481842	0.00112732626849378
IKBKG	0.142642039145962	0.00000676505447610148
IKZF1	0.112422439372912	0.000399414210807523
IL10RA	0.100670960142119	0.00153289427018865
IL13RA1	0.12262726323767	0.000111458287545293
IL16	0.102326539146753	0.0012785051601596
IL1RAP	0.102240487802101	0.00129070414424177
IL3RA	-0.107519	0.000711487990923781
IL4R	-0.111245	0.000459770601955054
ILF2	0.128006770852321	0.0000545823747302579
ILKAP	0.105419438189034	0.000904539205738771
IMPAD1	0.132656529492268	0.0000287759542359141
INF2	0.111106417358892	0.00046741730216936
INO80B	0.129177538743997	0.0000465507687511836
INPP5D	0.149643304788323	0.00000230876343373997
INSR	0.146185093180937	0.0000039508950068116
IPMK	0.131366998141618	0.000034440515514263
IPO8	0.105624678994737	0.000883719858656559
IQGAP1	0.106441159041409	0.00080521268198152
IRAK1BP1	0.121439231490374	0.000129992629997954
IRF2	0.113834252110554	0.000336792162603891
IRF3	0.116318642814791	0.000248309386390337
IRF9	0.106174005889658	0.000830159275563466
ISOC2	0.114928196676042	0.000294711835383537
IST1	0.118027314408438	0.000200650232820081
ITGAL	0.171356149758753	0.0000000597791499065054
JAK3	0.121343762454089	0.000131601578911727
JMJD1C	0.184585042001075	0.00000000506832600586089
JMJD6	0.105334361863396	0.000913301557612603
JMJD8	0.117993269872167	0.000201509643953916
JOSD1	0.128056848926194	0.0000542135371946503
JPX	0.10346520399517	0.00112678252558183
JUN	0.198804157485387	0.000000000290019025882372
JUNB	0.202864088951998	0.000000000123086790056677
JUND	0.277406307712151	0.000000000000000000648189808527575
KANSL1	0.114680669896727	0.000303778745533039
KARS	0.124447111515377	0.0000878230556472273
KAT6B	0.134321446585606	0.0000227618596358942
KB-431C1.4	0.106985152938082	0.000756547923202521
KDELR1	0.104997661033911	0.000948755852052874
KDM2A	0.100880670211186	0.00149827730164712
KDM4B	0.110776529533966	0.000486078960580539
KDM4C	0.124265844640772	0.0000899459445553626
KDM5A	0.136093898700162	0.0000176802310830761
KDM6A	0.107469987309723	0.000715488264278303
KDM6B	0.142278021808132	0.00000714425347798487
KDSR	0.108347398520194	0.000646392624656165
KHDRBS1	0.13609898436551	0.000017667339575368
KIAA0020	0.1152541089695	0.000283159365025736
KIAA0226	0.116396100769483	0.000245937203412703
KIAA0355	0.132919357273148	0.0000277354791993398
KIAA0947	0.127305506948348	0.0000600032505019936
KIAA1033	0.102432202498102	0.00126367128112145
KIAA1430	0.143849404922881	0.0000056402109139822
KIAA1432	0.101384172437433	0.00141807950148569
KIAA1551	0.314001539350519	0.00000000000000000000000477643967249403
KIF2A	0.100651937921111	0.00153607038951728
KLF13	0.102040286505853	0.00131950173279743
KLF6	0.167451968062039	0.000000119545589638916
KLF7	0.109226378430202	0.000583429768364079
KLHDC1	0.100019552327555	0.00164516745674448
KLHL24	0.11169133636856	0.00043595972356278
KLHL28	0.10423598279614	0.00103370716690588
KLHL6	0.112664587334228	0.000387954176381291
KMT2A	0.127519272700168	0.0000582991035307174
KMT2E	0.136329869073948	0.0000170914046801321
KMT2E-AS1	0.129985511442342	0.0000416751847930015
KPNA4	0.107263720651181	0.000732697194935685
KPNB1	0.110624845842907	0.000494890475324015
KRAS	0.205210673175747	0.0000000000743881277034345
KRR1	0.102507960075607	0.00125313365094693
KRT10	0.109395999984476	0.000571955763523378
KRT18	0.103474036498479	0.00112567349141917
KRTCAP2	0.156234095912892	0.000000801751714914174
KTN1	0.238121755290844	0.0000000000000333415046658441
LAIR1	-0.107357	0.000724853280176284
LAMP1	0.186947300396519	0.00000000319888468280443
LAMTOR5	0.157007721435447	0.000000706080448857151
LAPTM4A	0.128644965133033	0.0000500546817712303
LARP1	0.108503949304588	0.000634735790985621
LARP1B	0.100902185497139	0.0014947667388125
LARP7	0.129410055605616	0.0000450949741570838
LCP1	0.185993594755905	0.0000000038547986351185
LDB1	0.11518429610839	0.000285597743592918
LDHB	0.14898858919555	0.00000255833114850703
LENG8	0.116229837891002	0.00025105543690026
LETMD1	0.132785171643788	0.0000282621443540365
LGALS1	0.106268420600335	0.0008212622246489
LIN7B	0.129129628833471	0.0000468562122043968
LINC-PINT	0.241163367566501	0.0000000000000153641876173867
LINC00152	0.127900801919361	0.0000553707032197539
LINC00441	0.10742619692253	0.000719110057298571
LINC00657	0.145907572769756	0.00000412278155669599
LINC00936	0.115255176740387	0.000283122222287788
LINC00969	0.105321393799064	0.000914644068103406
LIPT2	0.108381116551223	0.000643865295424435
LMAN1	0.103770736447052	0.00108899928574788
LMO2	-0.115358	0.000279578153660109
LMO4	0.183255541513757	0.00000000654956468997778
LPAR5	0.102873683086025	0.00120339300743167
LPAR6	0.101776608384717	0.00135833349495167
LPIN1	0.109614899839431	0.000557458350214459
LPXN	0.102616435227369	0.00123818611177753
LRPAP1	0.122808478289032	0.000108860218297294
LRRC40	0.116621332781513	0.00023915940895107
LRRC41	0.110106125449453	0.000526160169843959
LRRFIP1	0.108068406562608	0.000667660654586505
LSM14A	0.13430353568634	0.0000228196782657886
LSM14B	0.104659094254054	0.000985686559328857
LSM5	0.12472977871859	0.0000846067045641564
LSM7	0.168352379385329	0.000000102031085068153
LTB	-0.149945	0.00000220182973300663
LUC7L	0.101442137847101	0.00140910494140279
LUC7L3	0.107009980324262	0.000754393359597049
LY75	0.103475087457376	0.00112554159714166
LY86	0.234318590424157	0.0000000000000865328053933986
LY9	0.136918167031513	0.0000157035680424945
LY96	0.158455799297624	0.000000555697017019989
LYN	0.133460500695653	0.0000257046017485312
LYRM1	0.100242654726983	0.00160589090390549
M6PR	0.122731032489718	0.000109963494712351
MAFK	0.100949729838058	0.00148703593930585
MAGOH	0.100832219859515	0.0015062105383795
MALAT1	0.284390433633494	0.0000000000000000000774648045695529
MAN1A2	0.107761214850596	0.000691828776407406
MAN2A1	0.114891950106038	0.000296023541059434
MAP1LC3B	0.123510969368418	0.00009931809708005
MAP3K2	0.108728757383525	0.000618337673907957
MAP3K7	0.114280727096567	0.000318981700430187
MAP4K1	0.100747334026218	0.00152020291455991
MAPK6	0.104998667828541	0.000948647965643827
MAPRE1	0.11139109177894	0.00045185205307054
MARC2	0.106889309181791	0.000764919046366867
MARCKS	0.226099221785776	0.000000000000642329964930966
MASTL	0.132435881757575	0.0000296779499220796
MAT2B	0.115652903886337	0.000269599815630432
MATR3	0.169868646550477	0.0000000779905654360169
MAU2	0.10140237956393	0.00141525491052308
MBNL1	0.131264168700567	0.0000349350796864439
MBP	0.174705281128529	0.0000000325705596062278
MBTPS1	0.114439295493087	0.000312870915591831
MCOLN2	0.118084663771899	0.000199210290534003
MDFIC	0.121555960968407	0.000128050525795699
MDH2	0.164158936737396	0.000000211851272441484
MDM2	0.105783789094424	0.000867886130469486
MECP2	0.135102279851526	0.0000203722993178398
MED13	0.124987893806231	0.000081767096448469
MED28	0.128500838649889	0.0000510449938570719
MEF2A	0.138795287255088	0.0000119573861998412
METRN	0.131111222701116	0.0000356831561530762
METRNL	0.106008358810227	0.00084598485865863
METTL10	0.126520672397113	0.0000666725721623728
METTL16	0.117601156981807	0.000211660144346574
MFN1	0.141480939989574	0.0000080467012243764
MGAT5	0.180014508602551	0.0000000121402933376316
MGEA5	0.1033391439078	0.0011427213034745
MGMT	0.103678758903675	0.00110024862177533
MIA3	0.108770253689941	0.000615354188774578
MIDN	0.183482883414733	0.00000000626946091696928
MIER1	0.12041280056765	0.000148304203729063
MIF	0.345352804695281	0.0000000000000000000000000000469122690868424
MINOS1	0.182422645931656	0.00000000768337329729567
MIR142	0.141691591830415	0.00000779815780198203
MIR155HG	0.116445641918977	0.000244431131520809
MIR24-2	0.102855769402104	0.00120578633182089
MIR29A	0.126365160931101	0.0000680746513588243
MKNK1	0.104870758844983	0.000962445699181032
MKNK2	0.142448276105487	0.00000696443887496069
MLLT6	0.123778419282302	0.0000958969764897158
MNAT1	0.102467644019303	0.00125873135483385
MOB1A	0.176314262796158	0.0000000242272301951081
MORF4L1	0.13521793192436	0.0000200393326720596
MORF4L2	0.106779723490586	0.000774595589190217
MPHOSPH8	0.160839347769197	0.000000372890346147283
MPLKIP	0.115098758263203	0.000288612132376086
MRFAP1	0.117583381093587	0.000212131474123172
MRGBP	0.108066729148797	0.000667790468962154
MRPL11	0.179214799732485	0.0000000141128790901555
MRPL2	0.125159878030557	0.0000799252338192596
MRPL3	0.141723441431312	0.00000776122297033708
MRPL41	0.114051909086284	0.000327996572173997
MRPS15	0.103255586189459	0.00115340056984811
MRPS18B	0.104525456891391	0.00100062605709937
MRPS34	0.132290437702467	0.0000302871203659109
MRRF	0.102744009176062	0.00122081725714678
MSH6	0.103213639559932	0.00115879629893242
MSI2	0.117391662563724	0.000217277846668996
MSL1	0.120971377767508	0.0001380582390857
MT-ATP6	0.256473506539849	0.000000000000000263972561280523
MT-ATP8	0.375065017858319	0.000000000000000000000000000000000233382480086634
MT-CO1	0.279079972238472	0.000000000000000000391748148895967
MT-CO2	0.230432856333231	0.000000000000225382858465214
MT-CO3	0.196876559390627	0.000000000432929233563259
MT-CYB	0.22399641675836	0.00000000000105955411776268
MT-ND1	0.238475431120419	0.0000000000000304858969894451
MT-ND2	0.318152344180138	0.00000000000000000000000112032862656057
MT-ND3	0.365937988880027	0.0000000000000000000000000000000114052734526684
MT-ND4	0.234906131991749	0.0000000000000747592284174796
MT-ND4L	0.398272087921435	6.65871451520291e-39
MT-ND5	0.381874502206762	1.18099307853287e-35
MT-ND6	0.268347636933834	0.00000000000000000932057602726237
MTAP	0.153114822174532	0.00000132997034332667
MTCH1	0.100373576877397	0.0015832455590377
MTDH	0.114537064517105	0.000309157890856791
MTMR4	0.11082752918915	0.000483149289693546
MTRF1L	0.105996647890443	0.000847114203215
MTRNR2L12	0.264404822874886	0.0000000000000000288264967606866
MTRNR2L2	0.12024645672529	0.000151490958395107
MTRNR2L8	0.154655147972266	0.00000103715456768777
MTURN	0.102687123716314	0.00122853411550871
MTX1	0.103635339305126	0.00110559626217983
MYADM	0.130790931317656	0.0000372992306743705
MYCBP2	0.173489571674902	0.000000040658125472504
MYEF2	0.11289210138774	0.000377466950525505
MYH9	0.147959630376011	0.00000300353032084535
MYL12A	0.105399481297672	0.000906587633641325
MYL12B	0.191551546809739	0.00000000128225410689063
MYLIP	0.155396126000905	0.000000919420310796061
MZT2A	0.227478577256161	0.000000000000461310865537576
N4BP2L2	0.104643523900256	0.000987416514608005
NABP1	0.123856720566177	0.0000949165955090618
NAP1L1	0.284150923617928	0.0000000000000000000834026951510433
NARFL	0.111886016866249	0.000425935142272223
NARS	0.11285039649013	0.000379369306441593
NASP	0.121779760694314	0.000124403143476478
NBPF12	0.104569658458843	0.000995661695901187
NCAPH2	0.103925766030662	0.00107027845902014
NCBP2	0.164952354870498	0.000000184759433505217
NCL	0.142799404824804	0.0000066071471532746
NCOA3	0.148402693946394	0.00000280341647857056
NCOA7	0.118134213140066	0.000197974004105944
NCOR1	0.162579457136204	0.000000277641163701157
NCOR2	0.110542892417977	0.00049971292199618
NDFIP1	0.130654261641703	0.0000380097259173419
NDUFA1	0.201169276594953	0.000000000176417974728436
NDUFA13	0.22768445668571	0.000000000000438990649608267
NDUFA3	0.170786585916435	0.0000000662049742758769
NDUFA4	0.188290605030988	0.00000000245576611280811
NDUFA5	0.165524954649439	0.000000167318568958838
NDUFAF2	0.107686307095107	0.000697843970575754
NDUFB1	0.171885203669215	0.0000000543538365332578
NDUFB11	0.117636810969318	0.000210717733191545
NDUFB4	0.174132669123109	0.0000000361641395735882
NDUFB8.1	0.187383173271488	0.00000000293654607146018
NDUFC1	0.102949312433138	0.00119333691064198
NDUFS4	0.10487577084072	0.000961901572673826
NDUFS5	0.151057211639413	0.00000184698737401035
NEAT1	0.310633767531582	0.0000000000000000000000152328152688838
NELFA	0.113020364380867	0.000371671923289537
NENF	0.11164675995053	0.000438285808925629
NFE2L1	0.132857800241661	0.0000279759170937796
NFE2L2	0.128551662933476	0.0000506936759446579
NFKB1	0.100436400745116	0.00157248359608007
NFKBIA	0.133043960135131	0.0000272547794598922
NFKBIL1	0.101331412260111	0.00142629386668522
NHP2L1	0.271652889934376	0.00000000000000000356506930238111
NIP7	0.100067149851109	0.00163671472376956
NIPA1	0.120418929508463	0.000148188000195214
NIPA2	0.112939369056457	0.000375321615742743
NKTR	0.194733534401323	0.000000000672659561335587
NME1-NME2	0.109062120402223	0.000594744564505166
NME6	0.111886267038438	0.000425922399678747
NMT1	0.166971649910031	0.000000130042323721131
NOL7	0.102082950912107	0.00131331556681977
NOM1	0.118489254376078	0.00018932383639309
NONO	0.162960056503775	0.000000260186430669097
NOP10	0.110383819542078	0.000509198474419881
NOP56	0.156226956077201	0.000000802690207769143
NOP58	0.109125424585021	0.000590359961982719
NOTCH2	0.112461305718078	0.000397553770706042
NOTCH2NL	0.14484280069426	0.000004851046869102
NPM1	0.197671355565359	0.00000000036718842005251
NR4A1	0.113024140355187	0.000371502586753505
NR4A2	0.123225214489883	0.000103100321345971
NRDE2	0.117660705639612	0.000210088349590465
NRROS	0.127893401681788	0.0000554261557835813
NSA2	0.191322347754873	0.00000000134267886696644
NSMCE4A	0.102421617741525	0.00126515007252279
NSRP1	0.124798583073469	0.000083840802495624
NTMT1	0.116500386456941	0.000242776923649197
NUCKS1	0.163942723573778	0.000000219874816618918
NUDC	0.137208760940498	0.0000150582783331055
NUP35	0.106906063852546	0.000763449504871394
NUTF2	0.114307089832164	0.00031795808246361
NUTM2A-AS1	0.116524544449653	0.000242050284854478
NXT1	0.144992648499207	0.00000474158546053631
OAZ1	0.154057835893748	0.00000114248053276252
OCIAD2	0.12371515382138	0.0000966960645951231
OFD1	0.140605669955667	0.00000916275428597483
OGFOD3	0.132580084313943	0.0000290854708650578
OPA3	0.105068660572501	0.000941175415865073
ORAI1	0.120171709046135	0.00015294380856872
OSBPL11	0.101299485494442	0.00143128587311724
OST4	0.159181093326525	0.000000492478248512218
OTUD5	0.104568335098295	0.0009958099937998
OTUD6B	0.122670859857856	0.000110827963152558
P2RX5	0.138590325213115	0.0000123206852870886
PABPC1	0.151934198765333	0.00000160659337603832
PABPC4	0.111730510153633	0.000433925062999313
PABPN1	0.145151056503739	0.00000462844095980874
PAICS	0.130424303012988	0.0000392342285581981
PAK2	0.119031373134844	0.000176797244605396
PAN3	0.116718050788449	0.00023630296734698
PARL	0.10412056130234	0.00104717710305743
PARP10	0.117834018547663	0.000205575790681358
PARP14	0.219035578907943	0.00000000000338325618970814
PARP15	0.219949658564005	0.00000000000273736527839116
PARP4	0.124927831871187	0.0000824197129171973
PARP8	0.183214278434421	0.00000000660169096552283
PCBD2	0.100415401738959	0.00157607329859005
PCBP2	0.165654577013375	0.000000163596986720662
PCF11	0.154398955674368	0.00000108113366358079
PCM1	0.127717818637434	0.0000567573730518267
PCMT1	0.100905323657122	0.00149425533064212
PCMTD1	0.109677459502721	0.000553378344342863
PCNXL4	0.110975449528824	0.0004747447650431
PCSK7	0.136893538867206	0.000015759450584976
PDAP1	0.106317590072381	0.000816663858381462
PDCD4	0.239333148631881	0.0000000000000245207192310585
PDCD6	0.103581	0.00111230064809289
PDE4B	0.100012814406902	0.00164636726380307
PDE6D	0.101673393778253	0.00137381844603435
PDE7A	0.147362544279098	0.00000329495045178784
PDIA3	0.140109067413005	0.00000986010128574683
PDS5A	0.124168307992153	0.0000911081711976803
PEBP1	0.183852141672356	0.00000000583912069054714
PEBP4	0.100254965334306	0.0016037489514655
PET100	0.240481109501132	0.0000000000000182973687406428
PEX2	0.102095729103546	0.00131146798790871
PFDN5	0.104232498559444	0.00103411143027601
PFKFB3	0.105913905496098	0.000855133345891615
PGD	0.110942640452306	0.00047659707049031
PGGT1B	0.114075116825475	0.000327071510707943
PGLS	0.101161094113662	0.00145311096071351
PGM1	0.103660751807948	0.00110246350478158
PHF10	0.127356018215486	0.0000595963748601389
PHF20	0.208521302341815	0.0000000000361803431539383
PHIP	0.121743697204498	0.000124984204115238
PHKB	0.142171718437791	0.00000725876522145314
PHLDB3	0.1023677482601	0.00127270090216501
PHLPP2	0.138871610137245	0.0000118247293069903
PHYH	0.122765172583991	0.000109475850293676
PIGT	0.122677078149181	0.000110738332549092
PIK3AP1	0.112535480635239	0.000394025608833608
PIK3C2A	0.123705466372366	0.0000968189768209751
PIK3IP1	0.123225797385062	0.000103092469856751
PIM2	0.120088100300563	0.000154584401558339
PIM3	0.130286013942626	0.0000399885039199147
PIN1	0.110323017423215	0.000512868186712947
PIN4	0.109362010816995	0.000574238006250126
PIP4K2A	0.160016777483124	0.00000042821377033302
PKM	0.12631027343015	0.0000685761296898786
PKN2	0.186336327556194	0.00000000360529090497546
PLA2G16	0.160957309846703	0.000000365544648484332
PLCG2	0.115503646722028	0.000274601980759742
PLEKHF2	0.139554536641294	0.0000106985576871761
PLEKHG1	0.103265106421756	0.00115217918460284
PLEKHJ1	0.127431048935349	0.0000589968039188451
PLIN3	0.118321133020423	0.00019337473532284
PMAIP1	0.113626550207023	0.000345390492961464
PMPCB	0.107835188610239	0.000685935834343936
PNISR	0.20592702762998	0.0000000000637109821864214
PNN	0.101897643616886	0.00134037982847718
PNRC1	0.187577083022564	0.00000000282667573474234
POLE4	0.111488862882779	0.000446618573884679
POLG2	0.108479846201671	0.000636517709046977
POLM	0.103075706163588	0.00117670377155768
POLR1C	0.114250859531302	0.000320145125771501
POLR1E	0.117621200627375	0.000211129862655102
POLR2A	0.121914152349899	0.000122260119314719
POLR2I	0.165299334626765	0.000000173992138146287
POLR2L	0.13949199136648	0.0000107972833719236
POLR3GL	0.100502291242674	0.00156126859743239
PPCS	0.108555922870801	0.000630909193491081
PPDPF	0.23727872641748	0.0000000000000412498354057429
PPHLN1	0.129991049785414	0.000041643498095301
PPIG	0.154464041764911	0.00000106979387700361
PPIH	0.104147003824109	0.001044076961895
PPIL4	0.127162416809347	0.0000611701678422789
PPP1CB	0.14646789507232	0.00000378280339985893
PPP1R10	0.118852497551298	0.000180841802313542
PPP1R14A	-0.119803	0.000160300817235566
PPP1R14B	0.101003378445114	0.00147835675582463
PPP1R15A	0.182779991299353	0.00000000717532922458522
PPP1R2	0.172007734466272	0.0000000531670126768199
PPP1R35	0.11429350276007	0.000318485260193631
PPP2R2A	0.109657229729166	0.000554694638113771
PPP2R5C	0.151825474825882	0.0000016346777059743
PPP3CA	0.134155530326253	0.0000233028283437975
PPP3R1	0.130988607298752	0.0000362938249940085
PQBP1	0.137678798144609	0.0000140676531416359
PRCD	0.110132653694883	0.000524517381036871
PRDM1	0.127055844542013	0.0000620531820875563
PRDM2	0.163628935674204	0.000000232042858149325
PRDM4	0.104259254623946	0.00103101076371209
PRDX1	0.175778003674153	0.0000000267467222304713
PRDX2	0.153970723223117	0.00000115867500574471
PRKAA1	0.103070395495135	0.00117739831687898
PRKAG1	0.109758562177079	0.000548130339736167
PRKAG2	0.11342119199936	0.000354093019366712
PRKAR2A	0.117945327729361	0.0002027257387347
PRKCB	0.12863335020136	0.0000501338109299884
PRKDC	0.14914929680158	0.0000024947802249468
PRKRIR	0.114106725352139	0.000325815514488147
PRKX	0.136211110033453	0.0000173853770764605
PRMT7	0.104677392916094	0.00098365705515683
PRPF19	0.112111283150459	0.000414603965327252
PRPF38B	0.227424603525693	0.000000000000467344110877435
PRPF4B	0.154065473143122	0.00000114107116298518
PRPF6	0.136708981848681	0.0000161842844842782
PRPF8	0.111573987424826	0.000442108095308124
PRR13	0.140831922206187	0.00000886088258301244
PRR4	0.138287874863303	0.0000128760505314297
PRRC2C	0.190351539436569	0.00000000163081429930074
PSAP	0.1716441758279	0.0000000567636725325673
PSMA1	0.115023474905983	0.000291289746056074
PSMA2.1	0.10193436167213	0.00133497665683605
PSMA4	0.101603597991361	0.00138438163678873
PSMB1	0.159776245855592	0.000000445832139258159
PSMB10	0.145934980395971	0.00000410549288309745
PSMB6	0.103187003504957	0.00116223466134796
PSMB7	0.134273414884622	0.0000229172268040084
PSMC2	0.132453404449551	0.0000296053485786285
PSMD11	0.117436502011101	0.000216063823341056
PSMD12	0.115913850550534	0.00026105883123855
PSMD14	0.104135821564783	0.00104538694222037
PSMD2	0.126324653198085	0.0000684444129471434
PSMD5-AS1	0.171832057690311	0.0000000548765385884935
PSMD7	0.108150330370285	0.000661349041854041
PSME1	0.176432236814347	0.0000000237046538212537
PSMG2	0.105547545174694	0.000891491626153121
PTBP1	0.130529397269868	0.0000386700466457428
PTBP2	0.125376272097793	0.0000776633733670504
PTCD3	0.106877187538687	0.000765983862370299
PTCH2	0.19828445454145	0.000000000323228140053683
PTGES3	0.219041787767773	0.0000000000033784020860032
PTK2B	0.132984144343997	0.0000274845444392094
PTMA	0.1448036246727	0.00000488006036012219
PTP4A2	0.114769396971815	0.000300499094105518
PTPN1	0.187892312294666	0.00000000265654101213526
PTPN2	0.177893258596256	0.0000000180727180775175
PTPN6	-0.118337	0.00019298834961478
PTPN7	0.106919642134774	0.000762260482925399
PTPRA	0.101513969843156	0.00139805602399824
PTPRC	0.127705826583023	0.0000568493876966617
PTS	0.102573436803968	0.00124409138346981
PUF60	0.125252242695631	0.0000789522893678474
PUM2	0.105991274886201	0.000847632816873008
PWP1	0.100761520544725	0.00151785615348856
PWWP2B	0.106686880200175	0.000782882417142863
PXDC1	0.122447246579125	0.000114096918056265
QPCT	0.124412709749437	0.0000882222793778014
R3HDM2	0.129927563805528	0.000042008095078707
R3HDM4	0.138615536831037	0.0000122754364523259
RAB14	0.100937552354324	0.00148901250922705
RAB3GAP1	0.112882961655032	0.000377883093220552
RAB5A	0.123232617545375	0.000103000645427019
RAB8A	0.187633147476871	0.00000000279566129308271
RAB8B	0.145052300182348	0.00000469867159380635
RAN	0.129329979453696	0.0000455913961164165
RANBP1	0.12049697400382	0.000146715756690552
RANBP2	0.14462610688643	0.00000501362114553919
RAP1GDS1	0.116304976396331	0.000248730143797264
RAP2C	0.102356901220607	0.00127422633584184
RASSF2	0.105971861847599	0.000849509055392597
RB1	0.205645957386258	0.0000000000677088264181204
RB1CC1	0.118045598066335	0.000200190105337895
RBBP6	0.109311280949581	0.000577660076207487
RBM23	0.146827957045473	0.0000035786782073722
RBM25	0.189690967999009	0.00000000186038711550021
RBM26	0.12791121040514	0.0000552927976073717
RBM3	0.22398891652551	0.00000000000106143779584544
RBM39	0.168157260823573	0.000000105602171852694
RBM4	0.158545034924563	0.000000547516906174668
RBM8A	0.128216268134817	0.0000530550123511551
RBMX	0.166101833980179	0.000000151359598028653
RCC2	0.132218267796393	0.0000305937795315805
RCN2	0.168564738898142	0.0000000982771112063314
RCSD1	0.21595190421522	0.00000000000686606395444963
RDH14	0.110400239712826	0.00050821163465338
RECQL	0.106750812749216	0.000777167290388051
REL	0.239805402012729	0.0000000000000217424333169766
REST	0.13424544762595	0.0000230081555676095
REV3L	0.143871971192597	0.0000056209943965833
REXO4	0.111348301854743	0.000454160436289239
RFX1	0.100357083579833	0.00158608212156784
RFX7	0.120089588730514	0.000154555051143114
RGS10	0.106438996882868	0.000805411764614786
RGS19	0.122339654866416	0.00011570193650219
RGS2	0.105893014822909	0.000857169090973707
RHOF	0.125787822331667	0.0000735273955033802
RHOG	0.122593587838766	0.000111947479708868
RICTOR	0.140004359984918	0.0000100134615418723
RILPL2	0.156772780925449	0.000000733908085118351
RLIM	0.104215717294822	0.00103606054662332
RNASET2	0.164198086304168	0.000000210428986860239
RNF145	0.115660981027265	0.000269331567893278
RNF19A	0.211894567725297	0.0000000000171440221596589
RNF20	0.111354949227299	0.000453801111774212
RNF213	0.121169639920489	0.00013458444071299
RNF6	0.10975592313066	0.000548300376380542
RNH1	0.121523019560231	0.000128595809920333
RNU11	0.161728844450765	0.000000320827366596129
RNU12	0.213492443420659	0.0000000000119827040750776
ROCK1	0.11156734906819	0.000442458308592214
ROMO1	0.115021605002453	0.00029135654796342
RP11-1000B6.3	0.135446185150454	0.000019397306225519
RP11-138A9.2	0.14614314031968	0.00000397643178398034
RP11-175O19.4	0.103030284868719	0.00118265633525791
RP11-277L2.4	0.110746581016709	0.000487807051205853
RP11-2B6.2	0.101168196774677	0.00145198341764281
RP11-349A22.5	0.148528775122529	0.00000274884713197676
RP11-367G6.3	0.10720011732881	0.000738080596399032
RP11-386I14.4	0.199615181399411	0.000000000244735088449931
RP11-400F19.6	0.126497263518153	0.0000668818659374568
RP11-434C1.1	0.106104009353742	0.000836812847893853
RP11-473I1.5	0.13287455563745	0.0000279102763091342
RP11-544A12.8	0.108020979467515	0.000671340065622019
RP11-624C23.1	0.11999353724776	0.000156459869715644
RP11-796E2.4	0.170417638326841	0.0000000707187551047348
RP11-876N24.2	0.121989944083519	0.000121066910666404
RP4-816N1.6	0.100362506450306	0.00158514896637399
RP5-887A10.1	0.233696588877596	0.000000000000100979796220848
RPA3	0.126362262740969	0.0000681010437300986
RPL12	0.147431204970976	0.00000326010989054073
RPL13	-0.121063	0.00013643726276043
RPL13A	0.291939773325051	0.00000000000000000000727861296045106
RPL14	0.106750193610353	0.000777222451189583
RPL17	0.433887173713651	1.28440214459928e-46
RPL18A	-0.235399	0.0000000000000661034858041335
RPL19	-0.116178	0.00025266839323697
RPL21	0.217893171452154	0.00000000000440297420811068
RPL22	0.221316828152855	0.00000000000199051918454316
RPL22L1	0.135864359378326	0.0000182714908402463
RPL23	0.268580040497919	0.00000000000000000871534240952465
RPL23A	0.215673753594607	0.00000000000731486314884374
RPL24	0.169623135607823	0.0000000814717802260504
RPL26	0.176560219780851	0.000000023150096249916
RPL27	0.200087752439042	0.000000000221610934388884
RPL27A	0.273700436260439	0.00000000000000000195256845230591
RPL30	0.18392765644724	0.00000000575471777531007
RPL31	0.37908612675291	4.04194059441086e-35
RPL34	0.271017728505319	0.00000000000000000429262156477562
RPL35	0.119292740229807	0.000171039935413756
RPL35A	0.269607537259954	0.00000000000000000647185527567933
RPL36	0.328423715388297	0.0000000000000000000000000280450507848782
RPL36A	0.49039184383946	6.57098856567333e-61
RPL36AL	0.161750094396471	0.000000319673632957952
RPL37	0.302002788904519	0.000000000000000000000278065655920791
RPL37A	0.34675218543285	0.0000000000000000000000000000271632033772696
RPL38	0.399660365725335	3.46593756990047e-39
RPL39	0.28266925953644	0.000000000000000000131497068068784
RPL41	0.227170552083641	0.000000000000496797267318018
RPL7	0.268334502898036	0.00000000000000000935599007334809
RPL7L1	0.123974229001486	0.0000934630327262502
RPL8	-0.233681	0.00000000000010137038072798
RPLP0	0.108979123212934	0.000600539011581003
RPLP1	0.151753224254347	0.00000165360059299154
RPLP2	0.252765491427243	0.000000000000000724468935032236
RPP21	0.106840373691041	0.000769226174987067
RPS10	0.30238802959218	0.000000000000000000000244761695936954
RPS11	0.131648413671598	0.0000331207564856799
RPS13	0.134826276342445	0.0000211883072250647
RPS16	0.107919432549872	0.000679281495500217
RPS18	0.267313964496919	0.0000000000000000125541268247791
RPS20	0.371645394775244	0.00000000000000000000000000000000101686007415918
RPS21	0.42474292296316	1.50952645246471e-44
RPS25	0.200679951783877	0.000000000195625279080101
RPS27	0.371811494616519	0.00000000000000000000000000000000094708930372796
RPS27L	0.12337090031952	0.000101155392656856
RPS28	0.369922372401692	0.00000000000000000000000000000000212045801282401
RPS29	0.435615510405953	5.13150203411681e-47
RPS4X	0.165063391349838	0.000000181245685762394
RPS4Y1	-0.338708	0.000000000000000000000000000605001356443514
RPS6	0.146649473159054	0.0000036785091413086
RPS6KA5	0.115114861985911	0.000288042366237425
RPS6KB1	0.143175371557234	0.00000624401523642799
RPS8	0.110598475247269	0.000496437471604203
RPSAP58	0.116977541681911	0.000228796359401164
RPTOR	0.105637443524187	0.000882439807812164
RRP15	0.116978463873889	0.000228770085044972
RRP1B	0.119977729604363	0.000156775460928958
RSBN1	0.136942051879273	0.0000156495523204956
RSBN1L	0.194490276919266	0.000000000706939616189663
RSF1	0.185189440181854	0.00000000450790005541083
RSL1D1	0.204764263786067	0.0000000000819053586097537
RSRC2	0.168975242200156	0.0000000913953156570329
RTCA	0.103804665970776	0.00108487641375324
RUFY1	0.112265600110684	0.000407004558193667
SAFB2	0.114116109124836	0.00032544350949116
SAMD9	0.110841168691476	0.000482368561215128
SAMSN1	0.207687453168966	0.000000000043432028506362
SAP18	0.145420581942763	0.00000444184040830786
SARS2	0.102179895046799	0.00129935828013743
SAT1	0.286919506349215	0.0000000000000000000353592218072086
SBDS	0.153529330143928	0.00000124417926434001
SBNO1	0.156474323592799	0.000000770783023669464
SCAF11	0.2133772686906	0.0000000000122972681753718
SCAMP1	0.109906441559132	0.000538680309982648
SCAPER	0.108102464343277	0.000665029998027091
SCOC	0.135849272537912	0.0000183110039320114
SCRN1	0.10250005774731	0.00125422904218913
SDHB	0.146154839614583	0.00000396929456505011
SDHC	0.110709849103563	0.000489934368601979
SDHD	0.105656138282123	0.000880568159821186
SEC11C	0.125970954549522	0.0000717546310236579
SEC14L1	0.138247260142965	0.0000129524197143547
SEC24B	0.102105884066387	0.00131000140581093
SEC61B	0.122675859289841	0.00011075589583563
SEL1L3	0.145437315855332	0.00000443049549237093
SELK	0.126223156836326	0.0000693792401364172
SELM	0.104274191182517	0.00102928355703136
SELO	0.117549977307746	0.000213019842891877
SEMA7A	0.126716515465323	0.0000649456675318125
SENP6	0.118197757226459	0.000196399074000523
SEPN1	0.100265299096341	0.00160195298266004
SEPT6	0.122028851300367	0.000120458651032602
SEPT7	0.112940898258403	0.000375252400363566
SEPT9	0.122401320435697	0.00011477944747361
SEPW1	0.123409056420744	0.000100651746822409
SERBP1	0.164790607994799	0.000000189995800522531
SERF2	0.13367745699513	0.000024930724121436
SERP1	0.107651702995231	0.000700639082625585
SERPINB1	0.1100530623587	0.000529460531669744
SERPINB9	0.127335014029632	0.000059765248793053
SERTAD3	0.105278177871608	0.000919131161895721
SESN3	0.167381903450414	0.000000121024092048429
SET	0.191624685228683	0.00000000126353552372179
SETBP1	0.112610837423518	0.000390471161239532
SETD2	0.102404924168759	0.00126748556602239
SETD4	0.114076793025782	0.000327004791781674
SETD5	0.109374199720224	0.000573418596023038
SETDB1	0.114351511819254	0.000316240198380296
SF1	0.116021707192889	0.000257603140608344
SF3B1	0.16754251072728	0.000000117660787571033
SF3B2	0.105204800184239	0.000926796617059343
SFMBT1	0.13988656758741	0.000010188705315332
SFPQ	0.168053309299505	0.000000107553718520847
SFXN2	0.100180984638603	0.00161666066304406
SH2D3A	0.105876052340834	0.000858825343440376
SH3BGRL	0.17534623832168	0.000000028958044851696
SH3GLB1	0.127947759833603	0.0000550200522964252
SH3KBP1	0.135536507449624	0.000019148691183156
SH3RF1	0.100409437073894	0.00157709430898311
SHFM1	0.159163773778128	0.000000493903719140761
SIAH2	0.117348668991901	0.000218447896117867
SIK1	0.163304407610306	0.000000245309801351689
SIPA1	0.128847867623283	0.0000486912900703055
SIPA1L1	0.102769508787323	0.00121737261134115
SIRT7	0.166919649610957	0.00000013123073522988
SKAP2	0.156811754793941	0.000000729219933763483
SKIL	0.1771539984475	0.000000020737505365038
SKP1	0.167705242113639	0.000000114345180786769
SLAIN2	0.147364045691121	0.00000329418479003873
SLC20A2	0.109917390572181	0.00053798668954341
SLC25A3	0.152309547967129	0.00000151315334210023
SLC25A36	0.133409509189543	0.0000258897699474793
SLC25A38	0.104486976646889	0.00100496646456862
SLC25A5	0.112302712036644	0.00040519644548688
SLC25A6	0.118393284374704	0.000191626380150255
SLC35E2B	0.124596729957801	0.0000861065119978463
SLC38A2	0.168530326989177	0.0000000988762285115954
SLC44A2	0.13372831879467	0.0000247525306705865
SLC4A7	0.105249948056899	0.00092207324133314
SLIRP	0.134378297688619	0.0000225792579101273
SLMO2	0.10016893439127	0.00161877279498993
SMAD4	0.125703120216928	0.0000743612482890974
SMAP2	0.225991046267293	0.000000000000659163626089003
SMARCA2	0.107898829617832	0.000680903341271124
SMARCA5	0.132664099200044	0.000028745476161772
SMARCAD1	0.124936551930376	0.0000823246590827102
SMARCB1	0.165189160664486	0.000000177343615182892
SMARCC1	0.101266362467541	0.00143648191729824
SMCHD1	0.126304134439697	0.0000686324349264738
SMDT1	0.113941112446483	0.000332446724918121
SMEK2	0.105916952328471	0.000854836813874176
SMG1	0.118745370961168	0.00018330546242481
SMIM14	0.143425053886801	0.00000601347934758354
SMIM19	0.101313020647949	0.00142916758261984
SMIM20	0.110217510307436	0.000519294543655481
SMIM4	0.111768502950842	0.000431960200606615
SMIM7	0.12786513055466	0.0000556384852508261
SNAPC4	0.100220967745503	0.00160967067133187
SNF8	0.123515139583138	0.0000992638812948311
SNHG12	0.130278976957358	0.0000400272510722695
SNHG15	0.123208199823766	0.000103329754169768
SNHG7	0.142587189915474	0.00000682093477549649
SNHG8	0.169577207456102	0.0000000821394905880595
SNIP1	0.141341069682334	0.0000082158887266024
SNORA76	0.129315358360975	0.0000456825945991981
SNORD3A	0.258662022394475	0.000000000000000144358267581492
SNORD3D	0.103947950991623	0.00106762392629262
SNRNP200	0.142776474347897	0.00000662993539608857
SNRNP27	0.153090594448722	0.00000133515666568886
SNRNP70	0.183704238385246	0.00000000600792991124053
SNRPA1	0.112293274352009	0.000405655542762063
SNRPB	0.179261138104038	0.0000000139905537222656
SNRPB2	0.123691514026565	0.0000969962599773364
SNRPC	0.107173283477982	0.000740362803968037
SNRPD2	0.183548672631958	0.00000000619059753852539
SNRPE	0.132742100601393	0.0000284331968811142
SNRPF	0.108249893855401	0.000653753003382486
SNRPG	0.119899783507193	0.000158340379692575
SNW1	0.136617818451564	0.0000163981347163677
SNX9	0.173469062101794	0.0000000408099963817104
SOCS1	0.116297034121337	0.000248974974748818
SOD1	0.211519279740052	0.0000000000186410151802916
SOD2	0.146536158252361	0.00000374326686728922
SON	0.328066756996652	0.0000000000000000000000000319560140012885
SP1	0.138436344157776	0.0000126005129505735
SP100	0.137661532393861	0.0000141029167118135
SP140	0.106394185249761	0.000809548116184946
SPATA13	0.128949832295469	0.0000480194885515403
SPCS1	0.10560871595949	0.000885323080296206
SPCS2	0.102001001105427	0.00132522168745624
SPG11	0.121072272496045	0.000136280033840896
SPG20	0.15541695025877	0.000000916304681369601
SPIDR	0.108088814961733	0.00066608313211874
SPTAN1	0.118215224731348	0.000195968208852256
SQSTM1	0.259997319364391	0.0000000000000000996079742742443
SREK1	0.129966468193075	0.0000417843119214528
SREK1IP1	0.117382455738417	0.000217527910543693
SRF	0.10026311637539	0.00160233217725447
SRGN	0.254039165073895	0.000000000000000513109951878727
SRP54	0.147618246535611	0.00000316697964774395
SRP9	0.137478886599515	0.0000144811443664509
SRRM1	0.148617847775572	0.00000271091056685217
SRRM2	0.197041788563719	0.000000000418380662305435
SRSF10	0.202959837819556	0.000000000120597614691636
SRSF2	0.169034617128324	0.0000000904393330410188
SRSF3	0.224881575348281	0.000000000000858795953215048
SRSF4	0.125382464649454	0.0000775995437711117
SRSF5	0.123847301532244	0.0000950340257022164
SRSF7	0.163398255186553	0.000000241399850843166
SRSF9	0.12462325399581	0.0000858055293039192
SSBP1	0.137983277227152	0.0000134594127988278
SSPN	0.131589566946607	0.0000333927005517691
SSR2	0.102806249527106	0.00121242520408361
SSR4	0.101615792143003	0.00138253074703103
SSSCA1	0.114412376731704	0.000313900518128012
ST6GAL1	0.198050387601113	0.0000000003393695282058
ST8SIA4	0.154733964866775	0.0000010239739382999
STAP1	0.118747710431839	0.000183251325223118
STARD7	0.116815802563963	0.000233448495629793
STAT3	0.253328484081067	0.000000000000000622162038630163
STK11	0.108196916356586	0.000657784694340437
STK17A	0.174086294550035	0.0000000364714226347397
STK17B	0.243475051032831	0.00000000000000846572619858373
STK4	0.204949439053004	0.0000000000787011678278122
STRAP	0.12972741604907	0.0000431774300808278
STRN3	0.104610772964221	0.000991064496005916
STX12	0.101407802672337	0.0014144145897605
SUMF2	0.102395660985447	0.00126878323400038
SUMO2	0.161824690148177	0.000000315655148190111
SUPT5H	0.161898126815732	0.000000311746695306886
SVIP	0.181569097619471	0.00000000904228201449821
SWAP70	0.169607402530805	0.0000000816999169282278
SYAP1	0.14003148471393	0.00000997351629079772
SYNCRIP	0.150663760654806	0.00000196572049275127
SYNGR1	0.184342827191792	0.0000000053114298824182
SYNGR2	0.180863919782873	0.0000000103384678389002
SYNGR3	0.107416502885765	0.000719914122523932
SYNPO	-0.11	0.000532788586328257
SYPL1	0.166468561485268	0.000000141989632946203
SYT1	0.120549976471904	0.000145723762611446
TAF1	0.141537022426575	0.00000797980215033374
TAF1D	0.260871927626502	0.0000000000000000780263829497264
TAF5	-0.107827	0.00068654810523549
TAF7	0.17467438284977	0.0000000327553088310997
TAF9	0.103891943501752	0.00107433721422247
TAGLN2	0.118936772933555	0.000178925548417295
TAOK3	0.117650690566272	0.000210351930885785
TAPBP	0.183425571133261	0.0000000063389572918233
TARSL2	0.146804921772133	0.0000035914151490007
TBC1D32	0.107131804959951	0.000743903413511811
TBCA	0.108672395993165	0.000622411448556592
TBK1	0.105972745130151	0.000849423604131952
TBL1XR1	0.117643653697315	0.00021053731588524
TBXAS1	0.128078127579793	0.0000540575294532663
TCEA1	0.23388159962591	0.0000000000000964517025827214
TCEB1	0.131839839498155	0.0000322505916573221
TCEB2	0.164323671529713	0.000000205928447163005
TCEB3	0.121186838935463	0.000134287000699714
TCERG1	0.123748305096532	0.0000962765606303055
TCF25	0.135020694112486	0.0000206103445529147
TCF3	0.109018428261478	0.000597788421671375
TCL1A	-0.179256	0.0000000140031981856825
TCOF1	0.105540177361441	0.000892237284752282
TCP1	0.145187484649128	0.00000460278943535627
TDP2	0.135187692507692	0.0000201258899879859
TERF2	0.120077755364752	0.000154788538569066
TERF2IP	0.106586362849893	0.000791946787374614
TET2	0.11274120257957	0.000384392619892256
TEX9	0.157328325232693	0.000000669739476011404
TFE3	0.119536017938155	0.000165839730419204
TFG	0.114278265290756	0.000319077445028065
TGFB1	0.200475602517633	0.000000000204237180139235
TGIF1	0.110582282828371	0.000497389608287998
TGOLN2	0.12832247117427	0.0000522962604325172
THEMIS2	0.230087864712462	0.000000000000245171331423283
THOC7	0.105531285867231	0.000893137915913594
THUMPD1	0.105793591190487	0.000866919322884399
TIMM17B	0.132553773788283	0.0000291927277502973
TLE3	0.132913971656956	0.0000277564365168315
TLE4	0.13554548535844	0.000019124145454931
TLK1	0.1371530423691	0.0000151800169539986
TMA16	0.110617860713309	0.000495299811192881
TMA7	0.312435196334214	0.00000000000000000000000820674796373741
TMCO1	0.140389426665367	0.00000946042294560856
TMED2	0.102898737591696	0.00120005299615074
TMED4	0.107217056111061	0.00073664332108444
TMED9	0.123445681523738	0.000100170533467735
TMEM107	0.25663523292789	0.000000000000000252507186090604
TMEM109	0.100673977127922	0.00153239108264172
TMEM120B	0.111095414669336	0.000468028809573715
TMEM156	0.120131799760115	0.000153724867075713
TMEM161B	0.112576972225618	0.000392064805809087
TMEM165	0.109038617136873	0.000596380148388333
TMEM219	0.116640929682831	0.000238578039579467
TMEM243	0.111520623099891	0.000444930709230432
TMEM256	0.123504478911054	0.0000994025332149435
TMEM258	0.122159597631183	0.000118435627584997
TMEM66	0.122470831713593	0.000113747895820154
TMOD2	0.100291144482359	0.00159746924243544
TMOD3	0.114478808446577	0.000311365320547312
TMPO	0.132508280905248	0.0000293790692225891
TMSB10	-0.201755	0.000000000155821572669933
TMSB4X	-0.10785	0.000684736394318271
TMX1	0.110057976316507	0.000529154091171362
TNF	0.134679376546323	0.0000216351922854563
TNFRSF13B	0.209292594420795	0.0000000000305344747348454
TNFRSF13C	0.380187078742262	2.49018591972494e-35
TNFRSF14	0.152865302850418	0.00000138432297112391
TNIP2	0.151118795866694	0.00000182903717973433
TNRC6A	0.112539322053731	0.000393843688104948
TNRC6B	0.112250703533591	0.000407732441615449
TOMM20	0.123763564572955	0.000096084040865893
TOMM5	0.179720487059394	0.0000000128322687730162
TOMM7	0.219005059366816	0.00000000000340721589855535
TOP1	0.172059407406342	0.0000000526740652881557
TOP1MT	0.119447582442643	0.000167712667236255
TOP2B	0.108759005909473	0.000616161553212544
TOPORS	0.148304503021342	0.00000284663197752516
TOPORS-AS1	0.113333560988409	0.000357868556975548
TOR3A	0.128153923744287	0.0000535052619664417
TP53	0.14998159817024	0.0000021891316393621
TP53BP1	0.104719591732507	0.000978991504183549
TP53I11	0.11095433284628	0.000475936181194588
TP53INP1	0.228991700188545	0.000000000000320042394120813
TPGS1	0.101087715019015	0.00146480710228001
TPI1	0.15980359325546	0.000000443794366534242
TPM4	0.117931209616179	0.000203085167111348
TPR	0.176480254565262	0.0000000234950975589071
TPT1	0.106222037513247	0.000825621979750076
TRA2A	0.136802404381613	0.000015967889920249
TRA2B	0.190534403998344	0.00000000157229579079861
TRAF3	0.144282075122779	0.00000528247961335429
TRAM1	0.107390013450305	0.000722115525646516
TRIM22	0.170419768048344	0.000000070691865015233
TRIM27	0.128640180657799	0.0000500872626849906
TRIM33	0.12702587986482	0.0000623036190394946
TRIM44	0.164249865364289	0.000000208562023053671
TRIM73	0.12751880231082	0.000058302802737195
TRIP11	0.109991788112288	0.000533295561726954
TRIP12	0.112006435722039	0.000419842492763662
TRMT112	0.132448895875605	0.0000296240127218688
TRMT6	0.141030479436071	0.00000860380165089676
TSC22D3	0.400902573873512	1.92726989468631e-39
TSEN15	0.105060442309274	0.000942049982504917
TSNAX	0.141896171550674	0.00000756380511126594
TSPAN3	0.197035139350906	0.000000000418956817758075
TSPYL2	0.177681388250444	0.0000000188004607509115
TTC17	0.126851396790525	0.0000637809868867294
TTC3	0.141133262841863	0.00000847353480193104
TTC4	0.114369867992316	0.000315532866030966
TTL	0.113604909878367	0.000346298045440614
TUBA4A	0.153648082981996	0.00000122059723096043
TUBGCP2	0.130777998828783	0.0000373659188094951
TUG1	0.127657170957355	0.0000572241701606661
TULP4	0.101121302499375	0.00145944277103781
TWISTNB	0.126365630578578	0.0000680703754235741
TXN	0.143669045608804	0.00000579607002851534
TXN2	0.104591727901185	0.000993191566117581
TXNIP	0.303541620994783	0.000000000000000000000166855050561163
U2AF1	0.114470134664548	0.000311695243531986
UBA52	0.226243071755001	0.00000000000062059615075252
UBA6	0.131805022757748	0.0000324072273715675
UBALD2	0.105390453293796	0.000907515701194235
UBB	0.132337718317448	0.000030087802802599
UBC	0.285925954909336	0.0000000000000000000481641551784027
UBE2D2	0.101130318700991	0.00145800585424893
UBE2D3	0.171166015612221	0.0000000618540607138869
UBE2I	0.162017107625999	0.00000030551312434603
UBE2J1	-0.145175	0.00000461141852300986
UBE2J2	0.121224711754225	0.000133634206390771
UBE2V1	0.162409238452194	0.000000285808092716612
UBE3C	0.101656898272684	0.0013763082261697
UBE4B	0.100130499540799	0.00162552649747534
UBL4A	0.117124813931698	0.000224636040251126
UBL5	0.163260179918221	0.000000247173559654553
UBQLN4	0.103968509712936	0.00106516941088672
UBR2	0.119394404807306	0.000168848439569697
UBR4	0.13098659732901	0.00003630391742284
UCP2	0.18585104790112	0.00000000396344301780201
UFC1	0.147906702223303	0.00000302833116408675
UFL1	0.102826057809806	0.00120976557542733
UFSP2	0.103833702901972	0.00108135950628111
UHRF1BP1	0.100011966994527	0.00164651821760434
UIMC1	0.144127096986536	0.0000054080472960017
ULK1	0.109281572562195	0.00057967289881806
UNK	0.109333263069109	0.00057617491360646
UPF2	0.244188904036293	0.00000000000000703374035361055
UPF3B	0.117626214220598	0.000210997416192862
UQCR10	0.146660843905549	0.00000367207046502761
UQCR11.1	0.173391823713498	0.0000000413868815132762
UQCRB	0.261005820572119	0.0000000000000000751572423067766
UQCRH	0.157207495535367	0.000000683219231415622
UQCRQ	0.141637773330453	0.00000786095077712863
USF1	0.114963064025097	0.000293455172833088
USMG5	0.250580630026831	0.00000000000000130335626950667
USP10	0.113962242699742	0.000331593697707234
USP12	0.116999212178318	0.000228179687888549
USP3	0.136931175446222	0.0000156741274699385
USP34	0.127712603429302	0.0000567973718532292
USP47	0.123014428777466	0.000105976810364084
USP48	0.120943249034108	0.00013855786662935
UTY	-0.144552	0.00000507037768832435
UVRAG	0.100794794945203	0.00151236490535036
UVSSA	0.102730461888883	0.00122265096296056
UXT	0.174691959303001	0.0000000326500903265997
VAPA	0.14158658538708	0.00000792112216945285
VASP	0.110954076760022	0.000475950646813542
VCP	0.192898402480822	0.000000000977149974352685
VDAC1	0.138866140190069	0.0000118341897794182
VDAC2	0.10254890367504	0.00124747231198098
VHL	0.118082343895086	0.000199268349957134
VIM	0.116220732802774	0.00025133858863312
VIMP	0.12282125995404	0.000108679138981306
VKORC1	0.103721926983641	0.0010949556439707
VMA21	0.100220079373755	0.00160982567750813
VMP1	0.10771376043892	0.000695633818372581
VOPP1	0.139565811935181	0.0000106808518084969
VPS13C	0.112225988757029	0.000408942745108862
VPS25	0.155716058302134	0.000000872658146775123
VPS26A	0.116610590594952	0.000239478653746
VPS28	0.154846183071475	0.00000100548502223114
VPS4B	0.123072936151478	0.000105170897484707
VPS9D1	0.117809342052552	0.00020621269652426
VTI1A	0.113817085359679	0.000337495169648384
VTI1B	0.102336890935905	0.00127704483189726
WBP11	0.161935565312622	0.000000309772137149725
WDR11	0.105637722404572	0.000882411860334167
WDR33	0.115654522694692	0.000269546033798074
WDR43	0.147802796574586	0.00000307759053224984
WDR70	0.128287508271529	0.0000525449067634715
WDR74	0.301636053141434	0.000000000000000000000313915343303687
WDR82	0.10541582078646	0.000904910187361853
WDR83OS	0.115297218488365	0.000281663404842879
WEE1	0.139612642265579	0.0000106076114945229
WSB1	0.159175330382885	0.000000492952122301363
WTAP	0.139078536578485	0.0000114720896805945
XIST	0.297729715219436	0.00000000000000000000113008919087027
XPC	0.144469450689912	0.00000513438306192297
XPNPEP3	0.143270071421353	0.00000615560049643752
XPO1	0.113922746515093	0.0003331898216476
XPO4	0.146140816923778	0.00000397785064529781
XRCC5	0.14477104101197	0.00000490431792646921
YAF2	0.144520812408797	0.00000509448655196884
YBX1	0.126641773468431	0.0000655996789982718
YIF1B	0.10238097779133	0.00127084269400888
YIPF4	0.149809216348688	0.00000224932891889073
YME1L1	0.139601769238862	0.0000106245735652241
YPEL5	0.112555538237283	0.000393076590282846
YTHDC1	0.132938959776583	0.0000276593257708425
YTHDC2	0.104289804253524	0.00102748097949349
YWHAE	0.13536247598181	0.0000196304565099084
YWHAG	0.102206231520881	0.00129559023485008
YWHAH	0.180631234863632	0.0000000108044497589987
YWHAZ	0.18130510156191	0.0000000095079078343575
ZBED6	0.110037028555961	0.000530461568231435
ZBTB32	0.112269922441061	0.000406793585446743
ZBTB33	0.104683161316218	0.000983018083362453
ZBTB38	0.101733901228374	0.00136472110982748
ZBTB4	0.102801007862706	0.00121312989633367
ZBTB41	0.122123183225545	0.000118995826149717
ZBTB43	0.10836050067865	0.000645409462224044
ZBTB7A	0.182078777307233	0.00000000820513675633809
ZC3H11A	0.1173354452441	0.00021880896016391
ZC3H13	0.100466580195557	0.00156733769319224
ZC3H15	0.1564731333391	0.000000770933589059305
ZC3H7A	0.163314826476008	0.000000244872726399633
ZC3H8	0.131816989758431	0.0000323533082709566
ZC3HAV1	0.125571208802216	0.0000756776582761976
ZCCHC10	0.174812831744648	0.0000000319353230601451
ZCCHC11	0.18907063960331	0.00000000210441783307531
ZDHHC2	0.112854274846083	0.000379192019808424
ZDHHC21	0.118049863627171	0.000200082900503246
ZFAND6	0.11879051190691	0.000182263510458151
ZFAS1	0.241607855114082	0.0000000000000137071955322025
ZFAT	0.117822570672687	0.000205871033125796
ZFP36	0.147124863590141	0.00000341833122240874
ZFP36L1	0.168993058481697	0.0000000911074385647294
ZFP36L2	0.244309262278636	0.00000000000000681698041624167
ZFYVE16	0.102623981741495	0.00123715236665146
ZMAT1	0.14323391150369	0.00000618921841548425
ZMAT5	0.10125400410015	0.00143842503063701
ZNF100	0.100376857274344	0.00158268194366019
ZNF138	0.109598294026218	0.00055854603426437
ZNF141	0.120111594061323	0.000154121737690812
ZNF146	0.113717397014658	0.000341604742261777
ZNF148	0.133323855727357	0.0000262036620884743
ZNF165	0.100778950953714	0.00151497734390054
ZNF217	0.116946672198598	0.000229677501441673
ZNF24	0.134633190779068	0.0000217775355707899
ZNF248	0.113915477577101	0.000333484355708554
ZNF292	0.125595572926667	0.0000754328715270663
ZNF33B	0.101007	0.00147770408158553
ZNF394	0.130165636777318	0.0000406562484395751
ZNF395	0.124185821138551	0.0000908984503148716
ZNF407	0.138881437589332	0.0000118077504755013
ZNF43	0.114246033475501	0.000320333485931368
ZNF441	0.113965706790219	0.000331454047825724
ZNF451	0.104761526768667	0.000974375393032801
ZNF460	0.101912126176723	0.0013382462751405
ZNF567	0.101945196512871	0.00133338611579099
ZNF626	0.122927323930161	0.000107187427573128
ZNF638	0.127757579940105	0.0000564532925839223
ZNF644	0.206839846824173	0.0000000000522534721880862
ZNF680	0.102926116050076	0.00119641295799104
ZNF721	0.101239001458885	0.0014407871555373
ZNF75D	0.106833930217221	0.000769794978789498
ZNF780A	0.101760306314469	0.00136076850308216
ZNHIT6	0.137426826840353	0.0000145907076210895
ZNRD1	0.108402360564165	0.000642277669680821
ZRANB2	0.236707753275234	0.0000000000000476240632204538
ZRANB3	0.104862325326951	0.000963361925180756
ZSCAN16-AS1	0.143355910776892	0.00000607649281885703
