# Supplementary material
Source: Research Square preprint supplement (doi:10.21203/rs.3.rs-9444283/v1)
Supplement: Supplementary file 2 [file c92af4069be934996a5b9639.xlsx]

## Sheet: GO_venn_enrich
Table S1 The list of Gene Ontology (GO) items enriched by DEGs between the high and low expression groups
ONTOLOGY	ID	Description	GeneRatio	BgRatio	pvalue	p.adjust	qvalue	geneID	Count
BP	GO:0002181	cytoplasmic translation	14/220	161/18903	6.17279449594601e-09	6.17279449594601e-09	1.67315219232221e-05	RPS29/RPL38/RPS28/RPL17/RPL36A/RPS20/RPS21/RPL18A/RPL8/RPL36/RPL31/ZC3H15/EIF5/NCBP2	14
BP	GO:0034976	response to endoplasmic reticulum stress	14/220	261/18903	2.4119221787986e-06	2.4119221787986e-06	0.00326878926863495	BCL2/ATF4/MARCKS/HERPUD1/DDX3X/PPP1R15A/VCP/CREBZF/PTPN2/SVIP/EP300/DNAJB14/PDIA3/SEC16A	14
BP	GO:0048872	homeostasis of number of cells	14/220	296/18903	1.02494913857151e-05	1.02494913857151e-05	0.0092605053748128	MIF/BCL2/GPR183/STAT3/TSC22D3/TNFRSF13B/KRAS/HIPK2/HMGB2/PTPN2/SKIL/RB1/ZC3H8/ZFP36	14
BP	GO:0071482	cellular response to light stimulus	9/220	123/18903	1.38902816434822e-05	1.38902816434822e-05	0.00941249348209647	ATF4/CRIP1/NMT1/ERCC1/TP53INP1/XPC/EP300/CREBBP/AKT2	9
BP	GO:0019083	viral transcription	6/220	51/18903	2.70022107312668e-05	2.70022107312668e-05	0.0130467564253389	SMARCB1/REST/MDFIC/RSF1/EP300/ZFP36	6
BP	GO:0030968	endoplasmic reticulum unfolded protein response	7/220	77/18903	3.1683784534766e-05	3.1683784534766e-05	0.0130467564253389	ATF4/HERPUD1/PPP1R15A/VCP/CREBZF/PTPN2/EP300	7
BP	GO:0071214	cellular response to abiotic stimulus	14/220	335/18903	4.03955865718888e-05	4.03955865718888e-05	0.0130467564253389	ATF4/CRIP1/DDX3X/NMT1/ERCC1/TP53INP1/XPC/REST/EP300/CREBBP/SLC38A2/AKT2/AKR1B1/CCND2	14
BP	GO:0104004	cellular response to environmental stimulus	14/220	335/18903	4.03955865718888e-05	4.03955865718888e-05	0.0130467564253389	ATF4/CRIP1/DDX3X/NMT1/ERCC1/TP53INP1/XPC/REST/EP300/CREBBP/SLC38A2/AKT2/AKR1B1/CCND2	14
BP	GO:0097193	intrinsic apoptotic signaling pathway	13/220	298/18903	4.92886239834692e-05	4.92886239834692e-05	0.0130467564253389	MIF/BCL2/ATF4/CRIP1/HERPUD1/DDX3X/HIPK2/DDIT4/PPP1R15A/PTPN2/SKIL/EP300/NONO	13
BP	GO:0042113	B cell activation	14/220	350/18903	6.47715720560992e-05	6.47715720560992e-05	0.0130467564253389	MIF/TNFRSF13C/BCL2/GPR183/THEMIS2/TNFRSF13B/CD27/ERCC1/SAMSN1/TNIP2/PTPN2/EP300/KLF6/NDFIP1	14
BP	GO:0019319	hexose biosynthetic process	7/220	86/18903	6.48037997867541e-05	6.48037997867541e-05	0.0130467564253389	ATF4/SIRT7/PTPN2/EP300/MDH2/AKR1B1/SIK1	7
BP	GO:0071243	cellular response to arsenic-containing substance	4/220	20/18903	7.47189366683796e-05	7.47189366683796e-05	0.0130467564253389	ATF4/DDX3X/VCP/SLC38A2	4
BP	GO:0043368	positive T cell selection	5/220	38/18903	7.48957963623916e-05	7.48957963623916e-05	0.0130467564253389	BCL2/STAT3/PTPN2/LY9/DOCK2	5
BP	GO:0071478	cellular response to radiation	10/220	189/18903	7.64144377096168e-05	7.64144377096168e-05	0.0130467564253389	ATF4/CRIP1/NMT1/ERCC1/TP53INP1/XPC/EP300/CREBBP/AKT2/CCND2	10
BP	GO:0034644	cellular response to UV	7/220	89/18903	8.06896354384636e-05	8.06896354384636e-05	0.0130467564253389	ATF4/CRIP1/ERCC1/TP53INP1/XPC/EP300/CREBBP	7
BP	GO:0035967	cellular response to topologically incorrect protein	8/220	120/18903	8.14910675761205e-05	8.14910675761205e-05	0.0130467564253389	ATF4/HERPUD1/PPP1R15A/VCP/CREBZF/PTPN2/EP300/DNAJB14	8
BP	GO:0010675	regulation of cellular carbohydrate metabolic process	9/220	155/18903	8.60529499259098e-05	8.60529499259098e-05	0.0130467564253389	STAT3/SIRT7/MIDN/DDIT4/PTPN2/EP300/AKT2/ADIPOR1/SIK1	9
BP	GO:0046364	monosaccharide biosynthetic process	7/220	90/18903	8.6640596067299e-05	8.6640596067299e-05	0.0130467564253389	ATF4/SIRT7/PTPN2/EP300/MDH2/AKR1B1/SIK1	7
BP	GO:0009416	response to light stimulus	13/220	321/18903	0.00010452095797066	0.00010452095797066	0.0149108845858421	BCL2/ATF4/CRIP1/KRAS/NMT1/ERCC1/TP53INP1/XPC/EP300/CREBBP/AKT2/SIK1/JUND	13
BP	GO:0035966	response to topologically incorrect protein	9/220	163/18903	0.000126435917368757	0.000126435917368757	0.01713539406445	ATF4/CREBRF/HERPUD1/PPP1R15A/VCP/CREBZF/PTPN2/EP300/DNAJB14	9
BP	GO:0050864	regulation of B cell activation	10/220	204/18903	0.000143610805510356	0.000143610805510356	0.0180447751533026	MIF/TNFRSF13C/BCL2/GPR183/THEMIS2/TNFRSF13B/CD27/SAMSN1/TNIP2/NDFIP1	10
BP	GO:0002260	lymphocyte homeostasis	6/220	69/18903	0.000151035586902315	0.000151035586902315	0.0180447751533026	MIF/BCL2/TSC22D3/TNFRSF13B/SKIL/ZC3H8	6
BP	GO:0042771	intrinsic apoptotic signaling pathway in response to DNA damage by p53 class mediator	5/220	44/18903	0.000153117800815403	0.000153117800815403	0.0180447751533026	MIF/BCL2/HIPK2/DDIT4/EP300	5
BP	GO:0001776	leukocyte homeostasis	7/220	100/18903	0.000168295228547585	0.000168295228547585	0.0182467458320014	MIF/BCL2/GPR183/TSC22D3/TNFRSF13B/SKIL/ZC3H8	7
BP	GO:0034620	cellular response to unfolded protein	7/220	100/18903	0.000168295228547585	0.000168295228547585	0.0182467458320014	ATF4/HERPUD1/PPP1R15A/VCP/CREBZF/PTPN2/EP300	7
BP	GO:0010677	negative regulation of cellular carbohydrate metabolic process	5/220	46/18903	0.000189651705947446	0.000189651705947446	0.0191127961455934	STAT3/MIDN/DDIT4/EP300/SIK1	5
BP	GO:0008630	intrinsic apoptotic signaling pathway in response to DNA damage	7/220	102/18903	0.000190385716945425	0.000190385716945425	0.0191127961455934	MIF/BCL2/CRIP1/HIPK2/DDIT4/SKIL/EP300	7
BP	GO:0071103	DNA conformation change	7/220	106/18903	0.000241595155568264	0.000241595155568264	0.0228730888246709	CHD6/DDX3X/CHD2/HMGB2/TOP1/SMARCAD1/HELQ	7
BP	GO:0006986	response to unfolded protein	8/220	141/18903	0.000249314289027807	0.000249314289027807	0.0228730888246709	ATF4/CREBRF/HERPUD1/PPP1R15A/VCP/CREBZF/PTPN2/EP300	8
BP	GO:0010906	regulation of glucose metabolic process	7/220	107/18903	0.000255989201721078	0.000255989201721078	0.0228730888246709	SIRT7/MIDN/PTPN2/EP300/AKT2/ADIPOR1/SIK1	7
BP	GO:0051384	response to glucocorticoid	8/220	142/18903	0.000261597074130703	0.000261597074130703	0.0228730888246709	BCL2/CFLAR/DDIT4/EIF4E/REST/FOSB/ZFP36/ALPL	8
BP	GO:0009314	response to radiation	15/220	452/18903	0.00027931387017542	0.00027931387017542	0.0232291435224134	BCL2/ATF4/CRIP1/KRAS/NMT1/ERCC1/TP53INP1/XPC/EP300/CREBBP/AKT2/SIK1/TXN/CCND2/JUND	15
BP	GO:0036293	response to decreased oxygen levels	12/220	309/18903	0.000282809184243752	0.000282809184243752	0.0232291435224134	BCL2/CFLAR/MALAT1/ATF4/HIPK2/DDIT4/REST/SDHD/EP300/CREBBP/VHL/JUND	12
BP	GO:0045058	T cell selection	5/220	51/18903	0.000310042462168671	0.000310042462168671	0.0236706412034989	BCL2/STAT3/PTPN2/LY9/DOCK2	5
BP	GO:0061635	regulation of protein complex stability	3/220	12/18903	0.000316586516290967	0.000316586516290967	0.0236706412034989	SQSTM1/SNF8/SCOC	3
BP	GO:0002831	regulation of response to biotic stimulus	13/220	361/18903	0.000329301876396985	0.000329301876396985	0.0236706412034989	MIF/HMGB2/PTPN2/SERPINB9/EP300/SEC14L1/CREBBP/PQBP1/GRN/TRAF3/MAP3K7/NONO/LAMP1	13
BP	GO:0006109	regulation of carbohydrate metabolic process	9/220	186/18903	0.000339110065563511	0.000339110065563511	0.0236706412034989	STAT3/SIRT7/MIDN/DDIT4/PTPN2/EP300/AKT2/ADIPOR1/SIK1	9
BP	GO:0045912	negative regulation of carbohydrate metabolic process	5/220	52/18903	0.000339809726356675	0.000339809726356675	0.0236706412034989	STAT3/MIDN/DDIT4/EP300/SIK1	5
BP	GO:0009411	response to UV	8/220	149/18903	0.000362169958330298	0.000362169958330298	0.0236706412034989	BCL2/ATF4/CRIP1/ERCC1/TP53INP1/XPC/EP300/CREBBP	8
BP	GO:0019318	hexose metabolic process	10/220	229/18903	0.000363876668455614	0.000363876668455614	0.0236706412034989	ATF4/SIRT7/MIDN/PTPN2/EP300/MDH2/AKT2/AKR1B1/ADIPOR1/SIK1	10
BP	GO:0002833	positive regulation of response to biotic stimulus	9/220	188/18903	0.000366780032628973	0.000366780032628973	0.0236706412034989	MIF/HMGB2/EP300/CREBBP/PQBP1/GRN/MAP3K7/NONO/LAMP1	9
BP	GO:0006006	glucose metabolic process	9/220	188/18903	0.000366780032628973	0.000366780032628973	0.0236706412034989	ATF4/SIRT7/MIDN/PTPN2/EP300/MDH2/AKT2/ADIPOR1/SIK1	9
BP	GO:0006094	gluconeogenesis	6/220	83/18903	0.000415534929212521	0.000415534929212521	0.025694183706878	ATF4/SIRT7/PTPN2/EP300/MDH2/SIK1	6
BP	GO:2001234	negative regulation of apoptotic signaling pathway	10/220	233/18903	0.000417093933571844	0.000417093933571844	0.025694183706878	MIF/BCL2/CFLAR/HERPUD1/DDX3X/HMGB2/RB1/CSNK2A1/PHIP/NONO	10
BP	GO:0071385	cellular response to glucocorticoid stimulus	5/220	55/18903	0.000442175452459586	0.000442175452459586	0.0264645404606169	CFLAR/DDIT4/EIF4E/REST/ZFP36	5
BP	GO:0006338	chromatin remodeling	13/220	373/18903	0.000449126375972412	0.000449126375972412	0.0264645404606169	BRD9/SMARCB1/CHD6/BRD2/CHD2/HMGB2/RSF1/RB1/EP300/TOP1/ARID2/SMARCAD1/TSPYL2	13
BP	GO:2001233	regulation of apoptotic signaling pathway	13/220	374/18903	0.000460598759873411	0.000460598759873411	0.0265630863756782	MIF/BCL2/CFLAR/HERPUD1/DDX3X/HMGB2/PTPN2/SKIL/RB1/CSNK2A1/PHIP/NONO/PDIA3	13
BP	GO:0046685	response to arsenic-containing substance	4/220	32/18903	0.000497104688023202	0.000497104688023202	0.0280711528872751	ATF4/DDX3X/VCP/SLC38A2	4
BP	GO:0043388	positive regulation of DNA binding	5/220	57/18903	0.000522290228576365	0.000522290228576365	0.0285031440100224	HIPK2/HMGB2/RB1/EP300/TXN	5
BP	GO:0045088	regulation of innate immune response	10/220	240/18903	0.000525786151641189	0.000525786151641189	0.0285031440100224	HMGB2/PTPN2/SERPINB9/EP300/CREBBP/PQBP1/GRN/MAP3K7/NONO/LAMP1	10
BP	GO:0036294	cellular response to decreased oxygen levels	8/220	159/18903	0.000558457188851351	0.000558457188851351	0.0296806452279098	BCL2/CFLAR/MALAT1/ATF4/HIPK2/SDHD/VHL/JUND	8
BP	GO:0070482	response to oxygen levels	12/220	337/18903	0.000614239801546895	0.000614239801546895	0.0320175605057339	BCL2/CFLAR/MALAT1/ATF4/HIPK2/DDIT4/REST/SDHD/EP300/CREBBP/VHL/JUND	12
BP	GO:0048545	response to steroid hormone	12/220	339/18903	0.000646996959327479	0.000646996959327479	0.0330887223489227	BCL2/CFLAR/YWHAH/DDIT4/EIF4E/HMGB2/REST/MBP/FOSB/EP300/ZFP36/ALPL	12
BP	GO:0005996	monosaccharide metabolic process	10/220	248/18903	0.000677771044816681	0.000677771044816681	0.0340206713528841	ATF4/SIRT7/MIDN/PTPN2/EP300/MDH2/AKT2/AKR1B1/ADIPOR1/SIK1	10
BP	GO:0031960	response to corticosteroid	8/220	165/18903	0.000712574079959862	0.000712574079959862	0.0343658602491749	BCL2/CFLAR/DDIT4/EIF4E/REST/FOSB/ZFP36/ALPL	8
BP	GO:0001666	response to hypoxia	11/220	296/18903	0.000727408740141654	0.000727408740141654	0.0343658602491749	BCL2/CFLAR/MALAT1/HIPK2/DDIT4/REST/SDHD/EP300/CREBBP/VHL/JUND	11
BP	GO:0044262	cellular carbohydrate metabolic process	11/220	296/18903	0.000727408740141654	0.000727408740141654	0.0343658602491749	STAT3/SIRT7/PPP1R2/MIDN/DDIT4/PTPN2/PHKB/EP300/AKT2/ADIPOR1/SIK1	11
BP	GO:0010506	regulation of autophagy	12/220	344/18903	0.000735362679506616	0.000735362679506616	0.0343658602491749	BCL2/STAT3/PSAP/SESN3/TP53INP1/RAB8A/SVIP/EP300/CAPNS1/MAP3K7/SCOC/SUPT5H	12
BP	GO:0070228	regulation of lymphocyte apoptotic process	5/220	62/18903	0.000770119569398808	0.000770119569398808	0.0349770763985219	MIF/BCL2/TSC22D3/CD27/ZC3H8	5
BP	GO:0031053	primary miRNA processing	3/220	16/18903	0.000778609936789282	0.000778609936789282	0.0349770763985219	STAT3/DDX3X/NCBP2	3
BP	GO:0045732	positive regulation of protein catabolic process	9/220	209/18903	0.000787154010599746	0.000787154010599746	0.0349770763985219	RNF19A/HERPUD1/SNX9/VCP/SNF8/CSNK2A1/MYLIP/PSMC2/NDFIP1	9
BP	GO:0070059	intrinsic apoptotic signaling pathway in response to endoplasmic reticulum stress	5/220	63/18903	0.00082868926658022	0.00082868926658022	0.0362287752367414	BCL2/ATF4/HERPUD1/PPP1R15A/PTPN2	5
BP	GO:0070229	negative regulation of lymphocyte apoptotic process	4/220	37/18903	0.000872437653001255	0.000872437653001255	0.0371348812828632	MIF/BCL2/TSC22D3/CD27	4
BP	GO:0002218	activation of innate immune response	5/220	64/18903	0.00089051608513274	0.00089051608513274	0.0371348812828632	EP300/CREBBP/PQBP1/MAP3K7/NONO	5
BP	GO:0071384	cellular response to corticosteroid stimulus	5/220	64/18903	0.00089051608513274	0.00089051608513274	0.0371348812828632	CFLAR/DDIT4/EIF4E/REST/ZFP36	5
BP	GO:0051983	regulation of chromosome segregation	7/220	132/18903	0.000906278517659445	0.000906278517659445	0.0372195722962212	SMARCB1/IK/RB1/CSNK2A1/RCC2/ARID2/DUSP1	7
BP	GO:0010224	response to UV-B	3/220	17/18903	0.000937371108697085	0.000937371108697085	0.0379219262355851	BCL2/CRIP1/XPC	3
BP	GO:0051304	chromosome separation	7/220	135/18903	0.00103387719081782	0.00103387719081782	0.0409605989808127	SMARCB1/IK/RB1/CSNK2A1/ARID2/SMARCAD1/DUSP1	7
BP	GO:0071453	cellular response to oxygen levels	8/220	175/18903	0.00104416846951903	0.00104416846951903	0.0409605989808127	BCL2/CFLAR/MALAT1/ATF4/HIPK2/SDHD/VHL/JUND	8
BP	GO:0032392	DNA geometric change	6/220	99/18903	0.00105781741057244	0.00105781741057244	0.0409605989808127	CHD6/DDX3X/CHD2/HMGB2/SMARCAD1/HELQ	6
BP	GO:0030888	regulation of B cell proliferation	5/220	67/18903	0.00109666492726604	0.00109666492726604	0.0414091579566998	MIF/TNFRSF13C/BCL2/GPR183/TNFRSF13B	5
BP	GO:0019080	viral gene expression	6/220	100/18903	0.00111459542219105	0.00111459542219105	0.0414091579566998	SMARCB1/REST/MDFIC/RSF1/EP300/ZFP36	6
BP	GO:0036499	PERK-mediated unfolded protein response	3/220	18/18903	0.00111523305021248	0.00111523305021248	0.0414091579566998	ATF4/PPP1R15A/PTPN2	3
BP	GO:0140467	integrated stress response signaling	4/220	40/18903	0.0011748179385959	0.0011748179385959	0.0430320937679154	ATF4/PPP1R15A/CREBZF/PTPN2	4
BP	GO:0008380	RNA splicing	14/220	469/18903	0.00124116377815309	0.00124116377815309	0.0448560944385154	PRPF38B/IK/ZRANB2/TRA2B/REST/RBM23/WBP11/PQBP1/SLC38A2/SON/RNU11/NONO/NCBP2/NSRP1	14
BP	GO:0016236	macroautophagy	11/220	317/18903	0.00126737032834824	0.00126737032834824	0.0450506123259423	SQSTM1/SESN3/TP53INP1/VCP/SNF8/CAPNS1/MAP3K7/SCOC/SUPT5H/ATG16L2/VPS25	11
BP	GO:0070232	regulation of T cell apoptotic process	4/220	41/18903	0.00129007456495288	0.00129007456495288	0.0450506123259423	BCL2/TSC22D3/CD27/ZC3H8	4
BP	GO:0030098	lymphocyte differentiation	13/220	419/18903	0.00130751738460881	0.00130751738460881	0.0450506123259423	BCL2/GPR183/STAT3/CD27/SMARCB1/PTPN2/ZC3H8/EP300/ARID2/LY9/DOCK2/KLF6/NDFIP1	13
BP	GO:0046782	regulation of viral transcription	3/220	19/18903	0.00131302852623766	0.00131302852623766	0.0450506123259423	MDFIC/RSF1/ZFP36	3
BP	GO:0016032	viral process	13/220	421/18903	0.00136433758326863	0.00136433758326863	0.046225911538378	BCL2/SMARCB1/DDX3X/VCP/REST/MDFIC/SNF8/RSF1/EP300/ZFP36/LAMP1/PKN2/ATG16L2	13
BP	GO:0038061	NIK/NF-kappaB signaling	7/220	142/18903	0.00138670018955585	0.00138670018955585	0.0464035476037208	CD27/DDX3X/REL/EP300/MAP3K7/ADIPOR1/PDCD4	7
BP	GO:0032479	regulation of type I interferon production	6/220	105/18903	0.00143435166030484	0.00143435166030484	0.0464106920406575	DDX3X/HMGB2/REL/PQBP1/TRAF3/OTUD5	6
BP	GO:0032606	type I interferon production	6/220	105/18903	0.00143435166030484	0.00143435166030484	0.0464106920406575	DDX3X/HMGB2/REL/PQBP1/TRAF3/OTUD5	6
BP	GO:0045862	positive regulation of proteolysis	12/220	372/18903	0.00143828086401727	0.00143828086401727	0.0464106920406575	CFLAR/STAT3/RNF19A/HERPUD1/DDX3X/SNX9/VCP/REST/MBP/GRN/PSMC2/FBXW11	12
BP	GO:0006379	mRNA cleavage	3/220	20/18903	0.00153155374792636	0.00153155374792636	0.0486953416911264	POLR2I/PCF11/NCBP2	3
BP	GO:0031647	regulation of protein stability	11/220	325/18903	0.00154501336550098	0.00154501336550098	0.0486953416911264	BCL2/KRAS/TNIP2/EP300/CREBBP/MYLIP/VHL/GRN/LAMP1/FBXW11/SEC16A	11
BP	GO:0045089	positive regulation of innate immune response	7/220	145/18903	0.00156398345973747	0.00156398345973747	0.0487266474146883	HMGB2/EP300/CREBBP/PQBP1/MAP3K7/NONO/LAMP1	7
BP	GO:0031331	positive regulation of cellular catabolic process	13/220	429/18903	0.00161260720262902	0.00161260720262902	0.0496706165881546	RNF19A/HERPUD1/CNOT6L/SNX9/SESN3/TP53INP1/VCP/SVIP/ZFP36/MAP3K7/SCOC/AKT2/SUPT5H	13
BP	GO:1901522	positive regulation of transcription from RNA polymerase II promoter involved in cellular response to chemical stimulus	3/220	21/18903	0.0017715692697091	0.0017715692697091	0.0533506534037584	ATF4/CHD6/EP300	3
BP	GO:1903204	negative regulation of oxidative stress-induced neuron death	3/220	21/18903	0.0017715692697091	0.0017715692697091	0.0533506534037584	ATF4/REST/NONO	3
BP	GO:0007059	chromosome segregation	12/220	382/18903	0.00179601168482774	0.00179601168482774	0.0533506534037584	SMARCB1/IK/SIRT7/DDX3X/RB1/TOP1/CSNK2A1/RCC2/ARID2/SMARCAD1/DUSP1/PMF1	12
BP	GO:1904035	regulation of epithelial cell apoptotic process	6/220	110/18903	0.00181971137789652	0.00181971137789652	0.0533506534037584	BCL2/CFLAR/TNIP2/RB1/ZFP36/PDCD4	6
BP	GO:0030890	positive regulation of B cell proliferation	4/220	45/18903	0.00183049717600856	0.00183049717600856	0.0533506534037584	MIF/TNFRSF13C/BCL2/GPR183	4
BP	GO:1905818	regulation of chromosome separation	6/220	111/18903	0.00190537333318601	0.00190537333318601	0.0549421761808956	SMARCB1/IK/RB1/CSNK2A1/ARID2/DUSP1	6
BP	GO:0071456	cellular response to hypoxia	7/220	151/18903	0.00197120396859914	0.00197120396859914	0.0562421076913329	BCL2/CFLAR/MALAT1/HIPK2/SDHD/VHL/JUND	7
BP	GO:0002223	stimulatory C-type lectin receptor signaling pathway	3/220	22/18903	0.00203380086871337	0.00203380086871337	0.0562517426094192	EP300/CREBBP/MAP3K7	3
BP	GO:1990840	response to lectin	3/220	22/18903	0.00203380086871337	0.00203380086871337	0.0562517426094192	EP300/CREBBP/MAP3K7	3
BP	GO:1990858	cellular response to lectin	3/220	22/18903	0.00203380086871337	0.00203380086871337	0.0562517426094192	EP300/CREBBP/MAP3K7	3
BP	GO:0006354	DNA-templated transcription elongation	9/220	241/18903	0.00211361268820208	0.00211361268820208	0.0577537178788693	SMARCB1/POLR2I/RSF1/EP300/CREBBP/VHL/CAMTA1/SUPT5H/NCBP2	9
BP	GO:0062012	regulation of small molecule metabolic process	11/220	339/18903	0.00214995149183726	0.00214995149183726	0.0577537178788693	STAT3/SIRT7/MIDN/DDIT4/VCP/PTPN2/REST/EP300/AKT2/ADIPOR1/SIK1	11
BP	GO:0006984	ER-nucleus signaling pathway	4/220	47/18903	0.00215202688562233	0.00215202688562233	0.0577537178788693	ATF4/PPP1R15A/CREBZF/PTPN2	4
BP	GO:2001236	regulation of extrinsic apoptotic signaling pathway	7/220	155/18903	0.00228528802533054	0.00228528802533054	0.0594917333285397	BCL2/CFLAR/DDX3X/HMGB2/SKIL/PHIP/PDIA3	7
BP	GO:0002363	alpha-beta T cell lineage commitment	3/220	23/18903	0.00231894040688387	0.00231894040688387	0.0594917333285397	BCL2/STAT3/LY9	3
BP	GO:0048169	regulation of long-term neuronal synaptic plasticity	3/220	23/18903	0.00231894040688387	0.00231894040688387	0.0594917333285397	KRAS/RAB8A/SYNGR1	3
BP	GO:0031648	protein destabilization	4/220	48/18903	0.00232653108589668	0.00232653108589668	0.0594917333285397	EP300/CREBBP/MYLIP/FBXW11	4
BP	GO:0032527	protein exit from endoplasmic reticulum	4/220	48/18903	0.00232653108589668	0.00232653108589668	0.0594917333285397	HERPUD1/VCP/SVIP/SEC16A	4
BP	GO:0034728	nucleosome organization	7/220	156/18903	0.00236952609506819	0.00236952609506819	0.0600248863236655	SMARCB1/BRD2/CHD2/HMGB2/RSF1/ARID2/TSPYL2	7
BP	GO:0070227	lymphocyte apoptotic process	5/220	80/18903	0.00241695679096264	0.00241695679096264	0.0606594906113919	MIF/BCL2/TSC22D3/CD27/ZC3H8	5
BP	GO:0030217	T cell differentiation	10/220	296/18903	0.00253564152186755	0.00253564152186755	0.062317792437186	BCL2/GPR183/STAT3/CD27/SMARCB1/PTPN2/ZC3H8/ARID2/LY9/DOCK2	10
BP	GO:0000380	alternative mRNA splicing, via spliceosome	5/220	81/18903	0.00255200435436942	0.00255200435436942	0.062317792437186	TRA2B/REST/PQBP1/NCBP2/NSRP1	5
BP	GO:0072332	intrinsic apoptotic signaling pathway by p53 class mediator	5/220	81/18903	0.00255200435436942	0.00255200435436942	0.062317792437186	MIF/BCL2/HIPK2/DDIT4/EP300	5
BP	GO:0043369	CD4-positive or CD8-positive, alpha-beta T cell lineage commitment	3/220	24/18903	0.00262764667610337	0.00262764667610337	0.0630292518953534	BCL2/STAT3/LY9	3
BP	GO:0070233	negative regulation of T cell apoptotic process	3/220	24/18903	0.00262764667610337	0.00262764667610337	0.0630292518953534	BCL2/TSC22D3/CD27	3
BP	GO:0006446	regulation of translational initiation	5/220	82/18903	0.00269244461769564	0.00269244461769564	0.0637397187225238	ATF4/DDX3X/PPP1R15A/EIF5/NCBP2	5
BP	GO:1902041	regulation of extrinsic apoptotic signaling pathway via death domain receptors	4/220	50/18903	0.00270429680405271	0.00270429680405271	0.0637397187225238	CFLAR/DDX3X/HMGB2/SKIL	4
BP	GO:0007034	vacuolar transport	7/220	162/18903	0.00292636729991995	0.00292636729991995	0.0669511562371481	PSAP/VCP/SNF8/GRN/LAMP1/VPS25/NDFIP1	7
BP	GO:0050792	regulation of viral process	7/220	162/18903	0.00292636729991995	0.00292636729991995	0.0669511562371481	BCL2/DDX3X/MDFIC/SNF8/RSF1/ZFP36/PKN2	7
BP	GO:0048511	rhythmic process	10/220	302/18903	0.0029280713290064	0.0029280713290064	0.0669511562371481	ATF4/EP300/TOP1/CSNK2A1/CREBBP/BHLHE41/NONO/SIK1/JUND/FBXW11	10
BP	GO:0051101	regulation of DNA binding	6/220	121/18903	0.00293935076217848	0.00293935076217848	0.0669511562371481	HIPK2/HMGB2/RSF1/RB1/EP300/TXN	6
BP	GO:0006289	nucleotide-excision repair	5/220	84/18903	0.00298999445441229	0.00298999445441229	0.0671748102955387	SMARCB1/POLR2I/ERCC1/XPC/ARID2	5
BP	GO:1901990	regulation of mitotic cell cycle phase transition	11/220	354/18903	0.00299873570620279	0.00299873570620279	0.0671748102955387	BCL2/SMARCB1/IK/DDX3X/XPC/RB1/RCC2/ARID2/WEE1/DUSP1/CCND2	11
BP	GO:0032869	cellular response to insulin stimulus	8/220	208/18903	0.00308561591317652	0.00308561591317652	0.0685544519105223	CFLAR/SESN3/PTPN2/RAB8A/RB1/PHIP/AKT2/ADIPOR1	8
BP	GO:0008625	extrinsic apoptotic signaling pathway via death domain receptors	5/220	85/18903	0.00314734974550968	0.00314734974550968	0.0693575147170512	BCL2/CFLAR/DDX3X/HMGB2/SKIL	5
BP	GO:0006413	translational initiation	6/220	123/18903	0.00318845798610003	0.00318845798610003	0.069696768371881	ATF4/DDX3X/EIF4E/PPP1R15A/EIF5/NCBP2	6
BP	GO:0007623	circadian rhythm	8/220	210/18903	0.00327067479527	0.00327067479527	0.0707947191187808	ATF4/EP300/TOP1/BHLHE41/NONO/SIK1/JUND/FBXW11	8
BP	GO:0031349	positive regulation of defense response	10/220	307/18903	0.00329092344796818	0.00329092344796818	0.0707947191187808	NEAT1/HMGB2/EP300/CREBBP/PQBP1/GRN/MAP3K7/NONO/LAMP1/PDCD4	10
BP	GO:0046426	negative regulation of receptor signaling pathway via JAK-STAT	3/220	26/18903	0.00331823417899952	0.00331823417899952	0.0708201658592934	PTPN2/VHL/ADIPOR1	3
BP	GO:0006111	regulation of gluconeogenesis	4/220	53/18903	0.00334660624371519	0.00334660624371519	0.0708676897826203	SIRT7/PTPN2/EP300/SIK1	4
BP	GO:0016051	carbohydrate biosynthetic process	8/220	212/18903	0.00346424963591436	0.00346424963591436	0.0727902310279843	ATF4/SIRT7/PTPN2/EP300/MDH2/AKT2/AKR1B1/SIK1	8
BP	GO:0042254	ribosome biogenesis	10/220	310/18903	0.00352526742875524	0.00352526742875524	0.0735025395064351	RPL38/RPS28/RPS21/SIRT7/WDR74/RSL1D1/DDX3X/WBP11/C1D/HELQ	10
BP	GO:0042149	cellular response to glucose starvation	4/220	54/18903	0.00358187242083594	0.00358187242083594	0.0740019382582551	BCL2/ATF4/SESN3/SIK1	4
BP	GO:2001020	regulation of response to DNA damage stimulus	10/220	312/18903	0.00368873164551454	0.00368873164551454	0.0740019382582551	MIF/BCL2/SMARCB1/SIRT7/UBE2V1/ERCC1/SKIL/ARID2/HELQ/TERF2	10
BP	GO:0018027	peptidyl-lysine dimethylation	3/220	27/18903	0.00370127502010565	0.00370127502010565	0.0740019382582551	EHMT1/SMARCB1/SETBP1	3
BP	GO:0071549	cellular response to dexamethasone stimulus	3/220	27/18903	0.00370127502010565	0.00370127502010565	0.0740019382582551	CFLAR/DDIT4/EIF4E	3
BP	GO:2000737	negative regulation of stem cell differentiation	3/220	27/18903	0.00370127502010565	0.00370127502010565	0.0740019382582551	STAT3/REST/ZFP36	3
BP	GO:0044772	mitotic cell cycle phase transition	13/220	473/18903	0.00374033097643181	0.00374033097643181	0.0740019382582551	BCL2/SMARCB1/IK/SIRT7/DDX3X/EIF4E/XPC/RB1/RCC2/ARID2/WEE1/DUSP1/CCND2	13
BP	GO:1903131	mononuclear cell differentiation	13/220	473/18903	0.00374033097643181	0.00374033097643181	0.0740019382582551	BCL2/GPR183/STAT3/CD27/SMARCB1/PTPN2/ZC3H8/EP300/ARID2/LY9/DOCK2/KLF6/NDFIP1	13
BP	GO:1903202	negative regulation of oxidative stress-induced cell death	4/220	55/18903	0.00382812316345369	0.00382812316345369	0.0746491264361473	ATF4/REST/NONO/TXN	4
BP	GO:2000107	negative regulation of leukocyte apoptotic process	4/220	55/18903	0.00382812316345369	0.00382812316345369	0.0746491264361473	MIF/BCL2/TSC22D3/CD27	4
BP	GO:0030218	erythrocyte differentiation	6/220	128/18903	0.0038799624355703	0.0038799624355703	0.0751195734706279	STAT3/HIPK2/HMGB2/PTPN2/RB1/ZFP36	6
BP	GO:0045931	positive regulation of mitotic cell cycle	6/220	129/18903	0.00403062236711037	0.00403062236711037	0.0769373802469177	DDX3X/EIF4E/RB1/RCC2/PKN2/CCND2	6
BP	GO:0051224	negative regulation of protein transport	6/220	129/18903	0.00403062236711037	0.00403062236711037	0.0769373802469177	MIDN/REST/MDFIC/SVIP/TXN/NDFIP1	6
BP	GO:2001242	regulation of intrinsic apoptotic signaling pathway	7/220	172/18903	0.00407087926320071	0.00407087926320071	0.0771624151839664	MIF/BCL2/HERPUD1/DDX3X/PTPN2/SKIL/NONO	7
BP	GO:0019079	viral genome replication	6/220	130/18903	0.00418557071472674	0.00418557071472674	0.0787854136726707	BCL2/SMARCB1/DDX3X/VCP/PKN2/ATG16L2	6
BP	GO:0016072	rRNA metabolic process	9/220	268/18903	0.00427219310455629	0.00427219310455629	0.0796165384277135	RPS28/RPS21/SMARCB1/SIRT7/WDR74/RSL1D1/WBP11/C1D/HELQ	9
BP	GO:0032608	interferon-beta production	4/220	57/18903	0.00435452453314334	0.00435452453314334	0.0796165384277135	DDX3X/HMGB2/REL/TRAF3	4
BP	GO:0032648	regulation of interferon-beta production	4/220	57/18903	0.00435452453314334	0.00435452453314334	0.0796165384277135	DDX3X/HMGB2/REL/TRAF3	4
BP	GO:0070231	T cell apoptotic process	4/220	57/18903	0.00435452453314334	0.00435452453314334	0.0796165384277135	BCL2/TSC22D3/CD27/ZC3H8	4
BP	GO:0032868	response to insulin	9/220	269/18903	0.00437659068522052	0.00437659068522052	0.0796165384277135	CFLAR/SESN3/PTPN2/RAB8A/RB1/PHIP/AKT2/ADIPOR1/ALPL	9
BP	GO:0030071	regulation of mitotic metaphase/anaphase transition	5/220	92/18903	0.00442045000432951	0.00442045000432951	0.0798783070957789	SMARCB1/IK/RB1/ARID2/DUSP1	5
BP	GO:0030970	retrograde protein transport, ER to cytosol	3/220	29/18903	0.00454552481160068	0.00454552481160068	0.0809363620014716	HERPUD1/VCP/SVIP	3
BP	GO:1903513	endoplasmic reticulum to cytosol transport	3/220	29/18903	0.00454552481160068	0.00454552481160068	0.0809363620014716	HERPUD1/VCP/SVIP	3
BP	GO:0032508	DNA duplex unwinding	5/220	93/18903	0.00462830264260843	0.00462830264260843	0.0809363620014716	CHD6/DDX3X/CHD2/SMARCAD1/HELQ	5
BP	GO:0045185	maintenance of protein location	5/220	93/18903	0.00462830264260843	0.00462830264260843	0.0809363620014716	SRGN/TMSB10/G3BP2/TXN/NRROS	5
BP	GO:2000106	regulation of leukocyte apoptotic process	5/220	93/18903	0.00462830264260843	0.00462830264260843	0.0809363620014716	MIF/BCL2/TSC22D3/CD27/ZC3H8	5
BP	GO:1904950	negative regulation of establishment of protein localization	6/220	133/18903	0.00467687220759984	0.00467687220759984	0.0812614435531011	MIDN/REST/MDFIC/SVIP/TXN/NDFIP1	6
BP	GO:0097191	extrinsic apoptotic signaling pathway	8/220	224/18903	0.00481925755059433	0.00481925755059433	0.0832020663277265	BCL2/CFLAR/CD27/DDX3X/HMGB2/SKIL/PHIP/PDIA3	8
BP	GO:0001659	temperature homeostasis	7/220	178/18903	0.00490388187504097	0.00490388187504097	0.0841272207077314	SQSTM1/ATF4/STAT3/EHMT1/RB1/ADIPOR1/ALPL	7
BP	GO:0002360	T cell lineage commitment	3/220	30/18903	0.00500771650955312	0.00500771650955312	0.0847408500249526	BCL2/STAT3/LY9	3
BP	GO:1903203	regulation of oxidative stress-induced neuron death	3/220	30/18903	0.00500771650955312	0.00500771650955312	0.0847408500249526	ATF4/REST/NONO	3
BP	GO:0007091	metaphase/anaphase transition of mitotic cell cycle	5/220	95/18903	0.00506470556071464	0.00506470556071464	0.0847408500249526	SMARCB1/IK/RB1/ARID2/DUSP1	5
BP	GO:1902099	regulation of metaphase/anaphase transition of cell cycle	5/220	95/18903	0.00506470556071464	0.00506470556071464	0.0847408500249526	SMARCB1/IK/RB1/ARID2/DUSP1	5
BP	GO:0043484	regulation of RNA splicing	7/220	180/18903	0.00520822349863212	0.00520822349863212	0.0856343756336543	TRA2B/REST/RBM23/PQBP1/SLC38A2/SON/NSRP1	7
BP	GO:0071824	protein-DNA complex subunit organization	9/220	277/18903	0.00528524087086792	0.00528524087086792	0.0856343756336543	SMARCB1/BRD2/CHD2/HMGB2/BDP1/RSF1/RB1/ARID2/TSPYL2	9
BP	GO:0000377	RNA splicing, via transesterification reactions with bulged adenosine as nucleophile	10/220	329/18903	0.0053343173820382	0.0053343173820382	0.0856343756336543	IK/TRA2B/REST/RBM23/WBP11/PQBP1/SON/RNU11/NCBP2/NSRP1	10
BP	GO:0000398	mRNA splicing, via spliceosome	10/220	329/18903	0.0053343173820382	0.0053343173820382	0.0856343756336543	IK/TRA2B/REST/RBM23/WBP11/PQBP1/SON/RNU11/NCBP2/NSRP1	10
BP	GO:0034101	erythrocyte homeostasis	6/220	137/18903	0.00539638763906128	0.00539638763906128	0.0856343756336543	STAT3/HIPK2/HMGB2/PTPN2/RB1/ZFP36	6
BP	GO:1904019	epithelial cell apoptotic process	6/220	137/18903	0.00539638763906128	0.00539638763906128	0.0856343756336543	BCL2/CFLAR/TNIP2/RB1/ZFP36/PDCD4	6
BP	GO:0006364	rRNA processing	8/220	229/18903	0.00549082996879288	0.00549082996879288	0.0856343756336543	RPS28/RPS21/SIRT7/WDR74/RSL1D1/WBP11/C1D/HELQ	8
BP	GO:0034470	ncRNA processing	12/220	439/18903	0.00549157277932592	0.00549157277932592	0.0856343756336543	RPS28/RPS21/STAT3/SIRT7/WDR74/RSL1D1/DDX3X/WBP11/C1D/NCBP2/HELQ/TSNAX	12
BP	GO:0002220	innate immune response activating cell surface receptor signaling pathway	3/220	31/18903	0.0054972280746575	0.0054972280746575	0.0856343756336543	EP300/CREBBP/MAP3K7	3
BP	GO:0006099	tricarboxylic acid cycle	3/220	31/18903	0.0054972280746575	0.0054972280746575	0.0856343756336543	SDHB/SDHD/MDH2	3
BP	GO:0031365	N-terminal protein amino acid modification	3/220	31/18903	0.0054972280746575	0.0054972280746575	0.0856343756336543	NMT1/EP300/CREBBP	3
BP	GO:1902042	negative regulation of extrinsic apoptotic signaling pathway via death domain receptors	3/220	31/18903	0.0054972280746575	0.0054972280746575	0.0856343756336543	CFLAR/DDX3X/HMGB2	3
BP	GO:0070918	small regulatory ncRNA processing	4/220	61/18903	0.00554936662334961	0.00554936662334961	0.0859525958203022	STAT3/DDX3X/NCBP2/TSNAX	4
BP	GO:0031848	protection from non-homologous end joining at telomere	2/220	10/18903	0.0057057200569822	0.0057057200569822	0.0861356893954928	ERCC1/TERF2	2
BP	GO:0033085	negative regulation of T cell differentiation in thymus	2/220	10/18903	0.0057057200569822	0.0057057200569822	0.0861356893954928	PTPN2/ZC3H8	2
BP	GO:1905461	positive regulation of vascular associated smooth muscle cell apoptotic process	2/220	10/18903	0.0057057200569822	0.0057057200569822	0.0861356893954928	ATF4/PDCD4	2
BP	GO:0010965	regulation of mitotic sister chromatid separation	5/220	98/18903	0.00577284915427797	0.00577284915427797	0.0861356893954928	SMARCB1/IK/RB1/ARID2/DUSP1	5
BP	GO:0044784	metaphase/anaphase transition of cell cycle	5/220	98/18903	0.00577284915427797	0.00577284915427797	0.0861356893954928	SMARCB1/IK/RB1/ARID2/DUSP1	5
BP	GO:0050684	regulation of mRNA processing	6/220	139/18903	0.00578507511826997	0.00578507511826997	0.0861356893954928	TRA2B/REST/RBM23/SON/NCBP2/NSRP1	6
BP	GO:0000375	RNA splicing, via transesterification reactions	10/220	333/18903	0.00579442441562195	0.00579442441562195	0.0861356893954928	IK/TRA2B/REST/RBM23/WBP11/PQBP1/SON/RNU11/NCBP2/NSRP1	10
BP	GO:0032387	negative regulation of intracellular transport	4/220	62/18903	0.00587896986844965	0.00587896986844965	0.0861356893954928	MDFIC/SVIP/ARHGAP1/TXN	4
BP	GO:0043030	regulation of macrophage activation	4/220	62/18903	0.00587896986844965	0.00587896986844965	0.0861356893954928	MIF/TNIP2/GRN/JUND	4
BP	GO:1904036	negative regulation of epithelial cell apoptotic process	4/220	62/18903	0.00587896986844965	0.00587896986844965	0.0861356893954928	BCL2/CFLAR/TNIP2/RB1	4
BP	GO:0002758	innate immune response-activating signal transduction	3/220	32/18903	0.00601448221810243	0.00601448221810243	0.0869545854041311	EP300/CREBBP/MAP3K7	3
BP	GO:2001237	negative regulation of extrinsic apoptotic signaling pathway	5/220	99/18903	0.00602364871511339	0.00602364871511339	0.0869545854041311	BCL2/CFLAR/DDX3X/HMGB2/PHIP	5
BP	GO:2000045	regulation of G1/S transition of mitotic cell cycle	7/220	185/18903	0.00603110250608847	0.00603110250608847	0.0869545854041311	BCL2/SMARCB1/DDX3X/RB1/ARID2/WEE1/CCND2	7
BP	GO:0036473	cell death in response to oxidative stress	5/220	100/18903	0.00628201994105666	0.00628201994105666	0.0895801908333323	BCL2/ATF4/REST/NONO/TXN	5
BP	GO:0032496	response to lipopolysaccharide	10/220	339/18903	0.00654210715671478	0.00654210715671478	0.0895801908333323	MIF/ARID5A/HMGB2/TNIP2/ZFP36/HADHB/OTUD5/JUND/PDCD4/ALPL	10
BP	GO:0051306	mitotic sister chromatid separation	5/220	101/18903	0.00654807923278281	0.00654807923278281	0.0895801908333323	SMARCB1/IK/RB1/ARID2/DUSP1	5
BP	GO:2001243	negative regulation of intrinsic apoptotic signaling pathway	5/220	101/18903	0.00654807923278281	0.00654807923278281	0.0895801908333323	MIF/BCL2/HERPUD1/DDX3X/NONO	5
BP	GO:0001782	B cell homeostasis	3/220	33/18903	0.00655987546936678	0.00655987546936678	0.0895801908333323	MIF/BCL2/TNFRSF13B	3
BP	GO:0030511	positive regulation of transforming growth factor beta receptor signaling pathway	3/220	33/18903	0.00655987546936678	0.00655987546936678	0.0895801908333323	HIPK2/EP300/CREBBP	3
BP	GO:0036475	neuron death in response to oxidative stress	3/220	33/18903	0.00655987546936678	0.00655987546936678	0.0895801908333323	ATF4/REST/NONO	3
BP	GO:0045879	negative regulation of smoothened signaling pathway	3/220	33/18903	0.00655987546936678	0.00655987546936678	0.0895801908333323	PTCH2/VCP/RB1	3
BP	GO:1903846	positive regulation of cellular response to transforming growth factor beta stimulus	3/220	33/18903	0.00655987546936678	0.00655987546936678	0.0895801908333323	HIPK2/EP300/CREBBP	3
BP	GO:1904893	negative regulation of receptor signaling pathway via STAT	3/220	33/18903	0.00655987546936678	0.00655987546936678	0.0895801908333323	PTPN2/VHL/ADIPOR1	3
BP	GO:0048524	positive regulation of viral process	4/220	64/18903	0.0065767514862297	0.0065767514862297	0.0895801908333323	DDX3X/MDFIC/RSF1/PKN2	4
BP	GO:0010508	positive regulation of autophagy	6/220	144/18903	0.00684583162940371	0.00684583162940371	0.0909446295830097	SESN3/TP53INP1/SVIP/MAP3K7/SCOC/SUPT5H	6
BP	GO:0010918	positive regulation of mitochondrial membrane potential	2/220	11/18903	0.00692043712255207	0.00692043712255207	0.0909446295830097	VCP/AKT2	2
BP	GO:0033210	leptin-mediated signaling pathway	2/220	11/18903	0.00692043712255207	0.00692043712255207	0.0909446295830097	STAT3/ADIPOR1	2
BP	GO:0036490	regulation of translation in response to endoplasmic reticulum stress	2/220	11/18903	0.00692043712255207	0.00692043712255207	0.0909446295830097	DDX3X/PPP1R15A	2
BP	GO:1903897	regulation of PERK-mediated unfolded protein response	2/220	11/18903	0.00692043712255207	0.00692043712255207	0.0909446295830097	PPP1R15A/PTPN2	2
BP	GO:1905050	positive regulation of metallopeptidase activity	2/220	11/18903	0.00692043712255207	0.00692043712255207	0.0909446295830097	STAT3/MBP	2
BP	GO:1905634	regulation of protein localization to chromatin	2/220	11/18903	0.00692043712255207	0.00692043712255207	0.0909446295830097	VCP/RB1	2
BP	GO:0048857	neural nucleus development	4/220	65/18903	0.00694534423592189	0.00694534423592189	0.0909446295830097	BCL2/YWHAH/MBP/SEC16A	4
BP	GO:0051403	stress-activated MAPK cascade	8/220	239/18903	0.00704606167186741	0.00704606167186741	0.0916985896004134	CD27/HIPK2/MDFIC/ZFP36/TRAF3/MAP3K7/DUSP1/PDCD4	8
BP	GO:0043255	regulation of carbohydrate biosynthetic process	5/220	103/18903	0.00710372365759121	0.00710372365759121	0.0916985896004134	SIRT7/PTPN2/EP300/AKT2/SIK1	5
BP	GO:0051090	regulation of DNA-binding transcription factor activity	12/220	454/18903	0.0071044150001097	0.0071044150001097	0.0916985896004134	CFLAR/STAT3/G3BP2/SMARCB1/HIPK2/UBE2V1/CREBZF/RB1/EP300/TRAF3/MAP3K7/SIK1	12
BP	GO:0031333	negative regulation of protein-containing complex assembly	6/220	146/18903	0.007307267194575	0.007307267194575	0.0938698579497662	TMSB10/DDX3X/LMO4/SPTAN1/SVIP/EP300	6
BP	GO:0042100	B cell proliferation	5/220	104/18903	0.00739353751440136	0.00739353751440136	0.0940862816880825	MIF/TNFRSF13C/BCL2/GPR183/TNFRSF13B	5
BP	GO:1902882	regulation of response to oxidative stress	5/220	104/18903	0.00739353751440136	0.00739353751440136	0.0940862816880825	ATF4/SESN3/REST/NONO/TXN	5
BP	GO:1901796	regulation of signal transduction by p53 class mediator	5/220	105/18903	0.00769149680710618	0.00769149680710618	0.0955089149577181	MIF/BCL2/RPS20/HIPK2/EP300	5
BP	GO:0006303	double-strand break repair via nonhomologous end joining	4/220	67/18903	0.00772293976255738	0.00772293976255738	0.0955089149577181	SIRT7/HMGB2/ERCC1/HELQ	4
BP	GO:1901224	positive regulation of NIK/NF-kappaB signaling	4/220	67/18903	0.00772293976255738	0.00772293976255738	0.0955089149577181	CD27/DDX3X/EP300/PDCD4	4
BP	GO:0006301	postreplication repair	3/220	35/18903	0.00773653863447199	0.00773653863447199	0.0955089149577181	REV3L/UBE2V1/VCP	3
BP	GO:0043276	anoikis	3/220	35/18903	0.00773653863447199	0.00773653863447199	0.0955089149577181	BCL2/MAP3K7/SIK1	3
BP	GO:0060218	hematopoietic stem cell differentiation	3/220	35/18903	0.00773653863447199	0.00773653863447199	0.0955089149577181	BCL2/CHD2/ZFP36	3
BP	GO:0010952	positive regulation of peptidase activity	7/220	194/18903	0.00775198571889828	0.00775198571889828	0.0955089149577181	CFLAR/STAT3/DDX3X/VCP/REST/MBP/GRN	7
BP	GO:0140289	protein mono-ADP-ribosylation	2/220	12/18903	0.00824120724380428	0.00824120724380428	0.100656707414458	PARP15/PARP8	2
BP	GO:1903844	regulation of cellular response to transforming growth factor beta stimulus	6/220	150/18903	0.00829695128770949	0.00829695128770949	0.100656707414458	CFLAR/HIPK2/SKIL/EP300/CREBBP/NRROS	6
BP	GO:0033045	regulation of sister chromatid segregation	5/220	107/18903	0.00831229908931465	0.00831229908931465	0.100656707414458	SMARCB1/IK/RB1/ARID2/DUSP1	5
BP	GO:0031098	stress-activated protein kinase signaling cascade	8/220	246/18903	0.00831834848069776	0.00831834848069776	0.100656707414458	CD27/HIPK2/MDFIC/ZFP36/TRAF3/MAP3K7/DUSP1/PDCD4	8
BP	GO:0050869	negative regulation of B cell activation	3/220	36/18903	0.00836847684460608	0.00836847684460608	0.10081322982391	TNFRSF13B/SAMSN1/NDFIP1	3
BP	GO:0007265	Ras protein signal transduction	10/220	353/18903	0.00857850610127033	0.00857850610127033	0.102886135122362	SQSTM1/G3BP2/KRAS/ARHGDIA/GNB1/ARHGEF1/RB1/CYTH1/ELMO1/ARHGAP1	10
BP	GO:0062014	negative regulation of small molecule metabolic process	5/220	108/18903	0.00863536330013578	0.00863536330013578	0.103111803838858	STAT3/DDIT4/REST/EP300/SIK1	5
BP	GO:0006302	double-strand break repair	9/220	300/18903	0.00872429951618292	0.00872429951618292	0.103716857129137	REV3L/SMARCB1/SIRT7/HMGB2/ERCC1/VCP/ARID2/SMARCAD1/HELQ	9
BP	GO:0043254	regulation of protein-containing complex assembly	11/220	410/18903	0.0088010384591523	0.0088010384591523	0.104017462582068	TMSB10/DDX3X/SNX9/LMO4/VCP/CLIP1/SPTAN1/SVIP/RB1/EP300/SLAIN2	11
BP	GO:0030183	B cell differentiation	6/220	152/18903	0.00882633614531334	0.00882633614531334	0.104017462582068	BCL2/GPR183/CD27/PTPN2/EP300/KLF6	6
BP	GO:0048024	regulation of mRNA splicing, via spliceosome	5/220	109/18903	0.00896701531888159	0.00896701531888159	0.105217883099203	TRA2B/REST/RBM23/SON/NSRP1	5
BP	GO:0000082	G1/S transition of mitotic cell cycle	8/220	250/18903	0.00911873619704396	0.00911873619704396	0.106536958744956	BCL2/SMARCB1/DDX3X/EIF4E/RB1/ARID2/WEE1/CCND2	8
BP	GO:0019395	fatty acid oxidation	5/220	110/18903	0.00930736312559516	0.00930736312559516	0.108274045847787	ACAT1/PHYH/AKT2/HADHB/ADIPOR1	5
BP	GO:1903320	regulation of protein modification by small protein conjugation or removal	8/220	252/18903	0.00953986582983279	0.00953986582983279	0.108465160982752	RPS20/SQSTM1/HERPUD1/SIRT7/DDX3X/UBE2V1/VCP/NDFIP1	8
BP	GO:1901222	regulation of NIK/NF-kappaB signaling	5/220	111/18903	0.00965651358750125	0.00965651358750125	0.108465160982752	CD27/DDX3X/EP300/ADIPOR1/PDCD4	5
BP	GO:0050871	positive regulation of B cell activation	6/220	155/18903	0.009665172751693	0.009665172751693	0.108465160982752	MIF/TNFRSF13C/BCL2/GPR183/CD27/TNIP2	6
BP	GO:0038203	TORC2 signaling	2/220	13/18903	0.00966542024417344	0.00966542024417344	0.108465160982752	SESN3/OTUD5	2
BP	GO:0070914	UV-damage excision repair	2/220	13/18903	0.00966542024417344	0.00966542024417344	0.108465160982752	ERCC1/XPC	2
BP	GO:0070932	histone H3 deacetylation	2/220	13/18903	0.00966542024417344	0.00966542024417344	0.108465160982752	SIRT7/SMARCAD1	2
BP	GO:1990253	cellular response to leucine starvation	2/220	13/18903	0.00966542024417344	0.00966542024417344	0.108465160982752	ATF4/SESN3	2
BP	GO:0002209	behavioral defense response	3/220	38/18903	0.00972106000688084	0.00972106000688084	0.108465160982752	BCL2/EIF4E/EP300	3
BP	GO:1902229	regulation of intrinsic apoptotic signaling pathway in response to DNA damage	3/220	38/18903	0.00972106000688084	0.00972106000688084	0.108465160982752	MIF/BCL2/SKIL	3
BP	GO:0090305	nucleic acid phosphodiester bond hydrolysis	8/220	253/18903	0.00975578926833505	0.00975578926833505	0.108465160982752	RPS21/CNOT6L/POLR2I/ERCC1/ZFP36/PCF11/NCBP2/TSNAX	8
BP	GO:0002237	response to molecule of bacterial origin	10/220	360/18903	0.00976397060807841	0.00976397060807841	0.108465160982752	MIF/ARID5A/HMGB2/TNIP2/ZFP36/HADHB/OTUD5/JUND/PDCD4/ALPL	10
BP	GO:0071375	cellular response to peptide hormone stimulus	9/220	306/18903	0.00985187027334938	0.00985187027334938	0.108994912798602	CFLAR/STAT3/SESN3/PTPN2/RAB8A/RB1/PHIP/AKT2/ADIPOR1	9
BP	GO:0042176	regulation of protein catabolic process	10/220	361/18903	0.00994305741946193	0.00994305741946193	0.1095565804669	RNF19A/HERPUD1/SNX9/VCP/SNF8/SVIP/CSNK2A1/MYLIP/PSMC2/NDFIP1	10
BP	GO:0043122	regulation of I-kappaB kinase/NF-kappaB signaling	8/220	255/18903	0.0101985312549405	0.0101985312549405	0.111465271568216	CFLAR/SQSTM1/UBE2V1/REL/TNIP2/TRAF3/MAP3K7/NDFIP1	8
BP	GO:0051402	neuron apoptotic process	8/220	255/18903	0.0101985312549405	0.0101985312549405	0.111465271568216	BCL2/ATF4/KRAS/HIPK2/RB1/GRN/NONO/AKT2	8
BP	GO:0043281	regulation of cysteine-type endopeptidase activity involved in apoptotic process	7/220	205/18903	0.010318634022604	0.010318634022604	0.112325016310316	CFLAR/CD27/DDX3X/VCP/REST/SERPINB9/CSNK2A1	7
BP	GO:1903578	regulation of ATP metabolic process	4/220	73/18903	0.0103926791727992	0.0103926791727992	0.112678521557718	STAT3/DDIT4/VCP/EP300	4
BP	GO:0043618	regulation of transcription from RNA polymerase II promoter in response to stress	3/220	39/18903	0.0104422341240738	0.0104422341240738	0.112764742585406	ATF4/CHD6/VHL	3
BP	GO:0090501	RNA phosphodiester bond hydrolysis	6/220	158/18903	0.0105593833060406	0.0105593833060406	0.113456019989385	RPS21/CNOT6L/POLR2I/PCF11/NCBP2/TSNAX	6
BP	GO:0043434	response to peptide hormone	11/220	421/18903	0.010589962875514	0.010589962875514	0.113456019989385	CFLAR/STAT3/SESN3/PTPN2/RAB8A/RB1/PHIP/AKT2/ADIPOR1/JUND/ALPL	11
BP	GO:0034502	protein localization to chromosome	5/220	115/18903	0.0111432385963407	0.0111432385963407	0.117566577039903	IK/VCP/RB1/RCC2/TERF2	5
BP	GO:0015670	carbon dioxide transport	2/220	14/18903	0.0111905118572739	0.0111905118572739	0.117566577039903	HBB/HBA2	2
BP	GO:0045059	positive thymic T cell selection	2/220	14/18903	0.0111905118572739	0.0111905118572739	0.117566577039903	PTPN2/DOCK2	2
BP	GO:0045820	negative regulation of glycolytic process	2/220	14/18903	0.0111905118572739	0.0111905118572739	0.117566577039903	STAT3/DDIT4	2
BP	GO:0072540	T-helper 17 cell lineage commitment	2/220	14/18903	0.0111905118572739	0.0111905118572739	0.117566577039903	STAT3/LY9	2
BP	GO:0070997	neuron death	10/220	368/18903	0.0112678500394731	0.0112678500394731	0.117832107327884	BCL2/ATF4/KRAS/HIPK2/DDIT4/REST/RB1/GRN/NONO/AKT2	10
BP	GO:0018105	peptidyl-serine phosphorylation	9/220	313/18903	0.0113027302951407	0.0113027302951407	0.117832107327884	MIF/BCL2/HIPK2/DDIT4/TOP1/CSNK2A1/AKT2/PKN2/TXN	9
BP	GO:0071383	cellular response to steroid hormone stimulus	7/220	209/18903	0.0113899777598312	0.0113899777598312	0.117935433470941	CFLAR/YWHAH/DDIT4/EIF4E/REST/EP300/ZFP36	7
BP	GO:0016239	positive regulation of macroautophagy	4/220	75/18903	0.0113996618993853	0.0113996618993853	0.117935433470941	SESN3/MAP3K7/SCOC/SUPT5H	4
BP	GO:0034440	lipid oxidation	5/220	116/18903	0.0115379641785794	0.0115379641785794	0.118912378466448	ACAT1/PHYH/AKT2/HADHB/ADIPOR1	5
BP	GO:0006470	protein dephosphorylation	8/220	261/18903	0.0116164719517435	0.0116164719517435	0.119268003491785	BCL2/PPP1R2/DUSP2/PPP1R15A/PTPN2/CAMTA1/DUSP1/FBXW11	8
BP	GO:0031396	regulation of protein ubiquitination	7/220	210/18903	0.0116699537241264	0.0116699537241264	0.119364968578453	RPS20/SQSTM1/HERPUD1/SIRT7/DDX3X/UBE2V1/NDFIP1	7
BP	GO:0071887	leukocyte apoptotic process	5/220	117/18903	0.0119421084992851	0.0119421084992851	0.12066887482479	MIF/BCL2/TSC22D3/CD27/ZC3H8	5
BP	GO:0042594	response to starvation	7/220	211/18903	0.0119548802202135	0.0119548802202135	0.12066887482479	BCL2/ATF4/SESN3/ACAT1/ZFP36/SLC38A2/SIK1	7
BP	GO:0032509	endosome transport via multivesicular body sorting pathway	3/220	41/18903	0.0119755071695049	0.0119755071695049	0.12066887482479	VCP/SNF8/VPS25	3
BP	GO:0045292	mRNA cis splicing, via spliceosome	3/220	41/18903	0.0119755071695049	0.0119755071695049	0.12066887482479	WBP11/RNU11/NCBP2	3
BP	GO:0001503	ossification	11/220	429/18903	0.0120575719471139	0.0120575719471139	0.121045800248804	RPL38/BCL2/SRGN/ATF4/SIRT7/RSL1D1/EBP/REST/PSMC2/JUND/ALPL	11
BP	GO:0022613	ribonucleoprotein complex biogenesis	12/220	489/18903	0.012322716132019	0.012322716132019	0.123165191399656	RPL38/RPS28/RPS21/SIRT7/WDR74/RSL1D1/DDX3X/WBP11/EIF5/C1D/RNU11/HELQ	12
BP	GO:1902806	regulation of cell cycle G1/S phase transition	7/220	213/18903	0.0125397723863293	0.0125397723863293	0.123165191399656	BCL2/SMARCB1/DDX3X/RB1/ARID2/WEE1/CCND2	7
BP	GO:0043029	T cell homeostasis	3/220	42/18903	0.0127880072343968	0.0127880072343968	0.123165191399656	BCL2/TSC22D3/ZC3H8	3
BP	GO:0000722	telomere maintenance via recombination	2/220	15/18903	0.0128139630197933	0.0128139630197933	0.123165191399656	ERCC1/TERF2	2
BP	GO:0001325	formation of extrachromosomal circular DNA	2/220	15/18903	0.0128139630197933	0.0128139630197933	0.123165191399656	ERCC1/TERF2	2
BP	GO:0002903	negative regulation of B cell apoptotic process	2/220	15/18903	0.0128139630197933	0.0128139630197933	0.123165191399656	MIF/BCL2	2
BP	GO:0043328	protein transport to vacuole involved in ubiquitin-dependent protein catabolic process via the multivesicular body sorting pathway	2/220	15/18903	0.0128139630197933	0.0128139630197933	0.123165191399656	SNF8/VPS25	2
BP	GO:0070262	peptidyl-serine dephosphorylation	2/220	15/18903	0.0128139630197933	0.0128139630197933	0.123165191399656	PPP1R15A/DUSP1	2
BP	GO:0090656	t-circle formation	2/220	15/18903	0.0128139630197933	0.0128139630197933	0.123165191399656	ERCC1/TERF2	2
BP	GO:0090737	telomere maintenance via telomere trimming	2/220	15/18903	0.0128139630197933	0.0128139630197933	0.123165191399656	ERCC1/TERF2	2
BP	GO:1901836	regulation of transcription of nucleolar large rRNA by RNA polymerase I	2/220	15/18903	0.0128139630197933	0.0128139630197933	0.123165191399656	SMARCB1/SIRT7	2
BP	GO:1902166	negative regulation of intrinsic apoptotic signaling pathway in response to DNA damage by p53 class mediator	2/220	15/18903	0.0128139630197933	0.0128139630197933	0.123165191399656	MIF/BCL2	2
BP	GO:0043154	negative regulation of cysteine-type endopeptidase activity involved in apoptotic process	4/220	78/18903	0.0130243989260013	0.0130243989260013	0.124557207468517	CD27/DDX3X/SERPINB9/CSNK2A1	4
BP	GO:0006979	response to oxidative stress	11/220	434/18903	0.0130506930388372	0.0130506930388372	0.124557207468517	BCL2/ATF4/HBB/CHD6/SESN3/ERCC1/TP53INP1/REST/NONO/TXN/HBA2	11
BP	GO:0007179	transforming growth factor beta receptor signaling pathway	7/220	216/18903	0.0134554067042346	0.0134554067042346	0.127407045518524	STAT3/HIPK2/SKIL/EP300/CREBBP/MAP3K7/NRROS	7
BP	GO:0016571	histone methylation	6/220	167/18903	0.013592511895979	0.013592511895979	0.127407045518524	EHMT1/SMARCB1/SIRT7/PHF20/SETBP1/CREBBP	6
BP	GO:0006356	regulation of transcription by RNA polymerase I	3/220	43/18903	0.0136313169088751	0.0136313169088751	0.127407045518524	ATF4/SMARCB1/SIRT7	3
BP	GO:0042789	mRNA transcription by RNA polymerase II	3/220	43/18903	0.0136313169088751	0.0136313169088751	0.127407045518524	ATF4/STAT3/NCBP2	3
BP	GO:0071459	protein localization to chromosome, centromeric region	3/220	43/18903	0.0136313169088751	0.0136313169088751	0.127407045518524	IK/RB1/RCC2	3
BP	GO:0071548	response to dexamethasone	3/220	43/18903	0.0136313169088751	0.0136313169088751	0.127407045518524	CFLAR/DDIT4/EIF4E	3
BP	GO:0046034	ATP metabolic process	7/220	217/18903	0.0137710150939746	0.0137710150939746	0.12827044263695	STAT3/DDIT4/SDHB/VCP/NDUFA5/SDHD/EP300	7
BP	GO:1901215	negative regulation of neuron death	7/220	218/18903	0.0140918982376152	0.0140918982376152	0.128734934208319	BCL2/ATF4/KRAS/HIPK2/REST/GRN/NONO	7
BP	GO:0008286	insulin receptor signaling pathway	5/220	122/18903	0.0141075011742906	0.0141075011742906	0.128734934208319	SESN3/PTPN2/PHIP/AKT2/ADIPOR1	5
BP	GO:1903201	regulation of oxidative stress-induced cell death	4/220	80/18903	0.0141854766335822	0.0141854766335822	0.128734934208319	ATF4/REST/NONO/TXN	4
BP	GO:0071560	cellular response to transforming growth factor beta stimulus	8/220	271/18903	0.0142956469314862	0.0142956469314862	0.128734934208319	CFLAR/STAT3/HIPK2/SKIL/EP300/CREBBP/MAP3K7/NRROS	8
BP	GO:0002262	myeloid cell homeostasis	6/220	169/18903	0.0143413092222049	0.0143413092222049	0.128734934208319	STAT3/HIPK2/HMGB2/PTPN2/RB1/ZFP36	6
BP	GO:0021762	substantia nigra development	3/220	44/18903	0.0145055873447387	0.0145055873447387	0.128734934208319	YWHAH/MBP/SEC16A	3
BP	GO:0072538	T-helper 17 type immune response	3/220	44/18903	0.0145055873447387	0.0145055873447387	0.128734934208319	STAT3/ARID5A/LY9	3
BP	GO:0090317	negative regulation of intracellular protein transport	3/220	44/18903	0.0145055873447387	0.0145055873447387	0.128734934208319	MDFIC/SVIP/TXN	3
BP	GO:1903573	negative regulation of response to endoplasmic reticulum stress	3/220	44/18903	0.0145055873447387	0.0145055873447387	0.128734934208319	HERPUD1/PPP1R15A/SVIP	3
BP	GO:0015671	oxygen transport	2/220	16/18903	0.0145332991745081	0.0145332991745081	0.128734934208319	HBB/HBA2	2
BP	GO:0034393	positive regulation of smooth muscle cell apoptotic process	2/220	16/18903	0.0145332991745081	0.0145332991745081	0.128734934208319	ATF4/PDCD4	2
BP	GO:0045838	positive regulation of membrane potential	2/220	16/18903	0.0145332991745081	0.0145332991745081	0.128734934208319	VCP/AKT2	2
BP	GO:0071391	cellular response to estrogen stimulus	2/220	16/18903	0.0145332991745081	0.0145332991745081	0.128734934208319	ARID5A/SERPINB9	2
BP	GO:0099170	postsynaptic modulation of chemical synaptic transmission	2/220	16/18903	0.0145332991745081	0.0145332991745081	0.128734934208319	RNF19A/EIF4E	2
BP	GO:1900044	regulation of protein K63-linked ubiquitination	2/220	16/18903	0.0145332991745081	0.0145332991745081	0.128734934208319	DDX3X/UBE2V1	2
BP	GO:0043543	protein acylation	8/220	272/18903	0.0145863703583983	0.0145863703583983	0.128784171688242	SMARCB1/DDX3X/ARID5A/PHF20/NMT1/EP300/CREBBP/MAP3K7	8
BP	GO:2000058	regulation of ubiquitin-dependent protein catabolic process	6/220	170/18903	0.0147262862213595	0.0147262862213595	0.129597358236503	RNF19A/HERPUD1/HIPK2/VCP/SVIP/CSNK2A1	6
BP	GO:1905897	regulation of response to endoplasmic reticulum stress	4/220	82/18903	0.0154101907142474	0.0154101907142474	0.133613209188471	HERPUD1/PPP1R15A/PTPN2/SVIP	4
BP	GO:2001021	negative regulation of response to DNA damage stimulus	4/220	82/18903	0.0154101907142474	0.0154101907142474	0.133613209188471	MIF/BCL2/ERCC1/TERF2	4
BP	GO:0043620	regulation of DNA-templated transcription in response to stress	3/220	45/18903	0.0154109509282194	0.0154109509282194	0.133613209188471	ATF4/CHD6/VHL	3
BP	GO:0060964	regulation of miRNA-mediated gene silencing	3/220	45/18903	0.0154109509282194	0.0154109509282194	0.133613209188471	NEAT1/STAT3/ZFP36	3
BP	GO:0071222	cellular response to lipopolysaccharide	7/220	222/18903	0.0154290826222105	0.0154290826222105	0.133613209188471	MIF/ARID5A/HMGB2/TNIP2/ZFP36/HADHB/PDCD4	7
BP	GO:0007254	JNK cascade	6/220	172/18903	0.0155177059719926	0.0155177059719926	0.133868241951429	CD27/HIPK2/MDFIC/TRAF3/MAP3K7/PDCD4	6
BP	GO:0051348	negative regulation of transferase activity	8/220	276/18903	0.0157924431446679	0.0157924431446679	0.133868241951429	RPS20/MIDN/PTPN2/RB1/ZFP36/DUSP1/VPS25/PDCD4	8
BP	GO:0072331	signal transduction by p53 class mediator	6/220	173/18903	0.0159242705613554	0.0159242705613554	0.133868241951429	MIF/BCL2/RPS20/HIPK2/DDIT4/EP300	6
BP	GO:0006310	DNA recombination	9/220	332/18903	0.0160473947626643	0.0160473947626643	0.133868241951429	REV3L/HMGB2/ERCC1/ARID2/SMARCAD1/NONO/HELQ/TERF2/NDFIP1	9
BP	GO:0018209	peptidyl-serine modification	9/220	332/18903	0.0160473947626643	0.0160473947626643	0.133868241951429	MIF/BCL2/HIPK2/DDIT4/TOP1/CSNK2A1/AKT2/PKN2/TXN	9
BP	GO:0071559	response to transforming growth factor beta	8/220	277/18903	0.0161049249966768	0.0161049249966768	0.133868241951429	CFLAR/STAT3/HIPK2/SKIL/EP300/CREBBP/MAP3K7/NRROS	8
BP	GO:0015980	energy derivation by oxidation of organic compounds	9/220	333/18903	0.0163321994945266	0.0163321994945266	0.133868241951429	PPP1R2/SDHB/VCP/NDUFA5/PHKB/SDHD/MDH2/AKT2/SURF1	9
BP	GO:0010950	positive regulation of endopeptidase activity	6/220	174/18903	0.0163381518248743	0.0163381518248743	0.133868241951429	CFLAR/STAT3/DDX3X/VCP/REST/MBP	6
BP	GO:0046631	alpha-beta T cell activation	6/220	174/18903	0.0163381518248743	0.0163381518248743	0.133868241951429	BCL2/GPR183/STAT3/LY9/DOCK2/NDFIP1	6
BP	GO:0036005	response to macrophage colony-stimulating factor	2/220	17/18903	0.016346089583283	0.016346089583283	0.133868241951429	PTPN2/ALPL	2
BP	GO:0043923	positive regulation by host of viral transcription	2/220	17/18903	0.016346089583283	0.016346089583283	0.133868241951429	SMARCB1/EP300	2
BP	GO:1900034	regulation of cellular response to heat	2/220	17/18903	0.016346089583283	0.016346089583283	0.133868241951429	EP300/CREBBP	2
BP	GO:1902165	regulation of intrinsic apoptotic signaling pathway in response to DNA damage by p53 class mediator	2/220	17/18903	0.016346089583283	0.016346089583283	0.133868241951429	MIF/BCL2	2
BP	GO:1902916	positive regulation of protein polyubiquitination	2/220	17/18903	0.016346089583283	0.016346089583283	0.133868241951429	DDX3X/UBE2V1	2
BP	GO:1904683	regulation of metalloendopeptidase activity	2/220	17/18903	0.016346089583283	0.016346089583283	0.133868241951429	STAT3/MBP	2
BP	GO:1905288	vascular associated smooth muscle cell apoptotic process	2/220	17/18903	0.016346089583283	0.016346089583283	0.133868241951429	ATF4/PDCD4	2
BP	GO:1905459	regulation of vascular associated smooth muscle cell apoptotic process	2/220	17/18903	0.016346089583283	0.016346089583283	0.133868241951429	ATF4/PDCD4	2
BP	GO:0010830	regulation of myotube differentiation	3/220	46/18903	0.0163475218181075	0.0163475218181075	0.133868241951429	BCL2/BHLHE41/SIK1	3
BP	GO:0008589	regulation of smoothened signaling pathway	4/220	84/18903	0.0166995741912723	0.0166995741912723	0.13633926297567	PTCH2/VCP/RB1/CREBBP	4
BP	GO:0044843	cell cycle G1/S phase transition	8/220	280/18903	0.0170692186093977	0.0170692186093977	0.138040699433227	BCL2/SMARCB1/DDX3X/EIF4E/RB1/ARID2/WEE1/CCND2	8
BP	GO:0032386	regulation of intracellular transport	9/220	336/18903	0.0172088875847221	0.0172088875847221	0.138040699433227	SIRT7/NMT1/MDFIC/SVIP/ARHGAP1/AKT2/LAMP1/NCBP2/TXN	9
BP	GO:1903050	regulation of proteolysis involved in protein catabolic process	7/220	227/18903	0.0172246153268512	0.0172246153268512	0.138040699433227	RNF19A/HERPUD1/HIPK2/VCP/SVIP/CSNK2A1/PSMC2	7
BP	GO:0006110	regulation of glycolytic process	3/220	47/18903	0.0173153964725951	0.0173153964725951	0.138040699433227	STAT3/DDIT4/EP300	3
BP	GO:0045646	regulation of erythrocyte differentiation	3/220	47/18903	0.0173153964725951	0.0173153964725951	0.138040699433227	STAT3/HMGB2/ZFP36	3
BP	GO:0046677	response to antibiotic	3/220	47/18903	0.0173153964725951	0.0173153964725951	0.138040699433227	CRIP1/ZC3H8/ALPL	3
BP	GO:1900368	regulation of post-transcriptional gene silencing by RNA	3/220	47/18903	0.0173153964725951	0.0173153964725951	0.138040699433227	NEAT1/STAT3/ZFP36	3
BP	GO:1902459	positive regulation of stem cell population maintenance	3/220	47/18903	0.0173153964725951	0.0173153964725951	0.138040699433227	BRD9/SMARCB1/REST	3
BP	GO:1901987	regulation of cell cycle phase transition	11/220	453/18903	0.0174002112096522	0.0174002112096522	0.138310059777294	BCL2/SMARCB1/IK/DDX3X/XPC/RB1/RCC2/ARID2/WEE1/DUSP1/CCND2	11
BP	GO:0014902	myotube differentiation	5/220	129/18903	0.0175608562189681	0.0175608562189681	0.139178838916106	BCL2/CFLAR/DOCK2/BHLHE41/SIK1	5
BP	GO:0033077	T cell differentiation in thymus	4/220	86/18903	0.0180545871978654	0.0180545871978654	0.13983761148994	BCL2/PTPN2/ZC3H8/DOCK2	4
BP	GO:0002295	T-helper cell lineage commitment	2/220	18/18903	0.0182499466499168	0.0182499466499168	0.13983761148994	STAT3/LY9	2
BP	GO:0006474	N-terminal protein amino acid acetylation	2/220	18/18903	0.0182499466499168	0.0182499466499168	0.13983761148994	EP300/CREBBP	2
BP	GO:0033033	negative regulation of myeloid cell apoptotic process	2/220	18/18903	0.0182499466499168	0.0182499466499168	0.13983761148994	MIF/BCL2	2
BP	GO:0034501	protein localization to kinetochore	2/220	18/18903	0.0182499466499168	0.0182499466499168	0.13983761148994	IK/RCC2	2
BP	GO:0044320	cellular response to leptin stimulus	2/220	18/18903	0.0182499466499168	0.0182499466499168	0.13983761148994	STAT3/ADIPOR1	2
BP	GO:0045721	negative regulation of gluconeogenesis	2/220	18/18903	0.0182499466499168	0.0182499466499168	0.13983761148994	EP300/SIK1	2
BP	GO:0072567	chemokine (C-X-C motif) ligand 2 production	2/220	18/18903	0.0182499466499168	0.0182499466499168	0.13983761148994	MIF/MBP	2
BP	GO:1903083	protein localization to condensed chromosome	2/220	18/18903	0.0182499466499168	0.0182499466499168	0.13983761148994	IK/RCC2	2
BP	GO:2000341	regulation of chemokine (C-X-C motif) ligand 2 production	2/220	18/18903	0.0182499466499168	0.0182499466499168	0.13983761148994	MIF/MBP	2
BP	GO:0009299	mRNA transcription	3/220	48/18903	0.0183146541650417	0.0183146541650417	0.13983761148994	ATF4/STAT3/NCBP2	3
BP	GO:0060147	regulation of post-transcriptional gene silencing	3/220	48/18903	0.0183146541650417	0.0183146541650417	0.13983761148994	NEAT1/STAT3/ZFP36	3
BP	GO:0071985	multivesicular body sorting pathway	3/220	48/18903	0.0183146541650417	0.0183146541650417	0.13983761148994	VCP/SNF8/VPS25	3
BP	GO:0006473	protein acetylation	7/220	230/18903	0.0183701856791641	0.0183701856791641	0.139867617160992	SMARCB1/DDX3X/ARID5A/PHF20/EP300/CREBBP/MAP3K7	7
BP	GO:0030433	ubiquitin-dependent ERAD pathway	4/220	87/18903	0.0187569848868121	0.0187569848868121	0.14241260823689	HERPUD1/VCP/SVIP/DNAJB14	4
BP	GO:0016573	histone acetylation	6/220	180/18903	0.0189783677590697	0.0189783677590697	0.14369096436226	SMARCB1/ARID5A/PHF20/EP300/CREBBP/MAP3K7	6
BP	GO:0034198	cellular response to amino acid starvation	3/220	49/18903	0.01934535748886	0.01934535748886	0.146061561453788	ATF4/SESN3/SLC38A2	3
BP	GO:0000018	regulation of DNA recombination	5/220	133/18903	0.019765185706778	0.019765185706778	0.148298147574938	ARID2/SMARCAD1/HELQ/TERF2/NDFIP1	5
BP	GO:0002244	hematopoietic progenitor cell differentiation	5/220	133/18903	0.019765185706778	0.019765185706778	0.148298147574938	BCL2/TNFRSF13B/CHD2/REST/ZFP36	5
BP	GO:0007249	I-kappaB kinase/NF-kappaB signaling	8/220	288/18903	0.0198433299380626	0.0198433299380626	0.148298147574938	CFLAR/SQSTM1/UBE2V1/REL/TNIP2/TRAF3/MAP3K7/NDFIP1	8
BP	GO:0071219	cellular response to molecule of bacterial origin	7/220	234/18903	0.0199796057161228	0.0199796057161228	0.148298147574938	MIF/ARID5A/HMGB2/TNIP2/ZFP36/HADHB/PDCD4	7
BP	GO:0062197	cellular response to chemical stress	9/220	345/18903	0.0200454868780371	0.0200454868780371	0.148298147574938	BCL2/ATF4/CHD6/DDX3X/TP53INP1/REST/NONO/AKR1B1/TXN	9
BP	GO:0000028	ribosomal small subunit assembly	2/220	19/18903	0.0202425252527026	0.0202425252527026	0.148298147574938	RPL38/RPS28	2
BP	GO:0006337	nucleosome disassembly	2/220	19/18903	0.0202425252527026	0.0202425252527026	0.148298147574938	SMARCB1/ARID2	2
BP	GO:0036003	positive regulation of transcription from RNA polymerase II promoter in response to stress	2/220	19/18903	0.0202425252527026	0.0202425252527026	0.148298147574938	ATF4/CHD6	2
BP	GO:0097284	hepatocyte apoptotic process	2/220	19/18903	0.0202425252527026	0.0202425252527026	0.148298147574938	CFLAR/RB1	2
BP	GO:0043467	regulation of generation of precursor metabolites and energy	5/220	134/18903	0.0203433052877051	0.0203433052877051	0.148298147574938	STAT3/DDIT4/VCP/EP300/AKT2	5
BP	GO:0032103	positive regulation of response to external stimulus	11/220	464/18903	0.0203690653405929	0.0203690653405929	0.148298147574938	MIF/NEAT1/HMGB2/EP300/CREBBP/PQBP1/GRN/MAP3K7/NONO/LAMP1/PDCD4	11
BP	GO:2000116	regulation of cysteine-type endopeptidase activity	7/220	235/18903	0.0203968767255945	0.0203968767255945	0.148298147574938	CFLAR/CD27/DDX3X/VCP/REST/SERPINB9/CSNK2A1	7
BP	GO:0060966	regulation of gene silencing by RNA	3/220	50/18903	0.0204075528517201	0.0204075528517201	0.148298147574938	NEAT1/STAT3/ZFP36	3
BP	GO:2000059	negative regulation of ubiquitin-dependent protein catabolic process	3/220	50/18903	0.0204075528517201	0.0204075528517201	0.148298147574938	HIPK2/SVIP/CSNK2A1	3
BP	GO:0030099	myeloid cell differentiation	10/220	407/18903	0.0212341123141083	0.0212341123141083	0.153892032673315	GPR183/STAT3/HIPK2/HMGB2/PTPN2/RB1/EP300/ZFP36/NRROS/NDFIP1	10
BP	GO:0030225	macrophage differentiation	3/220	51/18903	0.0215012709592637	0.0215012709592637	0.154588224822292	PTPN2/RB1/NRROS	3
BP	GO:1901985	positive regulation of protein acetylation	3/220	51/18903	0.0215012709592637	0.0215012709592637	0.154588224822292	SMARCB1/DDX3X/ARID5A	3
BP	GO:1990928	response to amino acid starvation	3/220	51/18903	0.0215012709592637	0.0215012709592637	0.154588224822292	ATF4/SESN3/SLC38A2	3
BP	GO:0002366	leukocyte activation involved in immune response	8/220	293/18903	0.0217323994059728	0.0217323994059728	0.155034207245902	GPR183/STAT3/ERCC1/LY9/DOCK2/GRN/LAMP1/NDFIP1	8
BP	GO:1901216	positive regulation of neuron death	4/220	91/18903	0.0217348927439886	0.0217348927439886	0.155034207245902	ATF4/DDIT4/REST/GRN	4
BP	GO:2000117	negative regulation of cysteine-type endopeptidase activity	4/220	91/18903	0.0217348927439886	0.0217348927439886	0.155034207245902	CD27/DDX3X/SERPINB9/CSNK2A1	4
BP	GO:0018393	internal peptidyl-lysine acetylation	6/220	186/18903	0.0218963637355174	0.0218963637355174	0.155776037074064	SMARCB1/ARID5A/PHF20/EP300/CREBBP/MAP3K7	6
BP	GO:0006700	C21-steroid hormone biosynthetic process	2/220	20/18903	0.0223215220865666	0.0223215220865666	0.157560086000298	REST/AKR1B1	2
BP	GO:1903579	negative regulation of ATP metabolic process	2/220	20/18903	0.0223215220865666	0.0223215220865666	0.157560086000298	STAT3/DDIT4	2
BP	GO:1904292	regulation of ERAD pathway	2/220	20/18903	0.0223215220865666	0.0223215220865666	0.157560086000298	HERPUD1/SVIP	2
BP	GO:0006475	internal protein amino acid acetylation	6/220	188/18903	0.0229327540022011	0.0229327540022011	0.16145411225063	SMARCB1/ARID5A/PHF20/EP300/CREBBP/MAP3K7	6
BP	GO:1903706	regulation of hemopoiesis	10/220	413/18903	0.0232063486039951	0.0232063486039951	0.16283461441098	STAT3/CD27/SMARCB1/HMGB2/PTPN2/RB1/ZC3H8/ARID2/ZFP36/NDFIP1	10
BP	GO:0002263	cell activation involved in immune response	8/220	297/18903	0.0233328083768985	0.0233328083768985	0.16283461441098	GPR183/STAT3/ERCC1/LY9/DOCK2/GRN/LAMP1/NDFIP1	8
BP	GO:0016570	histone modification	11/220	474/18903	0.0233792005745216	0.0233792005745216	0.16283461441098	EHMT1/SMARCB1/SIRT7/ARID5A/PHF20/REST/SETBP1/EP300/CREBBP/SMARCAD1/MAP3K7	11
BP	GO:0043123	positive regulation of I-kappaB kinase/NF-kappaB signaling	6/220	189/18903	0.023463125498825	0.023463125498825	0.16283461441098	CFLAR/UBE2V1/REL/TNIP2/MAP3K7/NDFIP1	6
BP	GO:0009205	purine ribonucleoside triphosphate metabolic process	7/220	242/18903	0.0234892883584305	0.0234892883584305	0.16283461441098	STAT3/DDIT4/SDHB/VCP/NDUFA5/SDHD/EP300	7
BP	GO:0065004	protein-DNA complex assembly	7/220	242/18903	0.0234892883584305	0.0234892883584305	0.16283461441098	SMARCB1/BRD2/HMGB2/BDP1/RSF1/RB1/TSPYL2	7
BP	GO:1900542	regulation of purine nucleotide metabolic process	4/220	94/18903	0.0241475914318167	0.0241475914318167	0.166331719199951	STAT3/DDIT4/VCP/EP300	4
BP	GO:0016311	dephosphorylation	9/220	357/18903	0.0243350076476588	0.0243350076476588	0.166331719199951	BCL2/PPP1R2/DUSP2/PPP1R15A/PTPN2/CAMTA1/DUSP1/ALPL/FBXW11	9
BP	GO:0002089	lens morphogenesis in camera-type eye	2/220	21/18903	0.0244846750146568	0.0244846750146568	0.166331719199951	ATF4/HIPK2	2
BP	GO:0032986	protein-DNA complex disassembly	2/220	21/18903	0.0244846750146568	0.0244846750146568	0.166331719199951	SMARCB1/ARID2	2
BP	GO:0042790	nucleolar large rRNA transcription by RNA polymerase I	2/220	21/18903	0.0244846750146568	0.0244846750146568	0.166331719199951	SMARCB1/SIRT7	2
BP	GO:0043373	CD4-positive, alpha-beta T cell lineage commitment	2/220	21/18903	0.0244846750146568	0.0244846750146568	0.166331719199951	STAT3/LY9	2
BP	GO:0043555	regulation of translation in response to stress	2/220	21/18903	0.0244846750146568	0.0244846750146568	0.166331719199951	DDX3X/PPP1R15A	2
BP	GO:0071731	response to nitric oxide	2/220	21/18903	0.0244846750146568	0.0244846750146568	0.166331719199951	CFLAR/TXN	2
BP	GO:0046328	regulation of JNK cascade	5/220	141/18903	0.0247009234204869	0.0247009234204869	0.167381257388826	CD27/HIPK2/MDFIC/TRAF3/PDCD4	5
BP	GO:1900407	regulation of cellular response to oxidative stress	4/220	95/18903	0.0249863996019751	0.0249863996019751	0.168893500393978	ATF4/REST/NONO/TXN	4
BP	GO:0001649	osteoblast differentiation	7/220	246/18903	0.0253945043266405	0.0253945043266405	0.171225055357683	ATF4/SIRT7/RSL1D1/REST/PSMC2/JUND/ALPL	7
BP	GO:0009144	purine nucleoside triphosphate metabolic process	7/220	247/18903	0.0258868727694407	0.0258868727694407	0.17349197928327	STAT3/DDIT4/SDHB/VCP/NDUFA5/SDHD/EP300	7
BP	GO:0016197	endosomal transport	7/220	247/18903	0.0258868727694407	0.0258868727694407	0.17349197928327	SQSTM1/SNX9/VCP/SNF8/RAB8A/ARHGAP1/VPS25	7
BP	GO:0002931	response to ischemia	3/220	55/18903	0.0261914616077082	0.0261914616077082	0.17349197928327	BCL2/SQSTM1/REST	3
BP	GO:2000772	regulation of cellular senescence	3/220	55/18903	0.0261914616077082	0.0261914616077082	0.17349197928327	MIF/RSL1D1/TERF2	3
BP	GO:0009060	aerobic respiration	6/220	194/18903	0.0262386623942016	0.0262386623942016	0.17349197928327	SDHB/VCP/NDUFA5/SDHD/MDH2/SURF1	6
BP	GO:2001251	negative regulation of chromosome organization	4/220	97/18903	0.0267162949073918	0.0267162949073918	0.17349197928327	IK/ERCC1/DUSP1/TERF2	4
BP	GO:0000729	DNA double-strand break processing	2/220	22/18903	0.0267297624292512	0.0267297624292512	0.17349197928327	SMARCAD1/HELQ	2
BP	GO:0002902	regulation of B cell apoptotic process	2/220	22/18903	0.0267297624292512	0.0267297624292512	0.17349197928327	MIF/BCL2	2
BP	GO:0015669	gas transport	2/220	22/18903	0.0267297624292512	0.0267297624292512	0.17349197928327	HBB/HBA2	2
BP	GO:0032069	regulation of nuclease activity	2/220	22/18903	0.0267297624292512	0.0267297624292512	0.17349197928327	HMGB2/TERF2	2
BP	GO:0032785	negative regulation of DNA-templated transcription, elongation	2/220	22/18903	0.0267297624292512	0.0267297624292512	0.17349197928327	VHL/SUPT5H	2
BP	GO:0044321	response to leptin	2/220	22/18903	0.0267297624292512	0.0267297624292512	0.17349197928327	STAT3/ADIPOR1	2
BP	GO:0045061	thymic T cell selection	2/220	22/18903	0.0267297624292512	0.0267297624292512	0.17349197928327	PTPN2/DOCK2	2
BP	GO:1902644	tertiary alcohol metabolic process	2/220	22/18903	0.0267297624292512	0.0267297624292512	0.17349197928327	REST/AKR1B1	2
BP	GO:0007224	smoothened signaling pathway	5/220	144/18903	0.0267385249166252	0.0267385249166252	0.17349197928327	PTCH2/HIPK2/VCP/RB1/CREBBP	5
BP	GO:0051056	regulation of small GTPase mediated signal transduction	8/220	305/18903	0.0267794407660816	0.0267794407660816	0.17349197928327	SQSTM1/KRAS/ARHGDIA/ARHGEF1/DOCK2/FAM13B/CYTH1/ARHGAP1	8
BP	GO:0032872	regulation of stress-activated MAPK cascade	6/220	195/18903	0.0268188280985264	0.0268188280985264	0.17349197928327	CD27/HIPK2/MDFIC/TRAF3/DUSP1/PDCD4	6
BP	GO:0009199	ribonucleoside triphosphate metabolic process	7/220	249/18903	0.0268911344093816	0.0268911344093816	0.17354554161443	STAT3/DDIT4/SDHB/VCP/NDUFA5/SDHD/EP300	7
BP	GO:0009636	response to toxic substance	7/220	250/18903	0.027403096497803	0.027403096497803	0.175849316543024	BCL2/ATF4/HBB/TP53INP1/MBP/TXN/HBA2	7
BP	GO:0006352	DNA-templated transcription initiation	5/220	145/18903	0.0274408356252341	0.0274408356252341	0.175849316543024	SMARCB1/POLR2I/ERCC1/BDP1/RSF1	5
BP	GO:0043470	regulation of carbohydrate catabolic process	3/220	56/18903	0.0274427370302191	0.0274427370302191	0.175849316543024	STAT3/DDIT4/EP300	3
BP	GO:0018394	peptidyl-lysine acetylation	6/220	197/18903	0.0280045713756071	0.0280045713756071	0.177772607226526	SMARCB1/ARID5A/PHF20/EP300/CREBBP/MAP3K7	6
BP	GO:0033044	regulation of chromosome organization	7/220	252/18903	0.0284468519871341	0.0284468519871341	0.177772607226526	SMARCB1/IK/ERCC1/RB1/ARID2/DUSP1/TERF2	7
BP	GO:0006140	regulation of nucleotide metabolic process	4/220	99/18903	0.0285162993291756	0.0285162993291756	0.177772607226526	STAT3/DDIT4/VCP/EP300	4
BP	GO:0002695	negative regulation of leukocyte activation	6/220	198/18903	0.0286102335267788	0.0286102335267788	0.177772607226526	TNFRSF13B/SAMSN1/PTPN2/ZC3H8/GRN/NDFIP1	6
BP	GO:0070302	regulation of stress-activated protein kinase signaling cascade	6/220	198/18903	0.0286102335267788	0.0286102335267788	0.177772607226526	CD27/HIPK2/MDFIC/TRAF3/DUSP1/PDCD4	6
BP	GO:1903311	regulation of mRNA metabolic process	8/220	309/18903	0.0286292971185885	0.0286292971185885	0.177772607226526	CNOT6L/TRA2B/REST/RBM23/ZFP36/SON/NCBP2/NSRP1	8
BP	GO:0035196	miRNA processing	3/220	57/18903	0.0287254155022789	0.0287254155022789	0.177772607226526	STAT3/DDX3X/NCBP2	3
BP	GO:0038066	p38MAPK cascade	3/220	57/18903	0.0287254155022789	0.0287254155022789	0.177772607226526	ZFP36/MAP3K7/DUSP1	3
BP	GO:0048168	regulation of neuronal synaptic plasticity	3/220	57/18903	0.0287254155022789	0.0287254155022789	0.177772607226526	KRAS/RAB8A/SYNGR1	3
BP	GO:0070534	protein K63-linked ubiquitination	3/220	57/18903	0.0287254155022789	0.0287254155022789	0.177772607226526	DDX3X/UBE2V1/TRAF3	3
BP	GO:0017015	regulation of transforming growth factor beta receptor signaling pathway	5/220	147/18903	0.0288804455565551	0.0288804455565551	0.177772607226526	HIPK2/SKIL/EP300/CREBBP/NRROS	5
BP	GO:0106106	cold-induced thermogenesis	5/220	147/18903	0.0288804455565551	0.0288804455565551	0.177772607226526	ATF4/EHMT1/RB1/ADIPOR1/ALPL	5
BP	GO:0120161	regulation of cold-induced thermogenesis	5/220	147/18903	0.0288804455565551	0.0288804455565551	0.177772607226526	ATF4/EHMT1/RB1/ADIPOR1/ALPL	5
BP	GO:0002689	negative regulation of leukocyte chemotaxis	2/220	23/18903	0.0290546026218576	0.0290546026218576	0.177772607226526	MIF/DUSP1	2
BP	GO:0046823	negative regulation of nucleocytoplasmic transport	2/220	23/18903	0.0290546026218576	0.0290546026218576	0.177772607226526	MDFIC/TXN	2
BP	GO:0060965	negative regulation of miRNA-mediated gene silencing	2/220	23/18903	0.0290546026218576	0.0290546026218576	0.177772607226526	NEAT1/STAT3	2
BP	GO:0071218	cellular response to misfolded protein	2/220	23/18903	0.0290546026218576	0.0290546026218576	0.177772607226526	VCP/DNAJB14	2
BP	GO:0140747	regulation of ncRNA transcription	2/220	23/18903	0.0290546026218576	0.0290546026218576	0.177772607226526	SMARCB1/SIRT7	2
BP	GO:1900543	negative regulation of purine nucleotide metabolic process	2/220	23/18903	0.0290546026218576	0.0290546026218576	0.177772607226526	STAT3/DDIT4	2
BP	GO:1902254	negative regulation of intrinsic apoptotic signaling pathway by p53 class mediator	2/220	23/18903	0.0290546026218576	0.0290546026218576	0.177772607226526	MIF/BCL2	2
BP	GO:0098869	cellular oxidant detoxification	4/220	100/18903	0.0294427276370139	0.0294427276370139	0.179337725997187	HBB/TP53INP1/TXN/HBA2	4
BP	GO:1901992	positive regulation of mitotic cell cycle phase transition	4/220	100/18903	0.0294427276370139	0.0294427276370139	0.179337725997187	DDX3X/RB1/RCC2/CCND2	4
BP	GO:0050732	negative regulation of peptidyl-tyrosine phosphorylation	3/220	58/18903	0.0300394305173697	0.0300394305173697	0.182562033472332	SAMSN1/PTPN2/VPS25	3
BP	GO:0009062	fatty acid catabolic process	4/220	101/18903	0.0303868368495595	0.0303868368495595	0.184260225803876	ACAT1/PHYH/AKT2/HADHB	4
BP	GO:1901653	cellular response to peptide	9/220	373/18903	0.0310225773660809	0.0310225773660809	0.187695340032092	CFLAR/STAT3/SESN3/PTPN2/RAB8A/RB1/PHIP/AKT2/ADIPOR1	9
BP	GO:0060149	negative regulation of post-transcriptional gene silencing	2/220	24/18903	0.0314570531623807	0.0314570531623807	0.188639757552702	NEAT1/STAT3	2
BP	GO:0060967	negative regulation of gene silencing by RNA	2/220	24/18903	0.0314570531623807	0.0314570531623807	0.188639757552702	NEAT1/STAT3	2
BP	GO:1900369	negative regulation of post-transcriptional gene silencing by RNA	2/220	24/18903	0.0314570531623807	0.0314570531623807	0.188639757552702	NEAT1/STAT3	2
BP	GO:2000637	positive regulation of miRNA-mediated gene silencing	2/220	24/18903	0.0314570531623807	0.0314570531623807	0.188639757552702	STAT3/ZFP36	2
BP	GO:1903828	negative regulation of protein localization	6/220	203/18903	0.0317680631192417	0.0317680631192417	0.190084262883809	MIDN/REST/MDFIC/SVIP/TXN/NDFIP1	6
BP	GO:1901654	response to ketone	6/220	205/18903	0.0330923491444388	0.0330923491444388	0.19612310961647	CFLAR/GNB1/DDIT4/EIF4E/MBP/FOSB	6
BP	GO:0071216	cellular response to biotic stimulus	7/220	261/18903	0.0334773223163316	0.0334773223163316	0.19612310961647	MIF/ARID5A/HMGB2/TNIP2/ZFP36/HADHB/PDCD4	7
BP	GO:0019058	viral life cycle	8/220	319/18903	0.0336366803378164	0.0336366803378164	0.19612310961647	BCL2/SMARCB1/DDX3X/VCP/SNF8/LAMP1/PKN2/ATG16L2	8
BP	GO:0045936	negative regulation of phosphate metabolic process	10/220	440/18903	0.0337447183131825	0.0337447183131825	0.19612310961647	STAT3/MIDN/DDIT4/PPP1R15A/SAMSN1/PTPN2/RB1/DUSP1/VPS25/PDCD4	10
BP	GO:0008211	glucocorticoid metabolic process	2/220	25/18903	0.0339350102872303	0.0339350102872303	0.19612310961647	YWHAH/REST	2
BP	GO:0019755	one-carbon compound transport	2/220	25/18903	0.0339350102872303	0.0339350102872303	0.19612310961647	HBB/HBA2	2
BP	GO:0019985	translesion synthesis	2/220	25/18903	0.0339350102872303	0.0339350102872303	0.19612310961647	REV3L/VCP	2
BP	GO:0032469	endoplasmic reticulum calcium ion homeostasis	2/220	25/18903	0.0339350102872303	0.0339350102872303	0.19612310961647	BCL2/HERPUD1	2
BP	GO:0033617	mitochondrial cytochrome c oxidase assembly	2/220	25/18903	0.0339350102872303	0.0339350102872303	0.19612310961647	PET100/SURF1	2
BP	GO:0045649	regulation of macrophage differentiation	2/220	25/18903	0.0339350102872303	0.0339350102872303	0.19612310961647	PTPN2/RB1	2
BP	GO:0045980	negative regulation of nucleotide metabolic process	2/220	25/18903	0.0339350102872303	0.0339350102872303	0.19612310961647	STAT3/DDIT4	2
BP	GO:0051788	response to misfolded protein	2/220	25/18903	0.0339350102872303	0.0339350102872303	0.19612310961647	VCP/DNAJB14	2
BP	GO:0060148	positive regulation of post-transcriptional gene silencing	2/220	25/18903	0.0339350102872303	0.0339350102872303	0.19612310961647	STAT3/ZFP36	2
BP	GO:1900370	positive regulation of post-transcriptional gene silencing by RNA	2/220	25/18903	0.0339350102872303	0.0339350102872303	0.19612310961647	STAT3/ZFP36	2
BP	GO:2000209	regulation of anoikis	2/220	25/18903	0.0339350102872303	0.0339350102872303	0.19612310961647	BCL2/SIK1	2
BP	GO:2000679	positive regulation of transcription regulatory region DNA binding	2/220	25/18903	0.0339350102872303	0.0339350102872303	0.19612310961647	RB1/EP300	2
BP	GO:0042255	ribosome assembly	3/220	61/18903	0.0341686493154013	0.0341686493154013	0.196182948680719	RPL38/RPS28/DDX3X	3
BP	GO:0010563	negative regulation of phosphorus metabolic process	10/220	441/18903	0.0341902080816989	0.0341902080816989	0.196182948680719	STAT3/MIDN/DDIT4/PPP1R15A/SAMSN1/PTPN2/RB1/DUSP1/VPS25/PDCD4	10
BP	GO:0043524	negative regulation of neuron apoptotic process	5/220	154/18903	0.0342915103694098	0.0342915103694098	0.196182948680719	BCL2/KRAS/HIPK2/GRN/NONO	5
BP	GO:0051092	positive regulation of NF-kappaB transcription factor activity	5/220	154/18903	0.0342915103694098	0.0342915103694098	0.196182948680719	CFLAR/STAT3/UBE2V1/EP300/MAP3K7	5
BP	GO:1901655	cellular response to ketone	4/220	105/18903	0.0343408661376455	0.0343408661376455	0.196182948680719	CFLAR/GNB1/DDIT4/EIF4E	4
BP	GO:0002285	lymphocyte activation involved in immune response	6/220	207/18903	0.0344520114149209	0.0344520114149209	0.196182948680719	GPR183/STAT3/ERCC1/LY9/LAMP1/NDFIP1	6
BP	GO:0048167	regulation of synaptic plasticity	6/220	207/18903	0.0344520114149209	0.0344520114149209	0.196182948680719	SQSTM1/ATF4/KRAS/YWHAH/RAB8A/SYNGR1	6
BP	GO:0042326	negative regulation of phosphorylation	9/220	381/18903	0.0348068515136289	0.0348068515136289	0.197788023055488	STAT3/MIDN/DDIT4/SAMSN1/PTPN2/RB1/DUSP1/VPS25/PDCD4	9
BP	GO:0006479	protein methylation	6/220	208/18903	0.0351451927877019	0.0351451927877019	0.198876763934364	EHMT1/SMARCB1/SIRT7/PHF20/SETBP1/CREBBP	6
BP	GO:0008213	protein alkylation	6/220	208/18903	0.0351451927877019	0.0351451927877019	0.198876763934364	EHMT1/SMARCB1/SIRT7/PHF20/SETBP1/CREBBP	6
BP	GO:0006754	ATP biosynthetic process	4/220	106/18903	0.0353739309419949	0.0353739309419949	0.199754105648327	SDHB/VCP/NDUFA5/SDHD	4
BP	GO:0000381	regulation of alternative mRNA splicing, via spliceosome	3/220	62/18903	0.035607107592365	0.035607107592365	0.199821950638204	TRA2B/REST/NSRP1	3
BP	GO:0006360	transcription by RNA polymerase I	3/220	62/18903	0.035607107592365	0.035607107592365	0.199821950638204	ATF4/SMARCB1/SIRT7	3
BP	GO:0061951	establishment of protein localization to plasma membrane	3/220	62/18903	0.035607107592365	0.035607107592365	0.199821950638204	RILPL2/RAB8A/SEC16A	3
BP	GO:0002726	positive regulation of T cell cytokine production	2/220	26/18903	0.0364864082962496	0.0364864082962496	0.200999086097889	ARID5A/MAP3K7	2
BP	GO:0006312	mitotic recombination	2/220	26/18903	0.0364864082962496	0.0364864082962496	0.200999086097889	ERCC1/TERF2	2
BP	GO:0010259	multicellular organism aging	2/220	26/18903	0.0364864082962496	0.0364864082962496	0.200999086097889	ERCC1/ALPL	2
BP	GO:0051570	regulation of histone H3-K9 methylation	2/220	26/18903	0.0364864082962496	0.0364864082962496	0.200999086097889	EHMT1/SMARCB1	2
BP	GO:0070102	interleukin-6-mediated signaling pathway	2/220	26/18903	0.0364864082962496	0.0364864082962496	0.200999086097889	STAT3/PTPN2	2
BP	GO:1904353	regulation of telomere capping	2/220	26/18903	0.0364864082962496	0.0364864082962496	0.200999086097889	ERCC1/TERF2	2
BP	GO:1905048	regulation of metallopeptidase activity	2/220	26/18903	0.0364864082962496	0.0364864082962496	0.200999086097889	STAT3/MBP	2
BP	GO:2000773	negative regulation of cellular senescence	2/220	26/18903	0.0364864082962496	0.0364864082962496	0.200999086097889	MIF/TERF2	2
BP	GO:0051091	positive regulation of DNA-binding transcription factor activity	7/220	266/18903	0.0365134849007727	0.0365134849007727	0.200999086097889	CFLAR/STAT3/SMARCB1/HIPK2/UBE2V1/EP300/MAP3K7	7
BP	GO:0045619	regulation of lymphocyte differentiation	6/220	210/18903	0.0365584163005617	0.0365584163005617	0.200999086097889	CD27/SMARCB1/PTPN2/ZC3H8/ARID2/NDFIP1	6
BP	GO:1901214	regulation of neuron death	8/220	325/18903	0.0369114244373636	0.0369114244373636	0.202529124070341	BCL2/ATF4/KRAS/HIPK2/DDIT4/REST/GRN/NONO	8
BP	GO:0032481	positive regulation of type I interferon production	3/220	63/18903	0.0370763948833002	0.0370763948833002	0.202563200807661	DDX3X/HMGB2/PQBP1	3
BP	GO:0098781	ncRNA transcription	3/220	63/18903	0.0370763948833002	0.0370763948833002	0.202563200807661	SMARCB1/SIRT7/ZC3H8	3
BP	GO:0009141	nucleoside triphosphate metabolic process	7/220	267/18903	0.0371418311694512	0.0371418311694512	0.202563200807661	STAT3/DDIT4/SDHB/VCP/NDUFA5/SDHD/EP300	7
BP	GO:0002683	negative regulation of immune system process	10/220	449/18903	0.0379033627191754	0.0379033627191754	0.206301329532608	MIF/TSC22D3/TNFRSF13B/SAMSN1/PTPN2/SERPINB9/ZC3H8/GRN/DUSP1/NDFIP1	10
BP	GO:0006282	regulation of DNA repair	6/220	212/18903	0.0380076571432918	0.0380076571432918	0.20645441861402	SMARCB1/SIRT7/UBE2V1/ARID2/HELQ/TERF2	6
BP	GO:0002696	positive regulation of leukocyte activation	10/220	450/18903	0.038386396883276	0.038386396883276	0.207899124451656	MIF/TNFRSF13C/BCL2/GPR183/CD27/SMARCB1/TNIP2/ARID2/LAMP1/JUND	10
BP	GO:0006368	transcription elongation by RNA polymerase II promoter	4/220	109/18903	0.0385804258715432	0.0385804258715432	0.207899124451656	POLR2I/VHL/SUPT5H/NCBP2	4
BP	GO:0042116	macrophage activation	4/220	109/18903	0.0385804258715432	0.0385804258715432	0.207899124451656	MIF/TNIP2/GRN/JUND	4
BP	GO:0046822	regulation of nucleocytoplasmic transport	4/220	109/18903	0.0385804258715432	0.0385804258715432	0.207899124451656	SIRT7/MDFIC/NCBP2/TXN	4
BP	GO:0001783	B cell apoptotic process	2/220	27/18903	0.0391092189583411	0.0391092189583411	0.208264375592448	MIF/BCL2	2
BP	GO:0032511	late endosome to vacuole transport via multivesicular body sorting pathway	2/220	27/18903	0.0391092189583411	0.0391092189583411	0.208264375592448	SNF8/VPS25	2
BP	GO:0032740	positive regulation of interleukin-17 production	2/220	27/18903	0.0391092189583411	0.0391092189583411	0.208264375592448	ARID5A/LY9	2
BP	GO:0033081	regulation of T cell differentiation in thymus	2/220	27/18903	0.0391092189583411	0.0391092189583411	0.208264375592448	PTPN2/ZC3H8	2
BP	GO:0042059	negative regulation of epidermal growth factor receptor signaling pathway	2/220	27/18903	0.0391092189583411	0.0391092189583411	0.208264375592448	PTPN2/VPS25	2
BP	GO:1903055	positive regulation of extracellular matrix organization	2/220	27/18903	0.0391092189583411	0.0391092189583411	0.208264375592448	CFLAR/RB1	2
BP	GO:0016241	regulation of macroautophagy	5/220	160/18903	0.0393986571798939	0.0393986571798939	0.208669027757794	SESN3/CAPNS1/MAP3K7/SCOC/SUPT5H	5
BP	GO:1990845	adaptive thermogenesis	5/220	160/18903	0.0393986571798939	0.0393986571798939	0.208669027757794	ATF4/EHMT1/RB1/ADIPOR1/ALPL	5
BP	GO:0045637	regulation of myeloid cell differentiation	6/220	214/18903	0.0394931458942761	0.0394931458942761	0.208669027757794	STAT3/HMGB2/PTPN2/RB1/ZFP36/NDFIP1	6
BP	GO:0050821	protein stabilization	6/220	214/18903	0.0394931458942761	0.0394931458942761	0.208669027757794	TNIP2/EP300/VHL/GRN/LAMP1/SEC16A	6
BP	GO:0032507	maintenance of protein location in cell	3/220	65/18903	0.0401069112055897	0.0401069112055897	0.211499685345881	SRGN/TMSB10/TXN	3
BP	GO:0031348	negative regulation of defense response	7/220	272/18903	0.040390517150501	0.040390517150501	0.212581669213163	PTPN2/SERPINB9/RB1/SEC14L1/ZFP36/GRN/NDFIP1	7
BP	GO:0018107	peptidyl-threonine phosphorylation	4/220	111/18903	0.0408076325958983	0.0408076325958983	0.214360779140021	BCL2/HIPK2/DDIT4/CSNK2A1	4
BP	GO:0034605	cellular response to heat	3/220	66/18903	0.041667843107526	0.041667843107526	0.217402434311389	VCP/EP300/CREBBP	3
BP	GO:1903051	negative regulation of proteolysis involved in protein catabolic process	3/220	66/18903	0.041667843107526	0.041667843107526	0.217402434311389	HIPK2/SVIP/CSNK2A1	3
BP	GO:0006515	protein quality control for misfolded or incompletely synthesized proteins	2/220	28/18903	0.0418014509256728	0.0418014509256728	0.217402434311389	VCP/YME1L1	2
BP	GO:0034063	stress granule assembly	2/220	28/18903	0.0418014509256728	0.0418014509256728	0.217402434311389	G3BP2/DDX3X	2
BP	GO:2000819	regulation of nucleotide-excision repair	2/220	28/18903	0.0418014509256728	0.0418014509256728	0.217402434311389	SMARCB1/ARID2	2
BP	GO:0036503	ERAD pathway	4/220	112/18903	0.0419481163058694	0.0419481163058694	0.217402434311389	HERPUD1/VCP/SVIP/DNAJB14	4
BP	GO:0045445	myoblast differentiation	4/220	112/18903	0.0419481163058694	0.0419481163058694	0.217402434311389	SMARCB1/REST/RB1/ARID2	4
BP	GO:0043523	regulation of neuron apoptotic process	6/220	218/18903	0.0425737146631455	0.0425737146631455	0.220223614418641	BCL2/ATF4/KRAS/HIPK2/GRN/NONO	6
BP	GO:0052547	regulation of peptidase activity	10/220	459/18903	0.0429266350831827	0.0429266350831827	0.221626236269064	CFLAR/STAT3/CD27/DDX3X/VCP/REST/MBP/SERPINB9/CSNK2A1/GRN	10
BP	GO:0007519	skeletal muscle tissue development	5/220	164/18903	0.0430476609439071	0.0430476609439071	0.221828550991717	BCL2/CFLAR/KRAS/RB1/EP300	5
BP	GO:0042776	proton motive force-driven mitochondrial ATP synthesis	3/220	67/18903	0.0432590104518214	0.0432590104518214	0.222494660767882	SDHB/NDUFA5/SDHD	3
BP	GO:0009408	response to heat	4/220	114/18903	0.044282834833865	0.044282834833865	0.227329146126799	TP53INP1/VCP/EP300/CREBBP	4
BP	GO:0043247	telomere maintenance in response to DNA damage	2/220	29/18903	0.0445611491563449	0.0445611491563449	0.227894655566212	ERCC1/TERF2	2
BP	GO:0048873	homeostasis of number of cells within a tissue	2/220	29/18903	0.0445611491563449	0.0445611491563449	0.227894655566212	BCL2/KRAS	2
BP	GO:0006949	syncytium formation	3/220	68/18903	0.0448802417278478	0.0448802417278478	0.228207352992717	CFLAR/ERCC1/DOCK2	3
BP	GO:0042093	T-helper cell differentiation	3/220	68/18903	0.0448802417278478	0.0448802417278478	0.228207352992717	GPR183/STAT3/LY9	3
BP	GO:0051250	negative regulation of lymphocyte activation	5/220	166/18903	0.0449460105377048	0.0449460105377048	0.228207352992717	TNFRSF13B/SAMSN1/PTPN2/ZC3H8/NDFIP1	5
BP	GO:0050866	negative regulation of cell activation	6/220	221/18903	0.0449807863562744	0.0449807863562744	0.228207352992717	TNFRSF13B/SAMSN1/PTPN2/ZC3H8/GRN/NDFIP1	6
BP	GO:0051251	positive regulation of lymphocyte activation	9/220	400/18903	0.0450432571489508	0.0450432571489508	0.228207352992717	MIF/TNFRSF13C/BCL2/GPR183/CD27/SMARCB1/TNIP2/ARID2/LAMP1	9
BP	GO:0035710	CD4-positive, alpha-beta T cell activation	4/220	115/18903	0.0454770545181001	0.0454770545181001	0.229547026137622	GPR183/STAT3/LY9/NDFIP1	4
BP	GO:1990748	cellular detoxification	4/220	115/18903	0.0454770545181001	0.0454770545181001	0.229547026137622	HBB/TP53INP1/TXN/HBA2	4
BP	GO:0050922	negative regulation of chemotaxis	3/220	69/18903	0.0465313568383369	0.0465313568383369	0.233531034333796	MIF/PTPN2/DUSP1	3
BP	GO:0002832	negative regulation of response to biotic stimulus	4/220	116/18903	0.0466891648873687	0.0466891648873687	0.233531034333796	PTPN2/SERPINB9/SEC14L1/GRN	4
BP	GO:0050867	positive regulation of cell activation	10/220	467/18903	0.0472595948959678	0.0472595948959678	0.233531034333796	MIF/TNFRSF13C/BCL2/GPR183/CD27/SMARCB1/TNIP2/ARID2/LAMP1/JUND	10
BP	GO:0008535	respiratory chain complex IV assembly	2/220	30/18903	0.0473863943454014	0.0473863943454014	0.233531034333796	PET100/SURF1	2
BP	GO:0039694	viral RNA genome replication	2/220	30/18903	0.0473863943454014	0.0473863943454014	0.233531034333796	SMARCB1/ATG16L2	2
BP	GO:0042744	hydrogen peroxide catabolic process	2/220	30/18903	0.0473863943454014	0.0473863943454014	0.233531034333796	HBB/HBA2	2
BP	GO:0043032	positive regulation of macrophage activation	2/220	30/18903	0.0473863943454014	0.0473863943454014	0.233531034333796	TNIP2/JUND	2
BP	GO:0060325	face morphogenesis	2/220	30/18903	0.0473863943454014	0.0473863943454014	0.233531034333796	ANKRD11/EP300	2
BP	GO:0070498	interleukin-1-mediated signaling pathway	2/220	30/18903	0.0473863943454014	0.0473863943454014	0.233531034333796	TNIP2/MAP3K7	2
BP	GO:0072539	T-helper 17 cell differentiation	2/220	30/18903	0.0473863943454014	0.0473863943454014	0.233531034333796	STAT3/LY9	2
BP	GO:1900101	regulation of endoplasmic reticulum unfolded protein response	2/220	30/18903	0.0473863943454014	0.0473863943454014	0.233531034333796	PPP1R15A/PTPN2	2
BP	GO:1902230	negative regulation of intrinsic apoptotic signaling pathway in response to DNA damage	2/220	30/18903	0.0473863943454014	0.0473863943454014	0.233531034333796	MIF/BCL2	2
BP	GO:1902914	regulation of protein polyubiquitination	2/220	30/18903	0.0473863943454014	0.0473863943454014	0.233531034333796	DDX3X/UBE2V1	2
BP	GO:0009206	purine ribonucleoside triphosphate biosynthetic process	4/220	117/18903	0.0479191491842921	0.0479191491842921	0.234614629306701	SDHB/VCP/NDUFA5/SDHD	4
BP	GO:0021782	glial cell development	4/220	117/18903	0.0479191491842921	0.0479191491842921	0.234614629306701	KRAS/GRN/AKT2/NRROS	4
BP	GO:0046632	alpha-beta T cell differentiation	4/220	117/18903	0.0479191491842921	0.0479191491842921	0.234614629306701	BCL2/GPR183/STAT3/LY9	4
BP	GO:0002294	CD4-positive, alpha-beta T cell differentiation involved in immune response	3/220	70/18903	0.0482121674165595	0.0482121674165595	0.234614629306701	GPR183/STAT3/LY9	3
BP	GO:0032722	positive regulation of chemokine production	3/220	70/18903	0.0482121674165595	0.0482121674165595	0.234614629306701	MIF/DDX3X/MBP	3
BP	GO:0043627	response to estrogen	3/220	70/18903	0.0482121674165595	0.0482121674165595	0.234614629306701	ARID5A/SERPINB9/EP300	3
BP	GO:0051881	regulation of mitochondrial membrane potential	3/220	70/18903	0.0482121674165595	0.0482121674165595	0.234614629306701	BCL2/VCP/AKT2	3
BP	GO:0033157	regulation of intracellular protein transport	6/220	225/18903	0.0483201441379484	0.0483201441379484	0.234718677900806	SIRT7/NMT1/MDFIC/SVIP/AKT2/TXN	6
BP	GO:0007088	regulation of mitotic nuclear division	4/220	118/18903	0.0491669870581858	0.0491669870581858	0.237555102119952	IK/RB1/PHIP/DUSP1	4
BP	GO:0009145	purine nucleoside triphosphate biosynthetic process	4/220	118/18903	0.0491669870581858	0.0491669870581858	0.237555102119952	SDHB/VCP/NDUFA5/SDHD	4
BP	GO:1901800	positive regulation of proteasomal protein catabolic process	4/220	118/18903	0.0491669870581858	0.0491669870581858	0.237555102119952	RNF19A/HERPUD1/VCP/PSMC2	4
BP	GO:0002287	alpha-beta T cell activation involved in immune response	3/220	71/18903	0.0499224771362735	0.0499224771362735	0.23865288893698	GPR183/STAT3/LY9	3
BP	GO:0002293	alpha-beta T cell differentiation involved in immune response	3/220	71/18903	0.0499224771362735	0.0499224771362735	0.23865288893698	GPR183/STAT3/LY9	3
BP	GO:0002562	somatic diversification of immune receptors via germline recombination within a single locus	3/220	71/18903	0.0499224771362735	0.0499224771362735	0.23865288893698	HMGB2/ERCC1/NDFIP1	3
BP	GO:0016444	somatic cell DNA recombination	3/220	71/18903	0.0499224771362735	0.0499224771362735	0.23865288893698	HMGB2/ERCC1/NDFIP1	3
BP	GO:0032922	circadian regulation of gene expression	3/220	71/18903	0.0499224771362735	0.0499224771362735	0.23865288893698	ATF4/TOP1/BHLHE41	3
BP	GO:2000036	regulation of stem cell population maintenance	3/220	71/18903	0.0499224771362735	0.0499224771362735	0.23865288893698	BRD9/SMARCB1/REST	3
CC	GO:0042788	polysomal ribosome	9/227	31/19869	4.58536110122025e-11	4.58536110122025e-11	1.42870198522231e-08	RPS29/RPL38/RPS28/RPL36A/RPS21/RPL18A/RPL8/RPL36/RPL31	9
CC	GO:0005844	polysome	11/227	66/19869	2.1014093373861e-10	2.1014093373861e-10	2.2979879233199e-08	RPS29/RPL38/RPS28/RPL36A/RPS21/RPL18A/RPL8/RPL36/UPF2/RPS4Y1/RPL31	11
CC	GO:0022626	cytosolic ribosome	13/227	105/19869	2.21258972346679e-10	2.21258972346679e-10	2.2979879233199e-08	RPS29/RPL38/RPS28/RPL17/RPL36A/RPS20/RPS21/RPL18A/RPL8/RPL36/RPS4Y1/RPL31/HBA2	13
CC	GO:0044391	ribosomal subunit	15/227	188/19869	4.52203665237307e-09	4.52203665237307e-09	3.52242855026955e-07	RPS29/RPL38/RPS28/RPL17/RPL36A/RPS20/RPS21/RPL18A/RPL8/RPL36/RPS4Y1/RPL31/MRPL11/HBA2/MRPL2	15
CC	GO:0005840	ribosome	15/227	232/19869	7.60673074452294e-08	7.60673074452294e-08	4.74019431658693e-06	RPS29/RPL38/RPS28/RPL17/RPL36A/RPS20/RPS21/RPL18A/RPL8/RPL36/RPS4Y1/RPL31/MRPL11/HBA2/MRPL2	15
CC	GO:0022625	cytosolic large ribosomal subunit	7/227	59/19869	4.76975786666307e-06	4.76975786666307e-06	0.000247692689216187	RPL38/RPL17/RPL36A/RPL18A/RPL8/RPL36/RPL31	7
CC	GO:0015934	large ribosomal subunit	9/227	115/19869	6.96943215908139e-06	6.96943215908139e-06	0.000310218333697458	RPL38/RPL17/RPL36A/RPL18A/RPL8/RPL36/RPL31/MRPL11/MRPL2	9
CC	GO:0022627	cytosolic small ribosomal subunit	6/227	45/19869	1.16838460510106e-05	1.16838460510106e-05	0.000455055056723573	RPS29/RPS28/RPS20/RPS21/RPS4Y1/HBA2	6
CC	GO:0010494	cytoplasmic stress granule	7/227	84/19869	4.97355127560734e-05	4.97355127560734e-05	0.00172183763459623	G3BP2/DDX3X/HIPK2/EIF4E/VCP/ZFP36/PQBP1	7
CC	GO:1904949	ATPase complex	7/227	94/19869	0.000102066644939155	0.000102066644939155	0.00318018177915682	BRD9/SMARCB1/VCP/RSF1/RB1/CSNK2A1/ARID2	7
CC	GO:0036464	cytoplasmic ribonucleoprotein granule	11/227	248/19869	0.000139129973896274	0.000139129973896274	0.00394090643763609	SQSTM1/UPF2/G3BP2/DDX3X/HIPK2/EIF4E/VCP/TOP1/ZFP36/PQBP1/PSMC2	11
CC	GO:0035770	ribonucleoprotein granule	11/227	265/19869	0.000247308026740174	0.000247308026740174	0.00601574615408876	SQSTM1/UPF2/G3BP2/DDX3X/HIPK2/EIF4E/VCP/TOP1/ZFP36/PQBP1/PSMC2	11
CC	GO:0015935	small ribosomal subunit	6/227	77/19869	0.000250994814199312	0.000250994814199312	0.00601574615408876	RPS29/RPS28/RPS20/RPS21/RPS4Y1/HBA2	6
CC	GO:0016514	SWI/SNF complex	4/227	30/19869	0.000360076970652201	0.000360076970652201	0.00801374310624446	BRD9/SMARCB1/RB1/ARID2	4
CC	GO:0070603	SWI/SNF superfamily-type complex	6/227	90/19869	0.000582888048646821	0.000582888048646821	0.0121077096420673	BRD9/SMARCB1/RSF1/RB1/CSNK2A1/ARID2	6
CC	GO:1904813	ficolin-1-rich granule lumen	6/227	124/19869	0.00303586109288853	0.00303586109288853	0.0591194002299346	MIF/HBB/DDX3X/VCP/PSMC2/PSMD12	6
CC	GO:0000932	P-body	5/227	97/19869	0.00512505879702251	0.00512505879702251	0.0939329661869141	SQSTM1/EIF4E/TOP1/ZFP36/PSMC2	5
CC	GO:0101002	ficolin-1-rich granule	7/227	185/19869	0.00547666308250675	0.00547666308250675	0.094800717685497	MIF/HBB/DDX3X/VCP/PSMC2/LAMP1/PSMD12	7
CC	GO:0000109	nucleotide-excision repair complex	2/227	11/19869	0.00667809823926062	0.00667809823926062	0.0963541377461947	ERCC1/XPC	2
CC	GO:0031838	haptoglobin-hemoglobin complex	2/227	11/19869	0.00667809823926062	0.00667809823926062	0.0963541377461947	HBB/HBA2	2
CC	GO:0043073	germ cell nucleus	4/227	66/19869	0.00687816955551493	0.00687816955551493	0.0963541377461947	MARCKS/SMARCB1/TOP1/TERF2	4
CC	GO:0090734	site of DNA damage	5/227	106/19869	0.00742350514860775	0.00742350514860775	0.0963541377461947	SIRT7/VCP/XPC/SMARCAD1/HELQ	5
CC	GO:0005833	hemoglobin complex	2/227	12/19869	0.00795371347483666	0.00795371347483666	0.0963541377461947	HBB/HBA2	2
CC	GO:0005845	mRNA cap binding complex	2/227	12/19869	0.00795371347483666	0.00795371347483666	0.0963541377461947	EIF4E/NCBP2	2
CC	GO:0044754	autolysosome	2/227	12/19869	0.00795371347483666	0.00795371347483666	0.0963541377461947	SQSTM1/LAMP1	2
CC	GO:0090575	RNA polymerase II transcription regulator complex	8/227	249/19869	0.00804036217003719	0.00804036217003719	0.0963541377461947	ATF4/STAT3/HIPK2/LMO4/CREBZF/RB1/NONO/JUND	8
CC	GO:0098562	cytoplasmic side of membrane	7/227	204/19869	0.00916633656370299	0.00916633656370299	0.100237372447536	RPS29/RPS28/KRAS/GNB1/SNX9/CYTH1/TRAF3	7
CC	GO:0034518	RNA cap binding complex	2/227	13/19869	0.00932952571260007	0.00932952571260007	0.100237372447536	EIF4E/NCBP2	2
CC	GO:0044194	cytolytic granule	2/227	13/19869	0.00932952571260007	0.00932952571260007	0.100237372447536	SRGN/LAMP1	2
CC	GO:0005741	mitochondrial outer membrane	7/227	207/19869	0.00988353853321069	0.00988353853321069	0.1026500844151	BCL2/KRAS/TOMM5/PPP1R15A/UBC/HADHB/LETMD1	7
CC	GO:0016586	RSC-type complex	2/227	14/19869	0.0108030996554634	0.0108030996554634	0.10518807559267	SMARCB1/ARID2	2
CC	GO:0098554	cytoplasmic side of endoplasmic reticulum membrane	2/227	14/19869	0.0108030996554634	0.0108030996554634	0.10518807559267	RPS29/RPS28	2
CC	GO:0034774	secretory granule lumen	9/227	322/19869	0.0120240406069856	0.0120240406069856	0.113528421679992	MIF/SRGN/DDX3X/VCP/SPTAN1/DOCK2/GRN/PSMC2/PSMD12	9
CC	GO:0060205	cytoplasmic vesicle lumen	9/227	325/19869	0.0127109239916223	0.0127109239916223	0.116484009334991	MIF/SRGN/DDX3X/VCP/SPTAN1/DOCK2/GRN/PSMC2/PSMD12	9
CC	GO:0031983	vesicle lumen	9/227	327/19869	0.0131848213572834	0.0131848213572834	0.117374650278373	MIF/SRGN/DDX3X/VCP/SPTAN1/DOCK2/GRN/PSMC2/PSMD12	9
CC	GO:1905369	endopeptidase complex	4/227	82/19869	0.0145017340141982	0.0145017340141982	0.125512083865575	VCP/CAPNS1/PSMC2/PSMD12	4
CC	GO:0008023	transcription elongation factor complex	3/227	46/19869	0.015572235109252	0.015572235109252	0.131134611446332	ZC3H8/AFF4/SUPT5H	3
CC	GO:0005767	secondary lysosome	2/227	18/19869	0.0176277680927484	0.0176277680927484	0.144537932284031	SQSTM1/LAMP1	2
CC	GO:0031968	organelle outer membrane	7/227	235/19869	0.0186742971370126	0.0186742971370126	0.148608520173068	BCL2/KRAS/TOMM5/PPP1R15A/UBC/HADHB/LETMD1	7
CC	GO:0019867	outer membrane	7/227	237/19869	0.0194613158917977	0.0194613158917977	0.148608520173068	BCL2/KRAS/TOMM5/PPP1R15A/UBC/HADHB/LETMD1	7
CC	GO:0005838	proteasome regulatory particle	2/227	19/19869	0.0195550738538547	0.0195550738538547	0.148608520173068	PSMC2/PSMD12	2
CC	GO:0000123	histone acetyltransferase complex	4/227	91/19869	0.0204820513566194	0.0204820513566194	0.151947047658129	PHF20/EP300/CREBBP/MAP3K7	4
CC	GO:0016607	nuclear speck	10/227	419/19869	0.0226938687375153	0.0226938687375153	0.161215003735894	ATF4/IK/SIRT7/BRD2/FNBP4/ZNF395/PQBP1/SON/NONO/NSRP1	10
CC	GO:0005746	mitochondrial respirasome	4/227	94/19869	0.0227661728248661	0.0227661728248661	0.161215003735894	SDHB/NDUFA5/SDHD/SURF1	4
CC	GO:0001650	fibrillar center	5/227	145/19869	0.0256289579083044	0.0256289579083044	0.165478345507041	SMARCB1/TOP1/AFF4/NONO/KLF6	5
CC	GO:0031234	extrinsic component of cytoplasmic side of plasma membrane	4/227	99/19869	0.0269055524272512	0.0269055524272512	0.165478345507041	KRAS/GNB1/SNX9/CYTH1	4
CC	GO:0022624	proteasome accessory complex	2/227	23/19869	0.0280830799231192	0.0280830799231192	0.165478345507041	PSMC2/PSMD12	2
CC	GO:0035371	microtubule plus-end	2/227	23/19869	0.0280830799231192	0.0280830799231192	0.165478345507041	CLIP1/SLAIN2	2
CC	GO:0071682	endocytic vesicle lumen	2/227	23/19869	0.0280830799231192	0.0280830799231192	0.165478345507041	HBB/HBA2	2
CC	GO:0005743	mitochondrial inner membrane	11/227	498/19869	0.0285086889111783	0.0285086889111783	0.165478345507041	PET100/SDHB/NDUFA5/SDHD/MRPL11/YME1L1/CDS2/HADHB/SURF1/LETMD1/MRPL2	11
CC	GO:0035577	azurophil granule membrane	3/227	58/19869	0.028665496298675	0.028665496298675	0.165478345507041	PSAP/SYNGR1/LAMP1	3
CC	GO:0031248	protein acetyltransferase complex	4/227	101/19869	0.0286791862314567	0.0286791862314567	0.165478345507041	PHF20/EP300/CREBBP/MAP3K7	4
CC	GO:0070469	respirasome	4/227	101/19869	0.0286791862314567	0.0286791862314567	0.165478345507041	SDHB/NDUFA5/SDHD/SURF1	4
CC	GO:1902493	acetyltransferase complex	4/227	101/19869	0.0286791862314567	0.0286791862314567	0.165478345507041	PHF20/EP300/CREBBP/MAP3K7	4
CC	GO:0000502	proteasome complex	3/227	59/19869	0.0299536212483567	0.0299536212483567	0.169194554227516	VCP/PSMC2/PSMD12	3
CC	GO:0030867	rough endoplasmic reticulum membrane	2/227	24/19869	0.0304092915030536	0.0304092915030536	0.169194554227516	RPS29/RPS28	2
CC	GO:0016605	PML body	4/227	105/19869	0.0324307493157332	0.0324307493157332	0.173455554327713	SQSTM1/HIPK2/TP53INP1/RB1	4
CC	GO:0005766	primary lysosome	5/227	155/19869	0.032845215608339	0.032845215608339	0.173455554327713	PSAP/VCP/SYNGR1/GRN/LAMP1	5
CC	GO:0042582	azurophil granule	5/227	155/19869	0.032845215608339	0.032845215608339	0.173455554327713	PSAP/VCP/SYNGR1/GRN/LAMP1	5
CC	GO:0000776	kinetochore	5/227	164/19869	0.0403243374520617	0.0403243374520617	0.206514530667167	SMARCB1/CLIP1/ARID2/PMF1/FBXW11	5
CC	GO:0036452	ESCRT complex	2/227	28/19869	0.0404308008518998	0.0404308008518998	0.206514530667167	SNF8/VPS25	2
CC	GO:0005776	autophagosome	4/227	115/19869	0.0430124924056217	0.0430124924056217	0.216157856571545	SQSTM1/TP53INP1/LAMP1/ATG16L2	4
CC	GO:1905368	peptidase complex	4/227	118/19869	0.0465234129885039	0.0465234129885039	0.230090730903879	VCP/CAPNS1/PSMC2/PSMD12	4
CC	GO:0009898	cytoplasmic side of plasma membrane	5/227	173/19869	0.0487591536764291	0.0487591536764291	0.237380090266826	KRAS/GNB1/SNX9/CYTH1/TRAF3	5
CC	GO:0000779	condensed chromosome, centromeric region	5/227	174/19869	0.0497559343332866	0.0497559343332866	0.238506179152273	SMARCB1/CLIP1/ARID2/PMF1/FBXW11	5
MF	GO:0003735	structural constituent of ribosome	14/224	176/18432	3.31967673526395e-08	3.31967673526395e-08	1.3593202631765e-05	RPS29/RPL38/RPS28/RPL17/RPL36A/RPS20/RPS21/RPL18A/RPL8/RPL36/RPS4Y1/RPL31/MRPL11/MRPL2	14
MF	GO:0140297	DNA-binding transcription factor binding	22/224	476/18432	8.99545092569736e-08	8.99545092569736e-08	1.84170021584014e-05	BCL2/ATF4/STAT3/SMARCB1/YWHAH/ARID5A/HIPK2/LMO4/EIF4E/HMGB2/PTPN2/XPC/REST/MDFIC/RB1/EP300/CREBBP/BHLHE41/C1D/VHL/SIK1/JUND	22
MF	GO:0061629	RNA polymerase II-specific DNA-binding transcription factor binding	16/224	350/18432	6.31583966234314e-06	6.31583966234314e-06	0.000862056711807538	ATF4/STAT3/SMARCB1/YWHAH/ARID5A/HIPK2/PTPN2/XPC/REST/MDFIC/RB1/EP300/CREBBP/BHLHE41/C1D/JUND	16
MF	GO:0002020	protease binding	8/224	139/18432	0.000302227981942139	0.000302227981942139	0.03093860130934	MIF/BCL2/CFLAR/PSAP/VCP/MBP/SERPINB9/UBC	8
MF	GO:0140658	ATP-dependent chromatin remodeler activity	4/224	33/18432	0.000658933059135342	0.000658933059135342	0.0471568078865976	CHD6/CHD2/RSF1/SMARCAD1	4
MF	GO:0140097	catalytic activity, acting on DNA	10/224	241/18432	0.000756628345181514	0.000756628345181514	0.0471568078865976	REV3L/CHD6/DDX3X/CHD2/ERCC1/RSF1/TOP1/SMARCAD1/HELQ/TERF2	10
MF	GO:0003697	single-stranded DNA binding	7/224	124/18432	0.000806151085979111	0.000806151085979111	0.0471568078865976	HMGB2/ERCC1/XPC/WBP11/TOP1/TERF2/TSNAX	7
MF	GO:0003684	damaged DNA binding	5/224	71/18432	0.0017209432919247	0.0017209432919247	0.0825492178300588	HMGB2/ERCC1/XPC/EP300/CREBBP	5
MF	GO:0003678	DNA helicase activity	5/224	72/18432	0.00183137119002131	0.00183137119002131	0.0825492178300588	CHD6/DDX3X/CHD2/SMARCAD1/HELQ	5
MF	GO:0001221	transcription coregulator binding	6/224	109/18432	0.00215687780725804	0.00215687780725804	0.0825492178300588	EHMT1/ZNF644/CHD6/EP300/CREBBP/JUND	6
MF	GO:0003714	transcription corepressor activity	8/224	191/18432	0.00237897589454126	0.00237897589454126	0.0825492178300588	SIRT7/PARP15/ARID5A/HIPK2/RB1/CREBBP/C1D/SFMBT1	8
MF	GO:0070577	lysine-acetylated histone binding	3/224	23/18432	0.00262077850951472	0.00262077850951472	0.0825492178300588	BRD9/BRD2/PHIP	3
MF	GO:0140033	acetylation-dependent protein binding	3/224	23/18432	0.00262077850951472	0.00262077850951472	0.0825492178300588	BRD9/BRD2/PHIP	3
MF	GO:0008094	ATP-dependent activity, acting on DNA	6/224	121/18432	0.00363158740519054	0.00363158740519054	0.106217105309708	CHD6/DDX3X/CHD2/RSF1/SMARCAD1/HELQ	6
MF	GO:0016407	acetyltransferase activity	5/224	88/18432	0.00438663916325645	0.00438663916325645	0.11226333121755	SAT1/ACAT1/EP300/CREBBP/HADHB	5
MF	GO:0016410	N-acyltransferase activity	5/224	88/18432	0.00438663916325645	0.00438663916325645	0.11226333121755	SAT1/SIRT7/NMT1/EP300/CREBBP	5
MF	GO:0071889	14-3-3 protein binding	3/224	31/18432	0.00619411655614798	0.00619411655614798	0.120985596783978	DDIT4/ZFP36/SIK1	3
MF	GO:0008330	protein tyrosine/threonine phosphatase activity	2/224	10/18432	0.00620478831835566	0.00620478831835566	0.120985596783978	DUSP2/DUSP1	2
MF	GO:0030957	Tat protein binding	2/224	10/18432	0.00620478831835566	0.00620478831835566	0.120985596783978	SMARCB1/MDFIC	2
MF	GO:0031720	haptoglobin binding	2/224	10/18432	0.00620478831835566	0.00620478831835566	0.120985596783978	HBB/HBA2	2
MF	GO:0070878	primary miRNA binding	2/224	10/18432	0.00620478831835566	0.00620478831835566	0.120985596783978	STAT3/DDX3X	2
MF	GO:0031369	translation initiation factor binding	3/224	32/18432	0.00677441262593932	0.00677441262593932	0.122117878144615	DDX3X/EIF4E/EIF5	3
MF	GO:0019107	myristoyltransferase activity	2/224	11/18432	0.00752320703464211	0.00752320703464211	0.122117878144615	NMT1/HADHB	2
MF	GO:0043522	leucine zipper domain binding	2/224	11/18432	0.00752320703464211	0.00752320703464211	0.122117878144615	ATF4/PMF1	2
MF	GO:0003713	transcription coactivator activity	9/224	281/18432	0.00759586614266777	0.00759586614266777	0.122117878144615	SMARCB1/HIPK2/LMO4/HMGB2/XPC/EP300/CREBBP/PQBP1/PMF1	9
MF	GO:0045296	cadherin binding	10/224	333/18432	0.0077540143706221	0.0077540143706221	0.122117878144615	KTN1/RSL1D1/DDX3X/SNX9/SPTAN1/ZC3H15/EIF5/ARHGAP1/PKN2/EEF1G	10
MF	GO:0000340	RNA 7-methylguanosine cap binding	2/224	12/18432	0.00895598986073552	0.00895598986073552	0.126468776313243	EIF4E/NCBP2	2
MF	GO:0097677	STAT family protein binding	2/224	12/18432	0.00895598986073552	0.00895598986073552	0.126468776313243	PTPN2/EP300	2
MF	GO:0002039	p53 binding	4/224	67/18432	0.00895685035329007	0.00895685035329007	0.126468776313243	EHMT1/SMARCB1/EP300/CREBBP	4
MF	GO:0016887	ATP hydrolysis activity	10/224	347/18432	0.0101800038039568	0.0101800038039568	0.138695179846412	CHD6/DDX3X/CHD2/VCP/SMARCAD1/YME1L1/PSMC2/HELQ/ALPL/DDX50	10
MF	GO:0017017	MAP kinase tyrosine/serine/threonine phosphatase activity	2/224	13/18432	0.0105001877801461	0.0105001877801461	0.138695179846412	DUSP2/DUSP1	2
MF	GO:0004386	helicase activity	6/224	155/18432	0.0117748738577012	0.0117748738577012	0.150671905613348	CHD6/DDX3X/CHD2/SMARCAD1/HELQ/DDX50	6
MF	GO:0005344	oxygen carrier activity	2/224	14/18432	0.0121529060059532	0.0121529060059532	0.150796824124906	HBB/HBA2	2
MF	GO:0042393	histone binding	8/224	258/18432	0.0138279550753006	0.0138279550753006	0.158230903771498	BRD9/CHD6/BRD2/CHD2/RSF1/PHIP/TSPYL2/SFMBT1	8
MF	GO:0016863	intramolecular oxidoreductase activity, transposing C=C bonds	2/224	15/18432	0.0139113031079312	0.0139113031079312	0.158230903771498	MIF/EBP	2
MF	GO:0070742	C2H2 zinc finger domain binding	2/224	15/18432	0.0139113031079312	0.0139113031079312	0.158230903771498	EHMT1/EBF1	2
MF	GO:0005092	GDP-dissociation inhibitor activity	2/224	16/18432	0.015772590152732	0.015772590152732	0.165601553830304	ARHGDIA/EIF5	2
MF	GO:0030275	LRR domain binding	2/224	16/18432	0.015772590152732	0.015772590152732	0.165601553830304	ATF4/PMF1	2
MF	GO:0070403	NAD+ binding	2/224	16/18432	0.015772590152732	0.015772590152732	0.165601553830304	SIRT7/PARP15	2
MF	GO:0009055	electron transfer activity	5/224	122/18432	0.0167004942093113	0.0167004942093113	0.170960322300581	SDHB/NDUFA5/SDHD/SURF1/AKR1B1	5
MF	GO:0048038	quinone binding	2/224	17/18432	0.0177340298569374	0.0177340298569374	0.177112647351698	SDHB/SDHD	2
MF	GO:0016747	acyltransferase activity, transferring groups other than amino-acyl groups	7/224	221/18432	0.0186549094624872	0.0186549094624872	0.178784302130483	SAT1/SIRT7/NMT1/ACAT1/EP300/CREBBP/HADHB	7
MF	GO:0140030	modification-dependent protein binding	6/224	172/18432	0.0187746497224428	0.0187746497224428	0.178784302130483	SQSTM1/BRD9/BRD2/VCP/TNIP2/PHIP	6
MF	GO:0033549	MAP kinase phosphatase activity	2/224	18/18432	0.0197929357527979	0.0197929357527979	0.182024759920115	DUSP2/DUSP1	2
MF	GO:0016209	antioxidant activity	4/224	85/18432	0.0200040063922491	0.0200040063922491	0.182024759920115	HBB/TP53INP1/TXN/HBA2	4
MF	GO:0000339	RNA cap binding	2/224	19/18432	0.0219466713664771	0.0219466713664771	0.191203922991256	EIF4E/NCBP2	2
MF	GO:0008301	DNA binding, bending	2/224	19/18432	0.0219466713664771	0.0219466713664771	0.191203922991256	HMGB2/TOP1	2
MF	GO:0016860	intramolecular oxidoreductase activity	3/224	51/18432	0.0240489152072061	0.0240489152072061	0.202168434370655	MIF/EBP/PDIA3	3
MF	GO:0016408	C-acyltransferase activity	2/224	20/18432	0.0241926494086221	0.0241926494086221	0.202168434370655	ACAT1/HADHB	2
MF	GO:0035613	RNA stem-loop binding	2/224	21/18432	0.0265283309770854	0.0265283309770854	0.20932006042593	DDX3X/ARID5A	2
MF	GO:0051010	microtubule plus-end binding	2/224	21/18432	0.0265283309770854	0.0265283309770854	0.20932006042593	CLIP1/FBXW11	2
MF	GO:0140296	general transcription initiation factor binding	3/224	53/18432	0.026582033380568	0.026582033380568	0.20932006042593	ATF4/ERCC1/BDP1	3
MF	GO:0016922	nuclear receptor binding	5/224	139/18432	0.0275155142566561	0.0275155142566561	0.211561928519826	YWHAH/ARID5A/EP300/C1D/JUND	5
MF	GO:0031593	polyubiquitin modification-dependent protein binding	3/224	54/18432	0.0279000692366762	0.0279000692366762	0.211561928519826	SQSTM1/VCP/TNIP2	3
MF	GO:0043027	cysteine-type endopeptidase inhibitor activity involved in apoptotic process	2/224	22/18432	0.0289512247716223	0.0289512247716223	0.211692226243629	CD27/SERPINB9	2
MF	GO:1990404	NAD+-protein ADP-ribosyltransferase activity	2/224	22/18432	0.0289512247716223	0.0289512247716223	0.211692226243629	PARP15/PARP8	2
MF	GO:0003950	NAD+ ADP-ribosyltransferase activity	2/224	23/18432	0.0314588863203944	0.0314588863203944	0.220223034974756	PARP15/PARP8	2
MF	GO:0016684	oxidoreductase activity, acting on peroxide as acceptor	3/224	57/18432	0.0320592437443938	0.0320592437443938	0.220223034974756	HBB/SESN3/HBA2	3
MF	GO:0036002	pre-mRNA binding	3/224	57/18432	0.0320592437443938	0.0320592437443938	0.220223034974756	TRA2B/EP300/RNU11	3
MF	GO:0016746	acyltransferase activity	7/224	248/18432	0.0322691850734218	0.0322691850734218	0.220223034974756	SAT1/SIRT7/NMT1/ACAT1/EP300/CREBBP/HADHB	7
MF	GO:0070530	K63-linked polyubiquitin modification-dependent protein binding	2/224	24/18432	0.0340489172181099	0.0340489172181099	0.228559599617683	SQSTM1/TNIP2	2
MF	GO:0070063	RNA polymerase binding	3/224	59/18432	0.0350019273807532	0.0350019273807532	0.231167228372037	ZFP36/PCF11/PKN2	3
MF	GO:0019903	protein phosphatase binding	5/224	149/18432	0.0355693087433807	0.0355693087433807	0.231185649142441	BCL2/STAT3/PPP1R15A/VCP/TRAF3	5
MF	GO:0048027	mRNA 5'-UTR binding	2/224	26/18432	0.0394667192808961	0.0394667192808961	0.24989376325103	RSL1D1/DDX3X	2
MF	GO:0008080	N-acetyltransferase activity	3/224	62/18432	0.0396682259145273	0.0396682259145273	0.24989376325103	SAT1/EP300/CREBBP	3
MF	GO:0047485	protein N-terminus binding	4/224	106/18432	0.0404174647877127	0.0404174647877127	0.250755882016272	RPS21/SNF8/CSNK2A1/VPS25	4
MF	GO:0050681	nuclear androgen receptor binding	2/224	27/18432	0.0422899172709651	0.0422899172709651	0.258456839252246	ARID5A/EP300	2
MF	GO:0051019	mitogen-activated protein kinase binding	2/224	28/18432	0.0451863368150741	0.0451863368150741	0.272097291347737	DUSP2/DUSP1	2
MF	GO:0019843	rRNA binding	3/224	67/18432	0.0481069083362599	0.0481069083362599	0.285485695542412	RPL8/RPS4Y1/MRPL11	3

## Sheet: KEGG
Table S1 The list of Kyoto Encyclopedia of Genes and Genomes (KEGG) pathways enriched by DEGs between the high and low expression groups
ID	Description	GeneRatio	BgRatio	pvalue	p.adjust	qvalue	geneID	Count
hsa05171	Coronavirus disease - COVID-19	15/136	238/9434	1.5725298735223e-06	1.5725298735223e-06	0.000291331850252552	RPS29/RPL38/RPS28/RPL17/RPL36A/RPS20/RPS21/RPL18A/RPL8/STAT3/RPL36/RPS4Y1/RPL31/TRAF3/MAP3K7	15
hsa05161	Hepatitis B	11/136	163/9434	2.21202499316397e-05	2.21202499316397e-05	0.00191299794273869	BCL2/ATF4/STAT3/KRAS/DDX3X/RB1/EP300/CREBBP/TRAF3/MAP3K7/AKT2	11
hsa04140	Autophagy - animal	11/136	169/9434	3.09775235045754e-05	3.09775235045754e-05	0.00191299794273869	BCL2/CFLAR/SQSTM1/KRAS/DDIT4/RAB8A/UBC/MAP3K7/AKT2/LAMP1/ATG16L2	11
hsa05203	Viral carcinogenesis	11/136	205/9434	0.00017712444396256	0.00017712444396256	0.00820365845721331	ATF4/STAT3/KRAS/YWHAH/DDX3X/REL/RB1/EP300/CREBBP/TRAF3/CCND2	11
hsa03250	Viral life cycle - HIV-1	6/136	64/9434	0.000303441756317076	0.000303441756317076	0.00945248108478246	SMARCB1/MDFIC/EP300/CREBBP/AFF4/SUPT5H	6
hsa04211	Longevity regulating pathway	7/136	90/9434	0.000306131489677614	0.000306131489677614	0.00945248108478246	ATF4/EHMT1/KRAS/EIF4E/SESN3/AKT2/ADIPOR1	7
hsa05167	Kaposi sarcoma-associated herpesvirus infection	10/136	196/9434	0.00052330971403325	0.00052330971403325	0.0138500014541131	STAT3/KRAS/GNB1/RB1/EP300/UBC/CREBBP/ZFP36/TRAF3/AKT2	10
hsa05169	Epstein-Barr virus infection	10/136	204/9434	0.000714964822198987	0.000714964822198987	0.0165570800930292	BCL2/STAT3/RB1/TRAF3/MAP3K7/PSMC2/AKT2/PDIA3/CCND2/PSMD12	10
hsa05215	Prostate cancer	7/136	106/9434	0.000825253013276921	0.000825253013276921	0.01698766436687	BCL2/ATF4/KRAS/RB1/EP300/CREBBP/AKT2	7
hsa04066	HIF-1 signaling pathway	7/136	110/9434	0.00102752458416915	0.00102752458416915	0.0177028993167318	BCL2/STAT3/EIF4E/EP300/CREBBP/VHL/AKT2	7
hsa05131	Shigellosis	11/136	253/9434	0.00105110964693095	0.00105110964693095	0.0177028993167318	BCL2/SQSTM1/FNBP1/UBE2V1/UBC/CYTH1/ELMO1/CAPNS1/MAP3K7/AKT2/FBXW11	11
hsa05211	Renal cell carcinoma	5/136	70/9434	0.00330624821316276	0.00330624821316276	0.049758628789577	KRAS/EP300/CREBBP/VHL/AKT2	5
hsa05162	Measles	7/136	139/9434	0.00390549862110429	0.00390549862110429	0.049758628789577	BCL2/STAT3/CSNK2A1/TRAF3/MAP3K7/AKT2/CCND2	7
hsa04064	NF-kappa B signaling pathway	6/136	105/9434	0.00402875261506518	0.00402875261506518	0.049758628789577	TNFRSF13C/BCL2/CFLAR/CSNK2A1/TRAF3/MAP3K7	6
hsa04137	Mitophagy - animal	6/136	105/9434	0.00402875261506518	0.00402875261506518	0.049758628789577	SQSTM1/ATF4/KRAS/VCP/CSNK2A1/UBC	6
hsa04922	Glucagon signaling pathway	6/136	107/9434	0.00441987656059584	0.00441987656059584	0.0511775180700571	ATF4/PHKB/EP300/CREBBP/AKT2/SIK1	6
hsa05166	Human T-cell leukemia virus 1 infection	9/136	224/9434	0.00504003523023776	0.00504003523023776	0.054925461332622	TNFRSF13C/ATF4/KRAS/RB1/EP300/CREBBP/ZFP36/AKT2/CCND2	9
hsa01521	EGFR tyrosine kinase inhibitor resistance	5/136	80/9434	0.00585844872629034	0.00585844872629034	0.060297483966497	BCL2/STAT3/KRAS/EIF4E/AKT2	5
hsa04218	Cellular senescence	7/136	157/9434	0.00753819758912014	0.00753819758912014	0.0716188801347482	SQSTM1/KRAS/HIPK2/RB1/AKT2/CCND2/FBXW11	7
hsa05160	Hepatitis C	7/136	159/9434	0.00805858384691213	0.00805858384691213	0.0716188801347482	CFLAR/STAT3/KRAS/YWHAH/RB1/TRAF3/AKT2	7
hsa04935	Growth hormone synthesis, secretion and action	6/136	122/9434	0.00830217180201292	0.00830217180201292	0.0716188801347482	ATF4/STAT3/KRAS/EP300/CREBBP/AKT2	6
hsa04340	Hedgehog signaling pathway	4/136	56/9434	0.00850474201600135	0.00850474201600135	0.0716188801347482	BCL2/PTCH2/CCND2/FBXW11	4
hsa00020	Citrate cycle (TCA cycle)	3/136	30/9434	0.00895200982262588	0.00895200982262588	0.0721077221410597	SDHB/SDHD/MDH2	3
hsa04630	JAK-STAT signaling pathway	7/136	168/9434	0.0107339257278304	0.0107339257278304	0.0828583740393929	BCL2/STAT3/PTPN2/EP300/CREBBP/AKT2/CCND2	7
hsa04141	Protein processing in endoplasmic reticulum	7/136	171/9434	0.0117547832461925	0.0117547832461925	0.0842852123428838	BCL2/ATF4/HERPUD1/PPP1R15A/VCP/SVIP/PDIA3	7
hsa05170	Human immunodeficiency virus 1 infection	8/136	213/9434	0.0118286633231206	0.0118286633231206	0.0842852123428838	BCL2/KRAS/GNB1/WEE1/MAP3K7/AKT2/PDIA3/FBXW11	8
hsa04068	FoxO signaling pathway	6/136	133/9434	0.0123958577412808	0.0123958577412808	0.0846218503616021	STAT3/KRAS/EP300/CREBBP/AKT2/CCND2	6
hsa05417	Lipid and atherosclerosis	8/136	216/9434	0.012789438747833	0.012789438747833	0.0846218503616021	BCL2/ATF4/STAT3/KRAS/ARHGEF1/TRAF3/MAP3K7/AKT2	8
hsa04210	Apoptosis	6/136	137/9434	0.0141856425388333	0.0141856425388333	0.0906233425348337	BCL2/CFLAR/ATF4/KRAS/SPTAN1/AKT2	6
hsa04720	Long-term potentiation	4/136	67/9434	0.0157274184357673	0.0157274184357673	0.0935710333754879	ATF4/KRAS/EP300/CREBBP	4
hsa05012	Parkinson disease	9/136	271/9434	0.0163800892957548	0.0163800892957548	0.0935710333754879	ATF4/SDHB/NDUFA5/SDHD/UBC/PSMC2/DUSP1/TXN/PSMD12	9
hsa05163	Human cytomegalovirus infection	8/136	226/9434	0.0164082013895233	0.0164082013895233	0.0935710333754879	ATF4/STAT3/KRAS/GNB1/ARHGEF1/RB1/AKT2/PDIA3	8
hsa05418	Fluid shear stress and atherosclerosis	6/136	142/9434	0.0166673403200088	0.0166673403200088	0.0935710333754879	BCL2/SQSTM1/MAP3K7/AKT2/DUSP1/TXN	6
hsa04550	Signaling pathways regulating pluripotency of stem cells	6/136	144/9434	0.0177390777011997	0.0177390777011997	0.0966587515607169	STAT3/KRAS/REST/SKIL/SMARCAD1/AKT2	6
hsa04917	Prolactin signaling pathway	4/136	71/9434	0.0190826881580178	0.0190826881580178	0.101009116264997	STAT3/KRAS/AKT2/CCND2	4
hsa04622	RIG-I-like receptor signaling pathway	4/136	72/9434	0.0199854501097707	0.0199854501097707	0.102849099980107	DDX3X/TRAF3/MAP3K7/OTUD5	4
hsa05223	Non-small cell lung cancer	4/136	73/9434	0.0209141806279259	0.0209141806279259	0.104719652646229	STAT3/KRAS/RB1/AKT2	4
hsa05022	Pathways of neurodegeneration - multiple diseases	13/136	483/9434	0.0218827972375594	0.0218827972375594	0.10668621367896	BCL2/SQSTM1/ATF4/KRAS/SDHB/VCP/NDUFA5/SDHD/RAB8A/CSNK2A1/UBC/PSMC2/PSMD12	13
hsa01524	Platinum drug resistance	4/136	75/9434	0.0228502441272721	0.0228502441272721	0.108546368863695	BCL2/REV3L/ERCC1/AKT2	4
hsa05212	Pancreatic cancer	4/136	77/9434	0.0248921670341104	0.0248921670341104	0.114562969903458	STAT3/KRAS/RB1/AKT2	4
hsa04932	Non-alcoholic fatty liver disease	6/136	157/9434	0.0258765858307024	0.0258765858307024	0.114562969903458	ATF4/SDHB/NDUFA5/SDHD/AKT2/ADIPOR1	6
hsa04725	Cholinergic synapse	5/136	116/9434	0.0259936280355304	0.0259936280355304	0.114562969903458	BCL2/ATF4/KRAS/GNB1/AKT2	5
hsa04110	Cell cycle	6/136	158/9434	0.0265903256849787	0.0265903256849787	0.114562969903458	YWHAH/RB1/EP300/CREBBP/WEE1/CCND2	6
hsa05132	Salmonella infection	8/136	251/9434	0.0286086252561145	0.0286086252561145	0.117814012462133	BCL2/SNX9/DYNLL2/CYTH1/ELMO1/MAP3K7/AKT2/TXN	8
hsa04668	TNF signaling pathway	5/136	119/9434	0.0286167558679328	0.0286167558679328	0.117814012462133	CFLAR/ATF4/TRAF3/MAP3K7/AKT2	5
hsa04722	Neurotrophin signaling pathway	5/136	120/9434	0.0295271011170235	0.0295271011170235	0.118919217313413	BCL2/ATF4/KRAS/ARHGDIA/AKT2	5
hsa03083	Polycomb repressive complex	4/136	83/9434	0.0316634829020852	0.0316634829020852	0.124810145369921	FBRS/EP300/CREBBP/SFMBT1	4
hsa05016	Huntington disease	9/136	311/9434	0.0357009110973896	0.0357009110973896	0.136906315096692	POLR2I/SDHB/REST/NDUFA5/SDHD/EP300/CREBBP/PSMC2/PSMD12	9
hsa04151	PI3K-Akt signaling pathway	10/136	362/9434	0.0362101645894944	0.0362101645894944	0.136906315096692	BCL2/ATF4/KRAS/YWHAH/GNB1/DDIT4/EIF4E/AKT2/PKN2/CCND2	10
hsa04310	Wnt signaling pathway	6/136	174/9434	0.0398293515184844	0.0398293515184844	0.14571743418161	EP300/CSNK2A1/CREBBP/MAP3K7/CCND2/FBXW11	6
hsa05235	PD-L1 expression and PD-1 checkpoint pathway in cancer	4/136	90/9434	0.0408069825907752	0.0408069825907752	0.14571743418161	STAT3/KRAS/CSNK2A1/AKT2	4
hsa05206	MicroRNAs in cancer	9/136	319/9434	0.0409184270404192	0.0409184270404192	0.14571743418161	BCL2/STAT3/MARCKS/KRAS/DDIT4/EP300/CREBBP/CCND2/PDCD4	9
hsa05014	Amyotrophic lateral sclerosis	10/136	371/9434	0.0416867773354775	0.0416867773354775	0.14571743418161	BCL2/SQSTM1/ATF4/SDHB/VCP/NDUFA5/SDHD/RAB8A/PSMC2/PSMD12	10
hsa04520	Adherens junction	4/136	93/9434	0.0451390677450197	0.0451390677450197	0.152047386088487	EP300/CSNK2A1/CREBBP/MAP3K7	4
hsa05222	Small cell lung cancer	4/136	93/9434	0.0451390677450197	0.0451390677450197	0.152047386088487	BCL2/RB1/TRAF3/AKT2	4
hsa04657	IL-17 signaling pathway	4/136	95/9434	0.0481649657901045	0.0481649657901045	0.159342743967263	FOSB/TRAF3/MAP3K7/JUND	4
hsa05135	Yersinia infection	5/136	138/9434	0.0490876212882236	0.0490876212882236	0.159546100585916	ARHGEF1/ELMO1/MAP3K7/AKT2/PKN2	5
